# Supplementary material for: Synthesis and In Vitro Cytotoxicity of the 4-(Halogenoanilino)-6-bromoquinazolines and Their 6-(4-Fluorophenyl) Substituted Derivatives as Potential Inhibitors of Epidermal Growth Factor Receptor Tyrosine Kinase
Source: PubMed Central journal article supplement (PMC5748644; doi:10.3390/ph10040087), 2017-11-20
Supplement: pharmaceuticals-10-00087-s001.pdf [file pharmaceuticals-10-00087-s001.pdf]

# Supplementary Materials: Synthesis and In Vitro Cytotoxicity of the 4-(Halogenoanilino)-6-bromoquinazolines and Their 6-(4-Fluorophenyl) Substituted Derivatives as Potential Inhibitors of Epidermal Growth Factor Receptor Tyrosine Kinase

Malose J. Mphahlele, Hugues K.Paumo and Yee Siew Choong

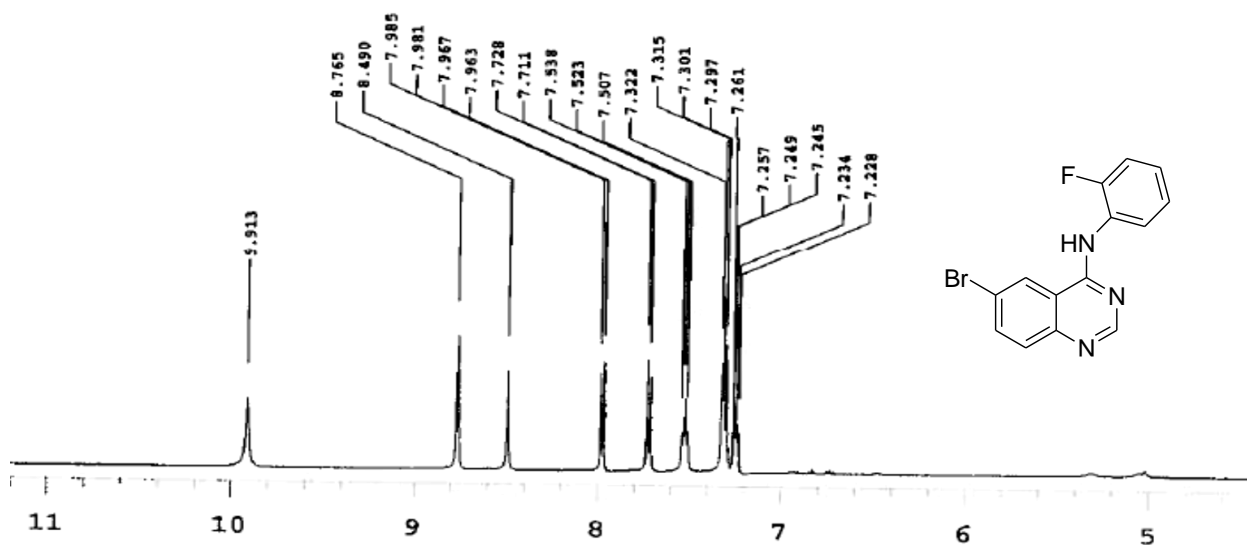

Figure 1. <sup>1</sup>H NMR spectrum of 3a in DMSO-*d*<sub>6</sub> at 500 MHz.

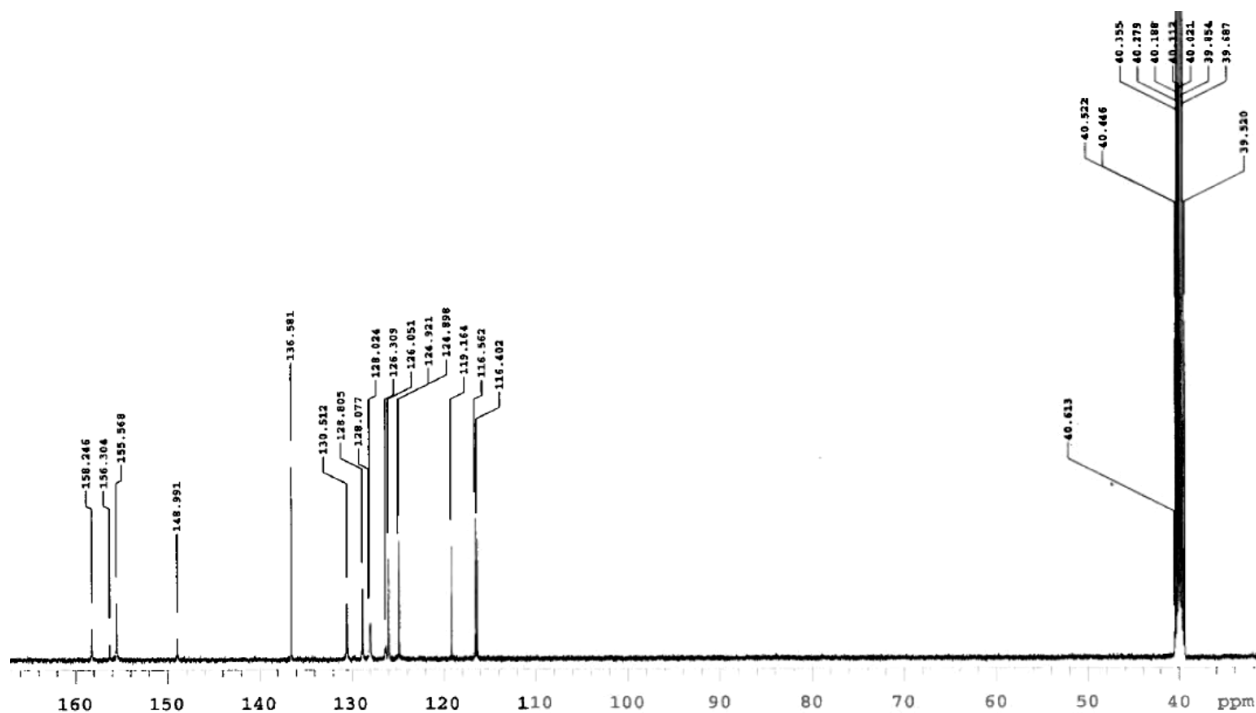

Figure 2. <sup>13</sup>C NMR spectrum of 3a in DMSO-*d*<sub>6</sub> at 125 MHz.

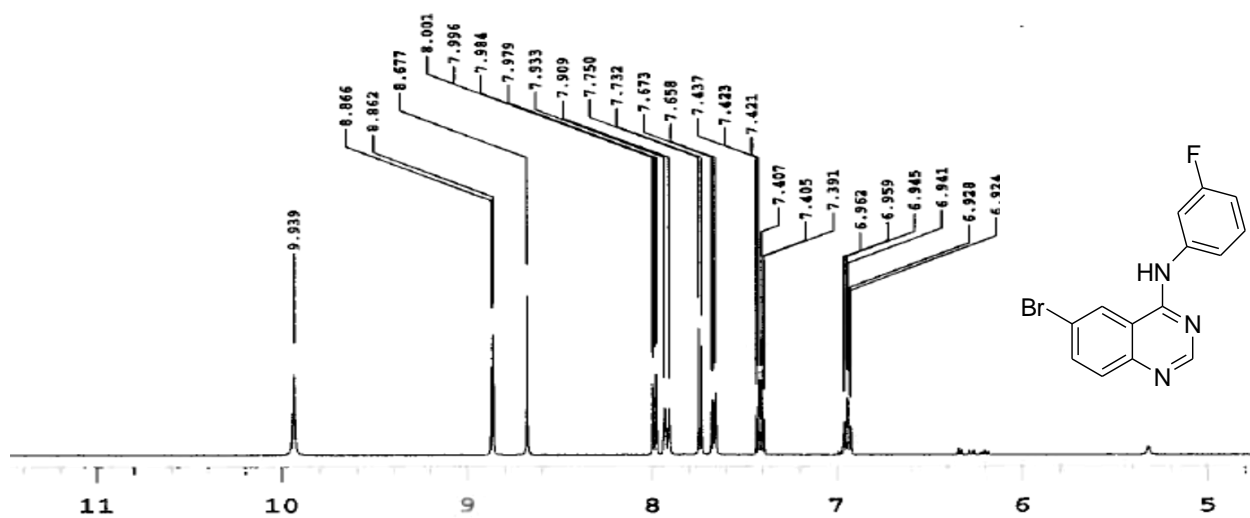

Figure 3.  $^1\text{H}$  NMR spectrum of 3b in  $\text{DMSO-}d_6$  at 500 MHz.

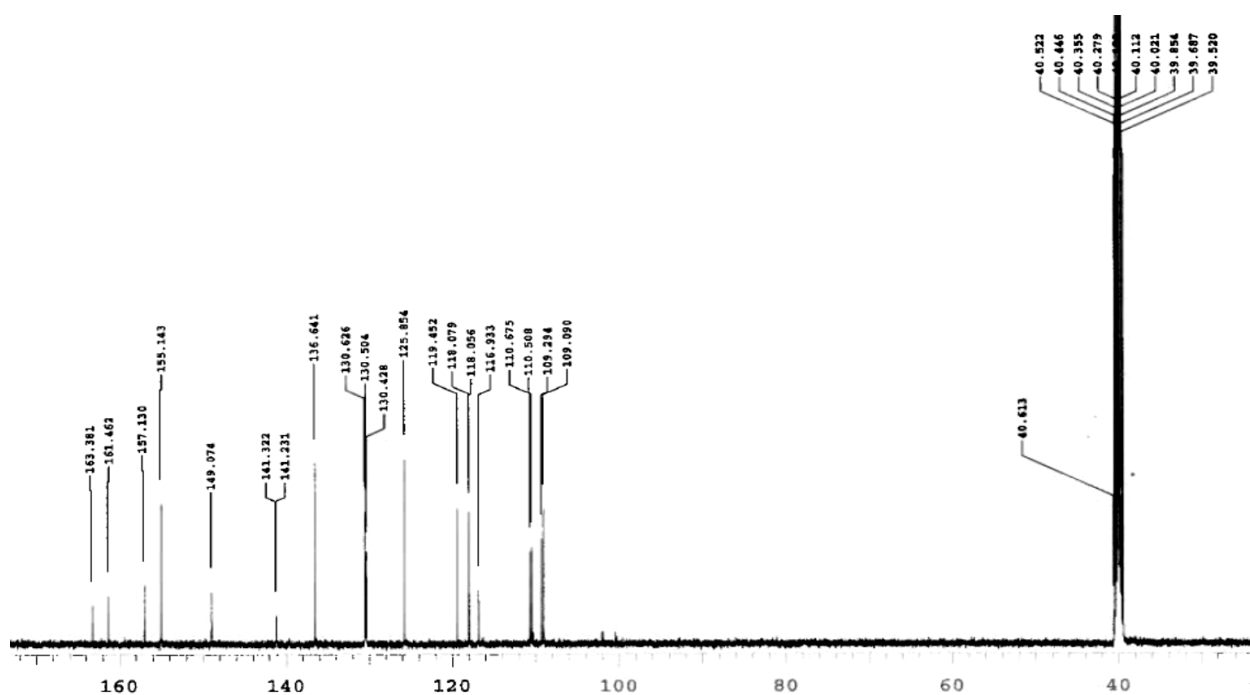

Figure 4.  $^{13}\text{C}$  NMR spectrum of 3b in  $\text{DMSO-}d_6$  at 125 MHz.

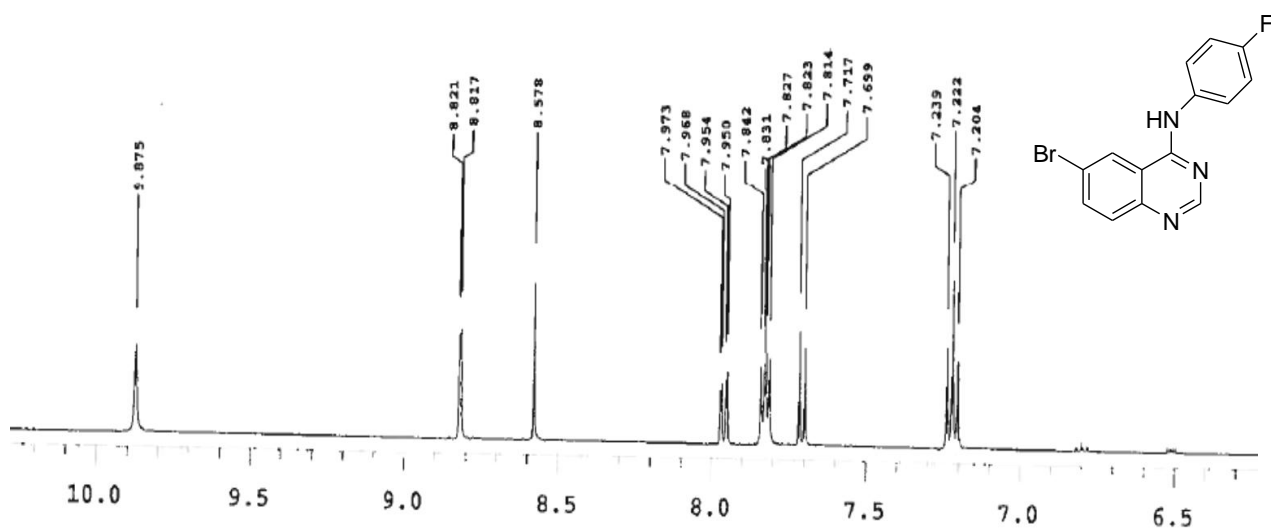

Figure 5.  $^1\text{H}$  NMR spectrum of 3c in  $\text{DMSO-}d_6$  at 500 MHz.

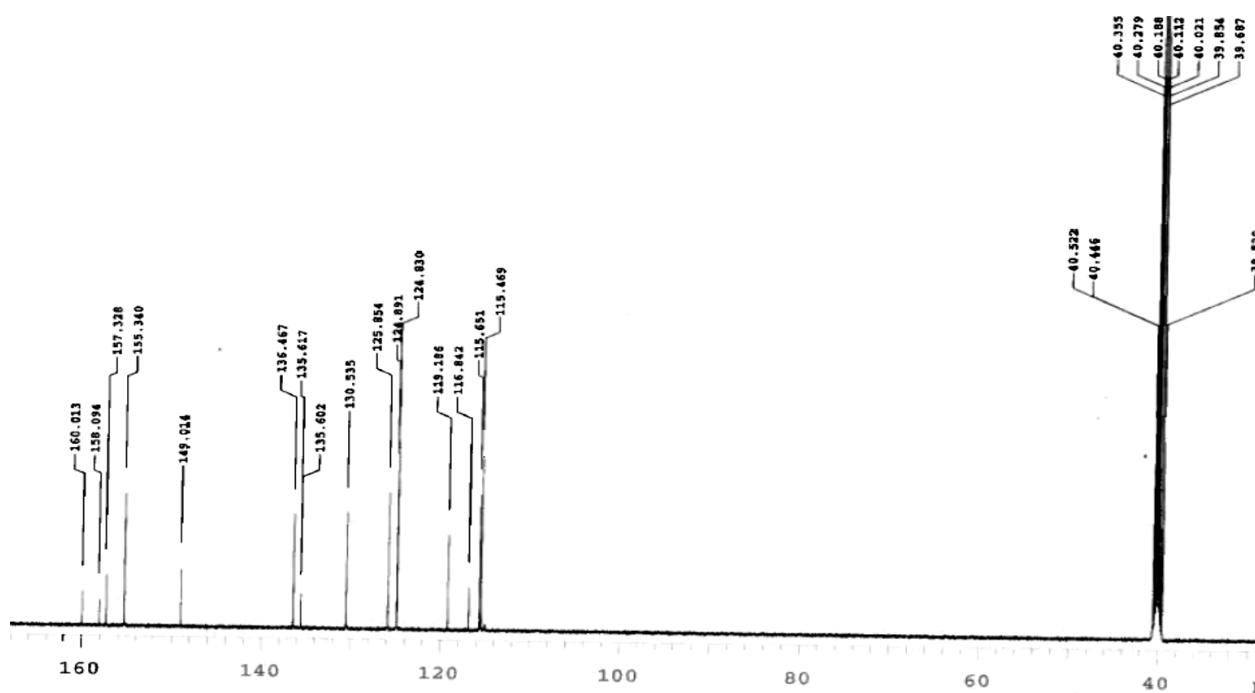

Figure 6.  $^{13}\text{C}$  NMR spectrum of 3c in  $\text{DMSO-}d_6$  at 125 MHz.

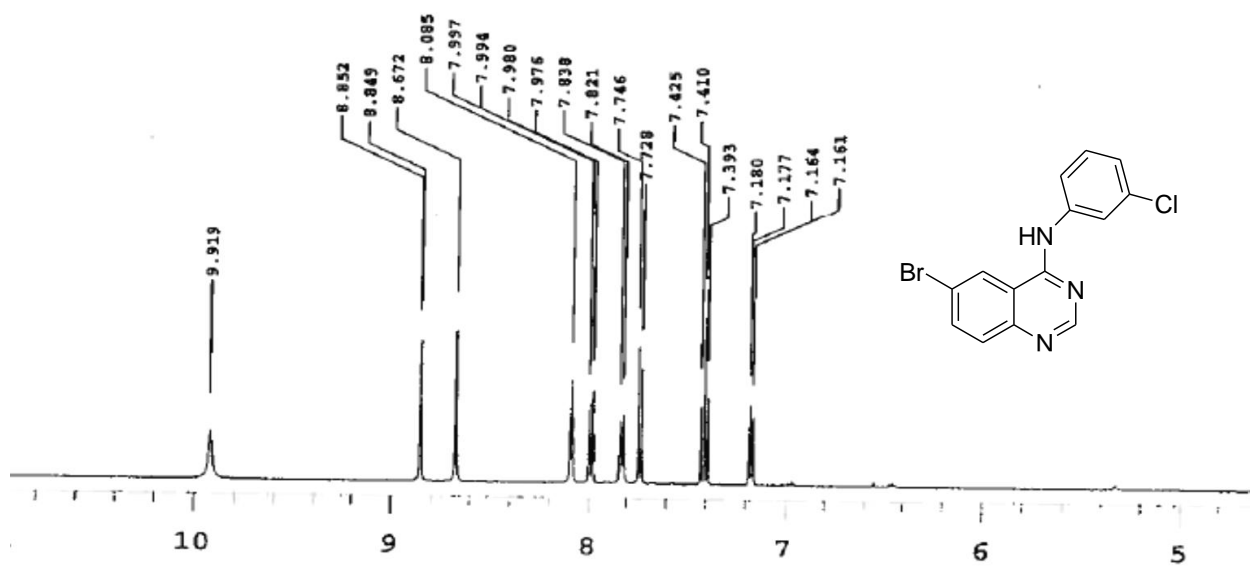

Figure 7.  $^1\text{H}$  NMR spectrum of 3d in  $\text{DMSO-}d_6$  at 500 MHz.

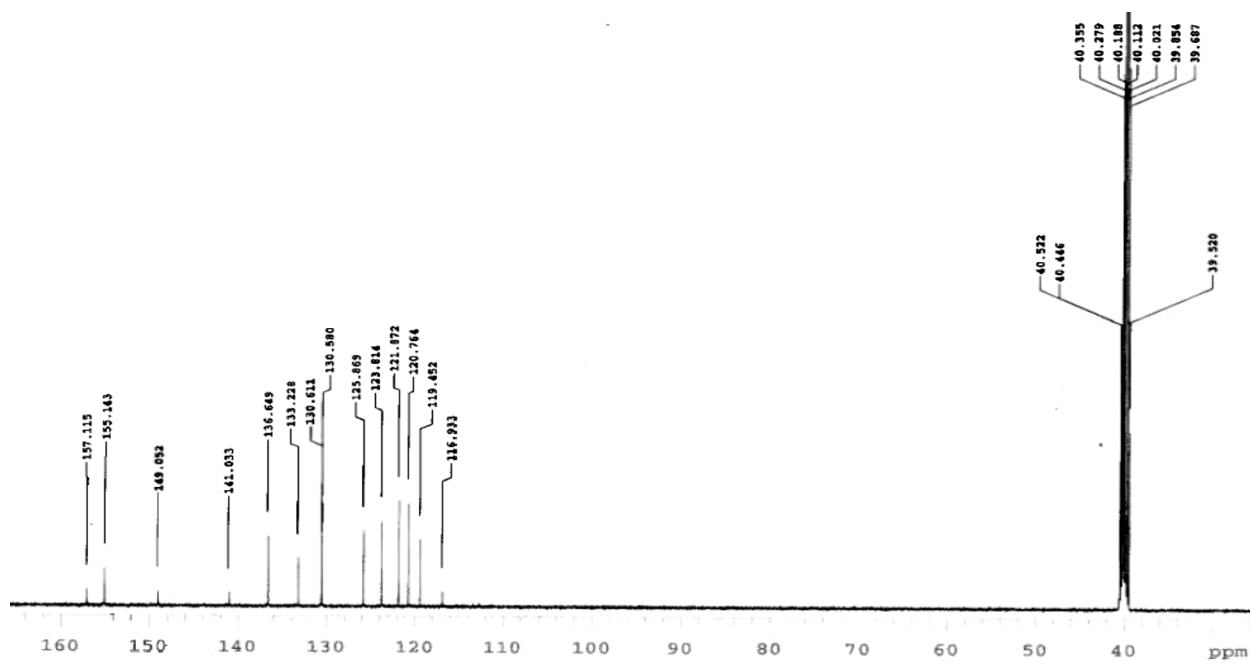

Figure 8.  $^{13}\text{C}$  NMR spectrum of 3d in  $\text{DMSO-}d_6$  at 125 MHz.

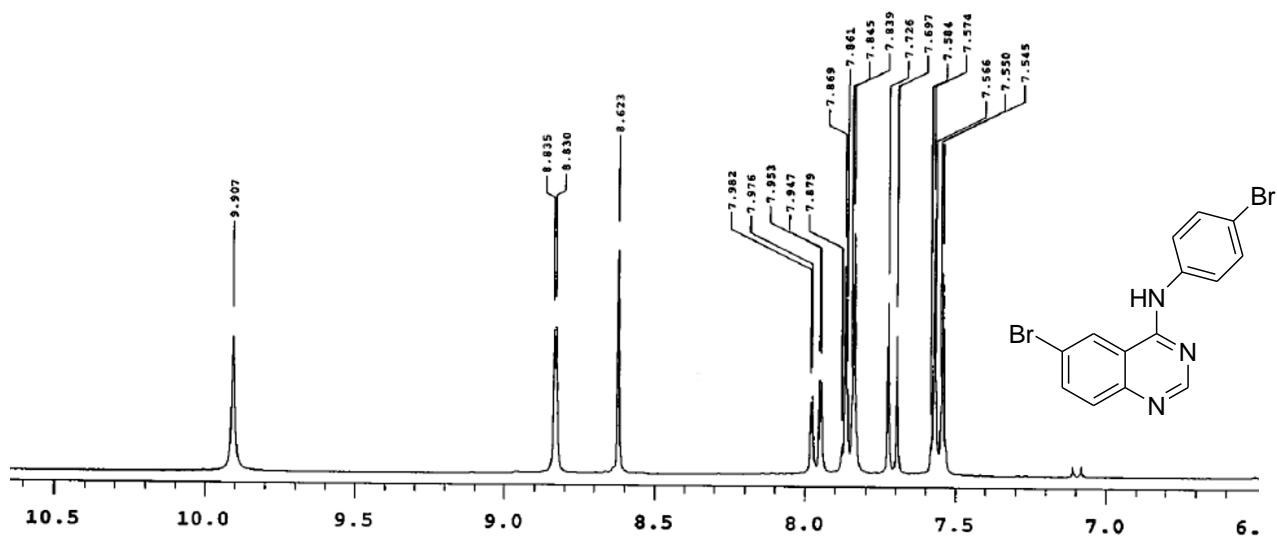

Figure 9.  $^1\text{H}$  NMR spectrum of 3e in  $\text{DMSO-}d_6$  at 500 MHz.

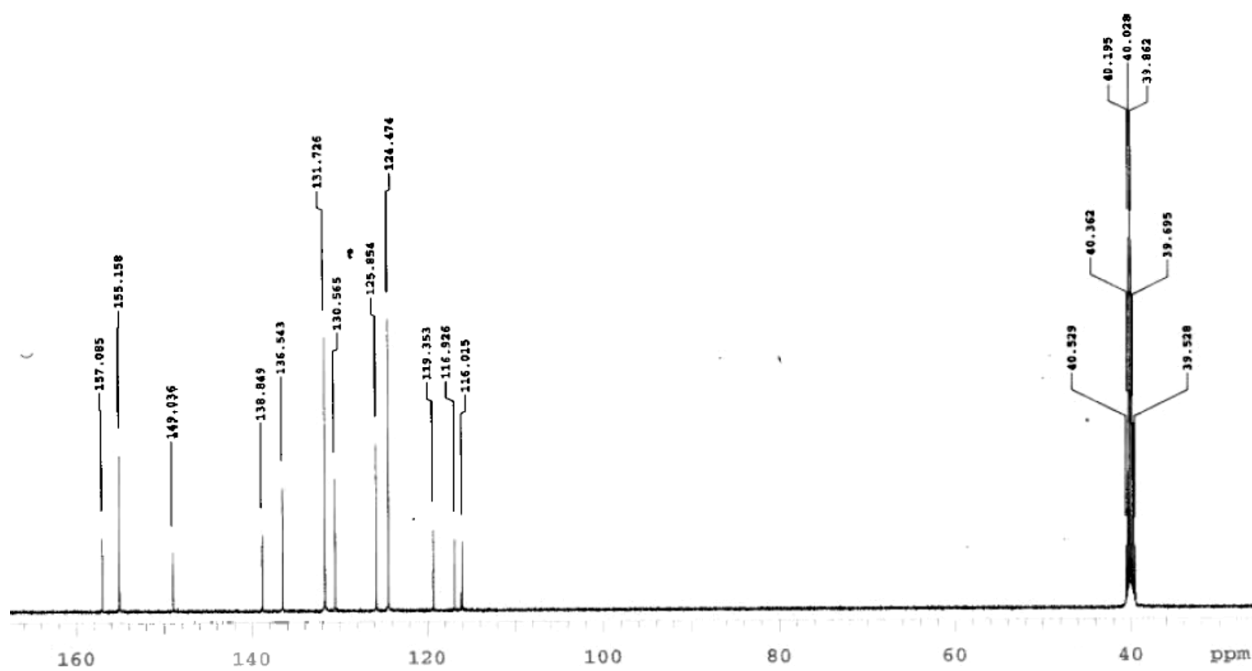

Figure 10.  $^{13}\text{C}$  NMR spectrum of 3e in  $\text{DMSO-}d_6$  at 125 MHz.

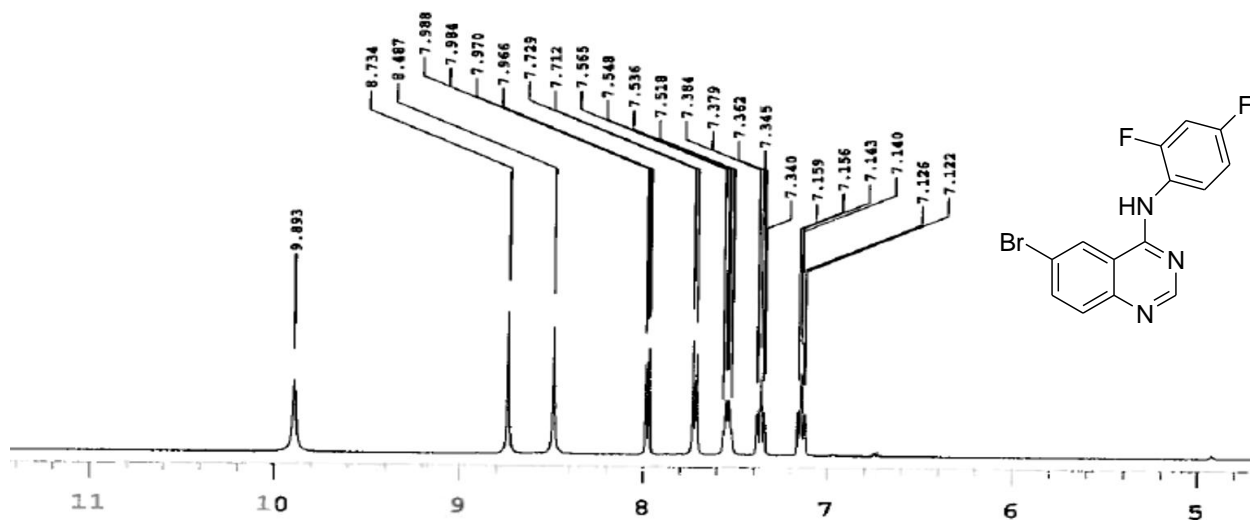

Figure 11.  $^1\text{H}$  NMR spectrum of 3f in  $\text{DMSO-}d_6$  at 500 MHz.

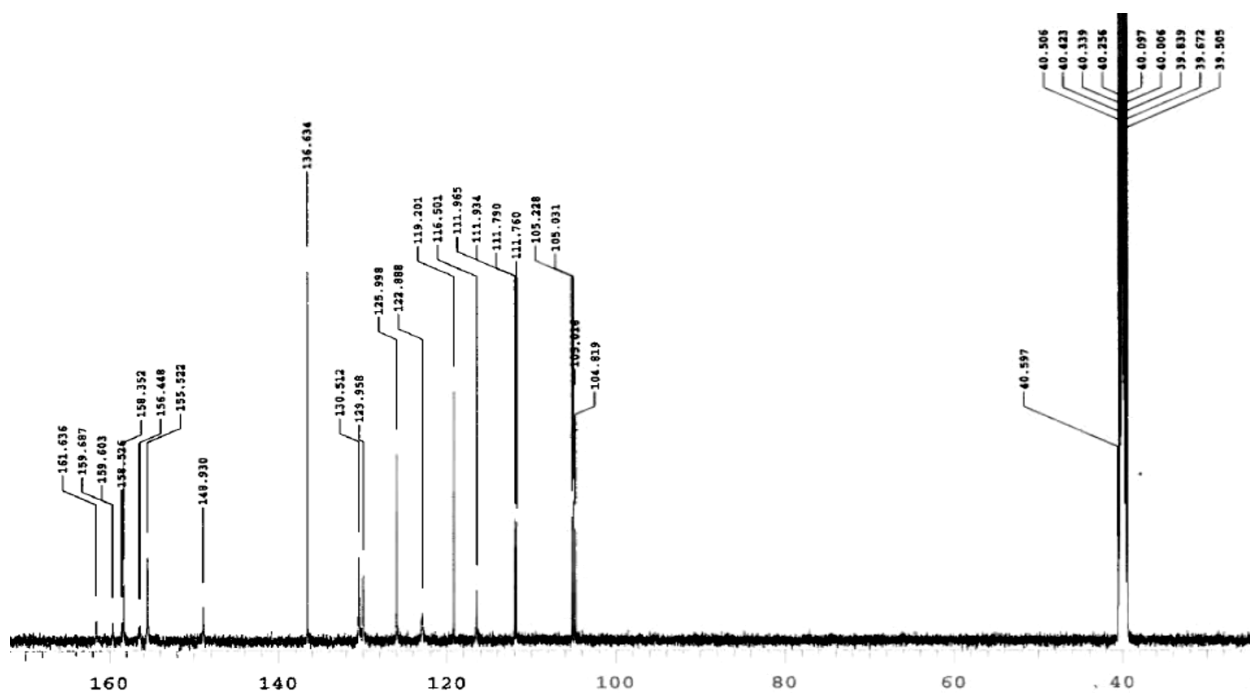

Figure 12.  $^{13}\text{C}$  NMR spectrum of 3f in  $\text{DMSO-}d_6$  at 125 MHz.

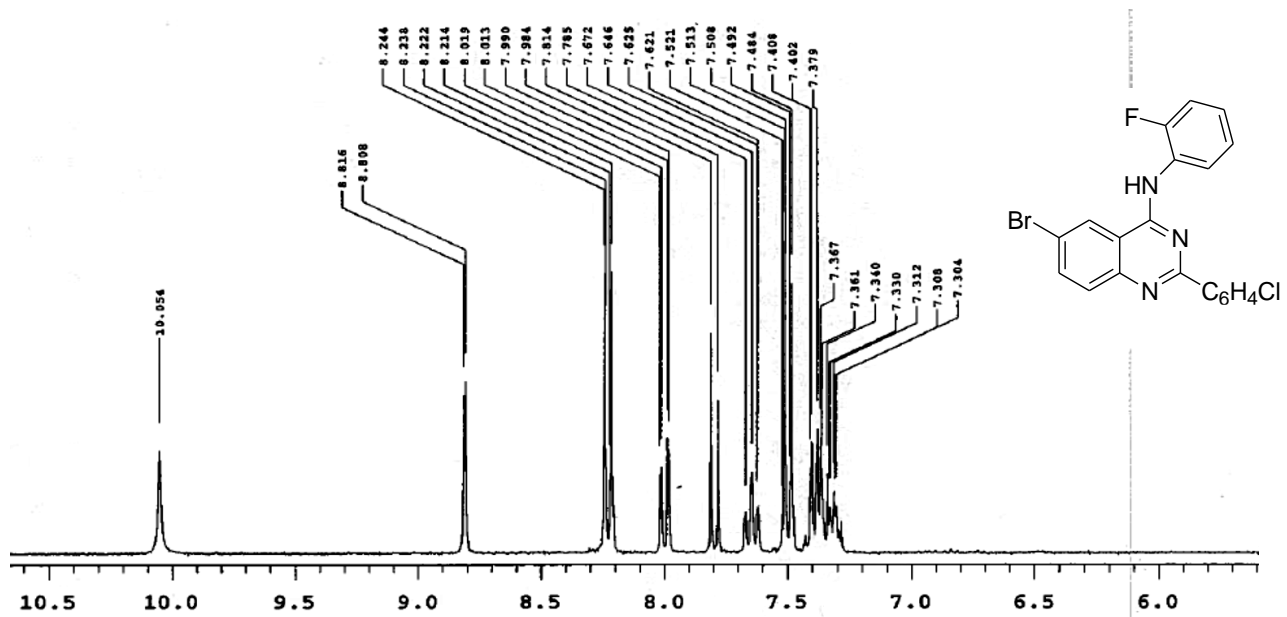

Figure 13.  $^1\text{H}$  NMR spectrum of 3g in  $\text{DMSO-}d_6$  at 500 MHz.

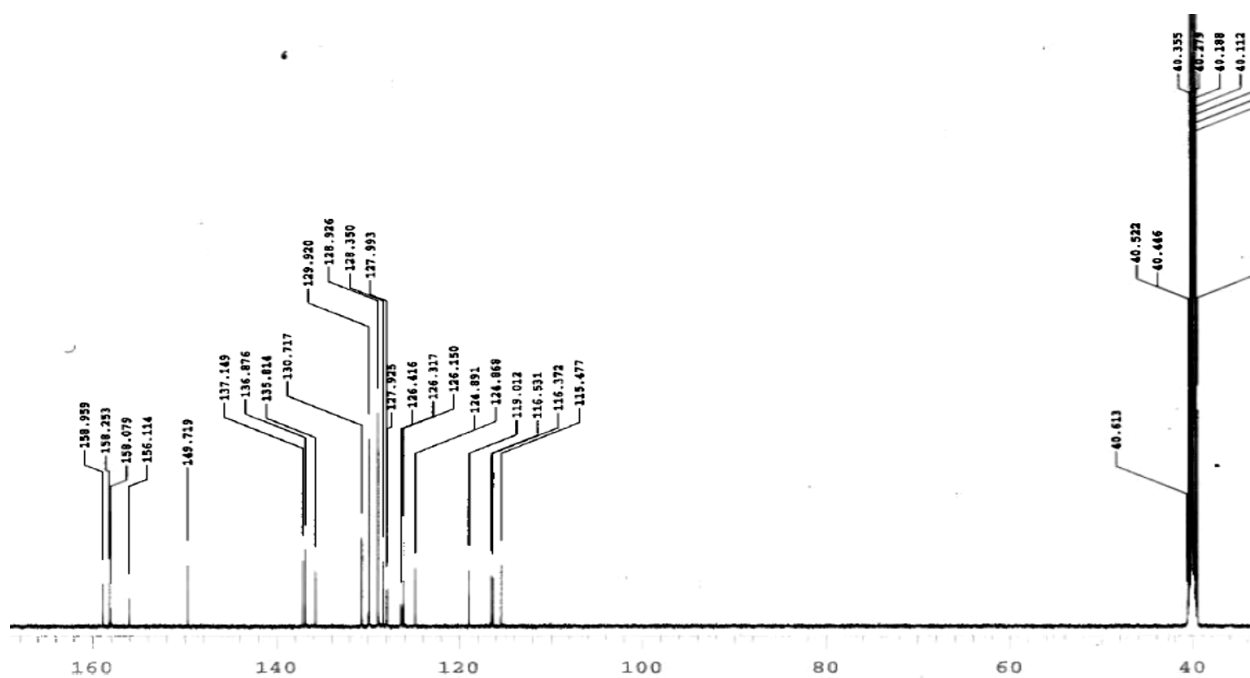

Figure 14.  $^{13}\text{C}$  NMR spectrum of 3g in  $\text{DMSO-}d_6$  at 125 MHz.

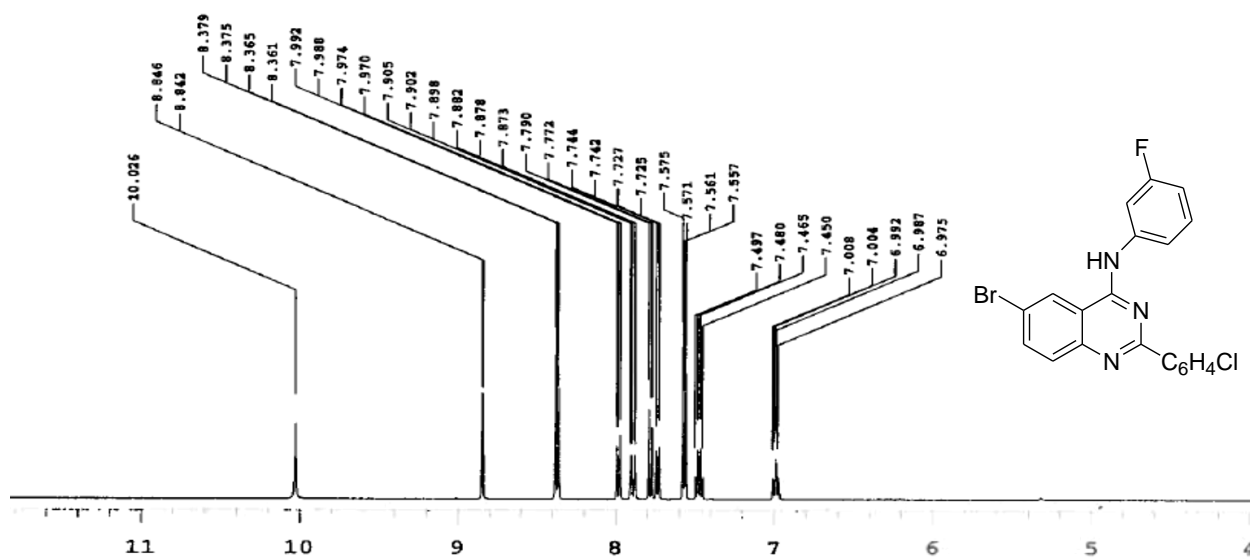

Figure 15.  $^1\text{H}$  NMR spectrum of 3h in  $\text{DMSO-}d_6$  at 500 MHz.

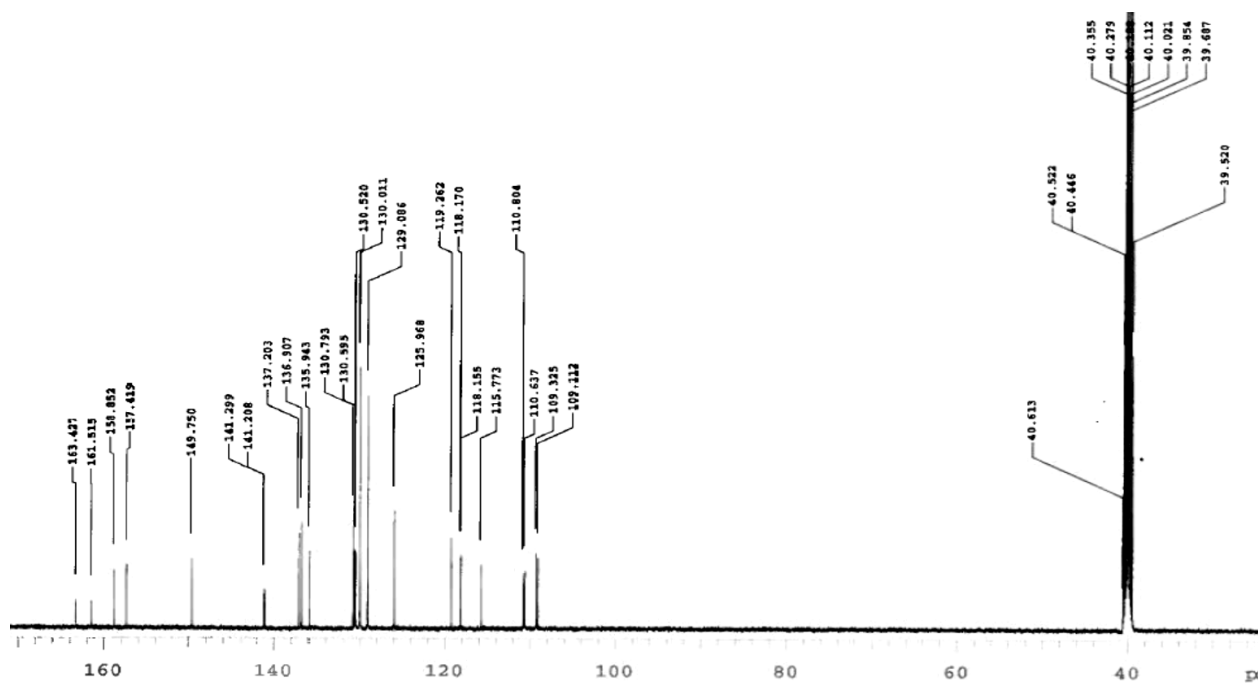

Figure 16.  $^{13}\text{C}$  NMR spectrum of 3h in  $\text{DMSO-}d_6$  at 125 MHz.



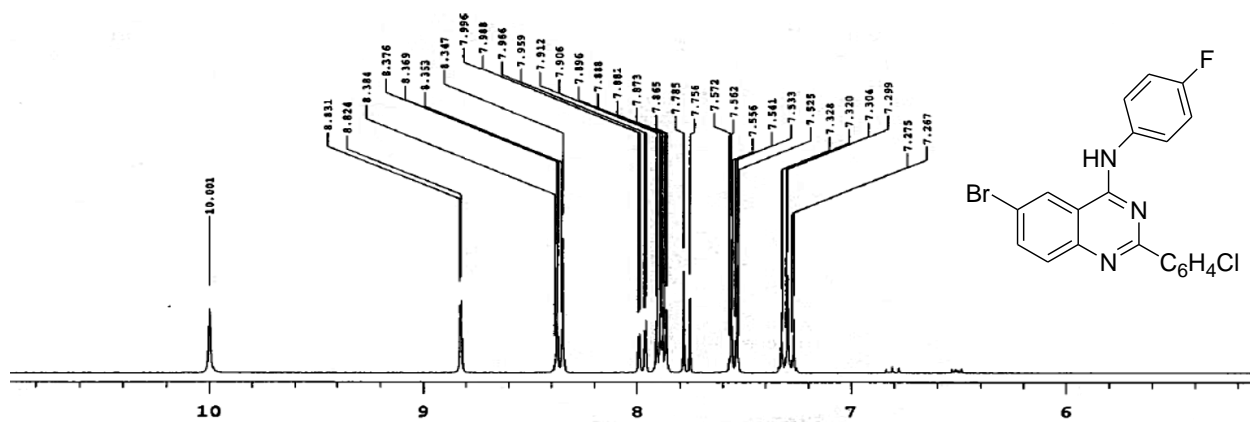

Figure 17.  $^1\text{H}$  NMR spectrum of 3i in  $\text{DMSO-}d_6$  at 500 MHz.

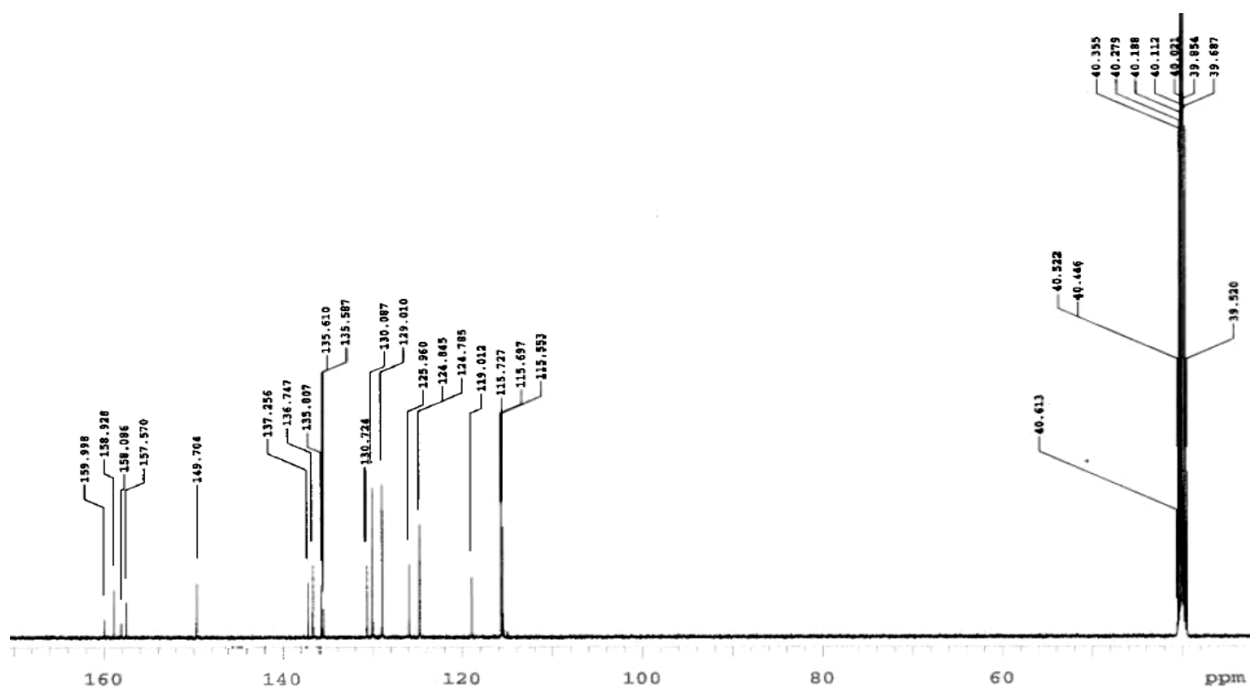

Figure 18.  $^{13}\text{C}$  NMR spectrum of 3i in  $\text{DMSO-}d_6$  at 125 MHz.

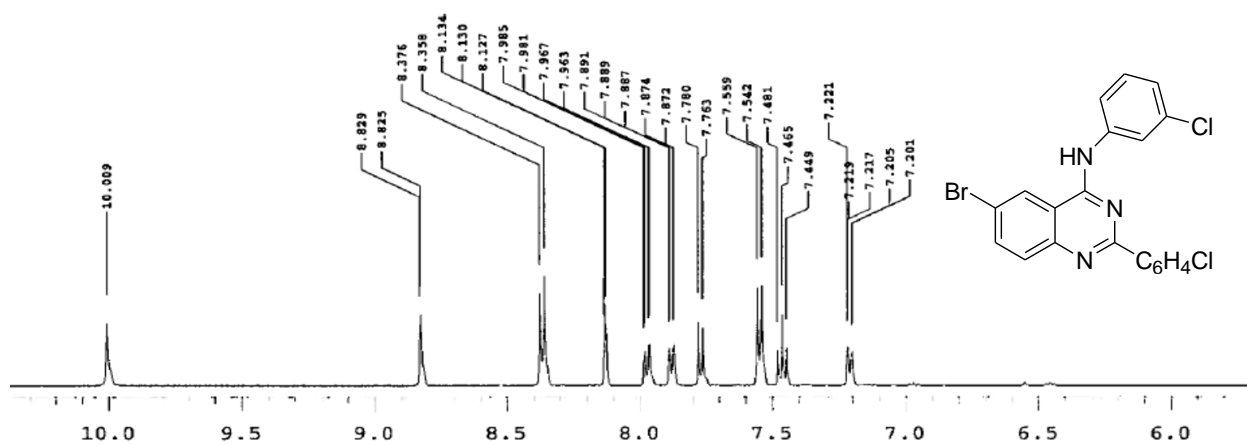

Figure 19.  $^1\text{H}$  NMR spectrum of 3j in  $\text{DMSO-}d_6$  at 500 MHz.

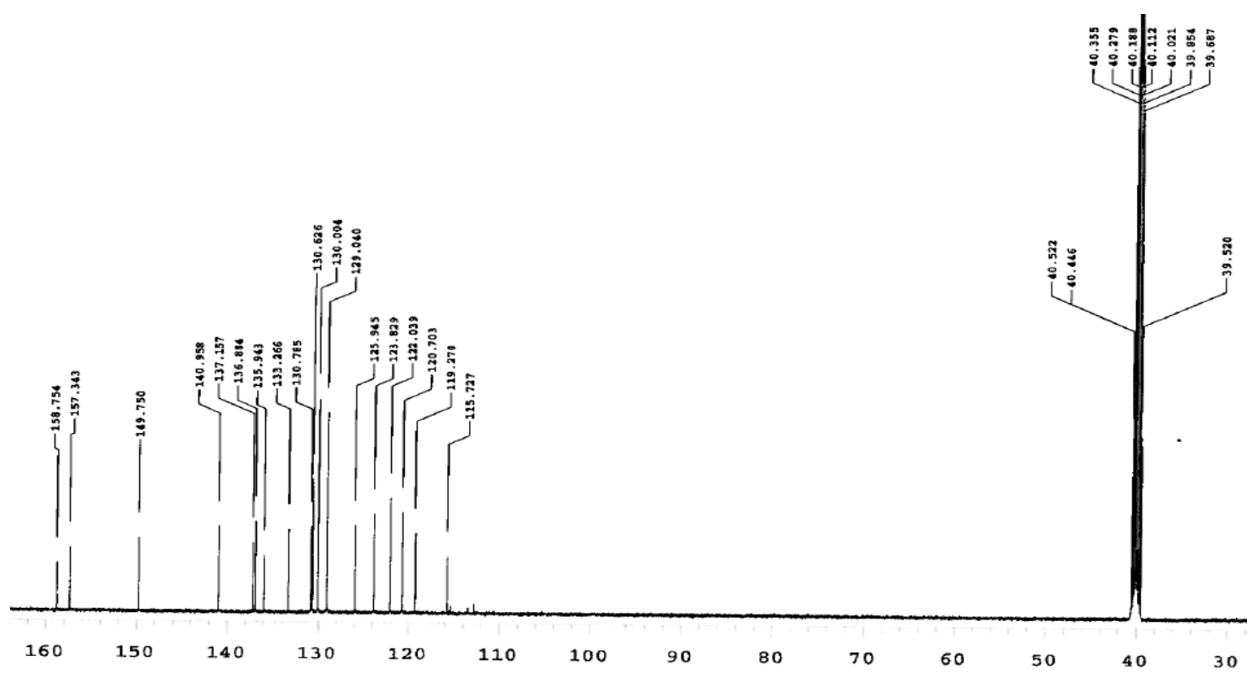

Figure 20.  $^{13}\text{C}$  NMR spectrum of 3j in  $\text{DMSO-}d_6$  at 125 MHz.

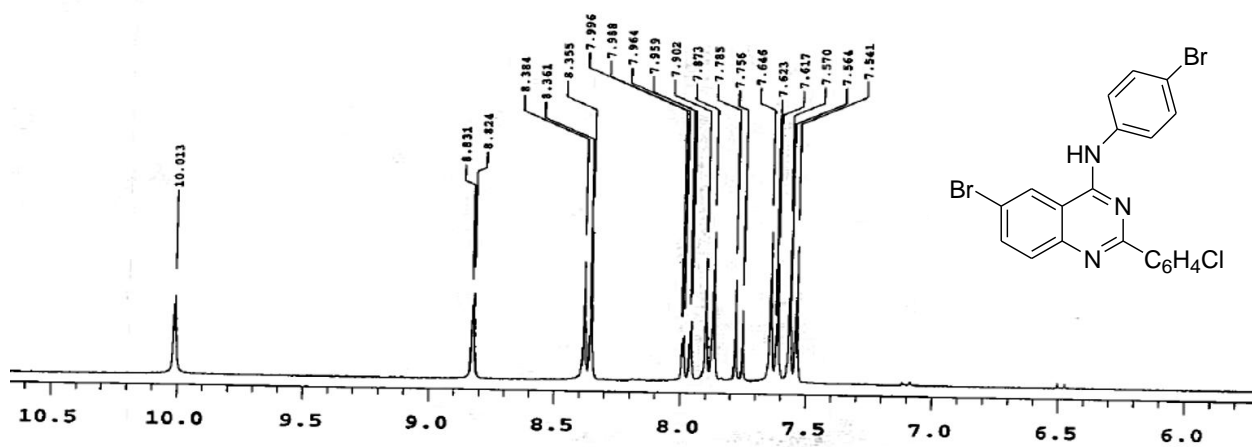

Figure 21.  $^1\text{H}$  NMR spectrum of 3k in  $\text{DMSO-}d_6$  at 500 MHz.

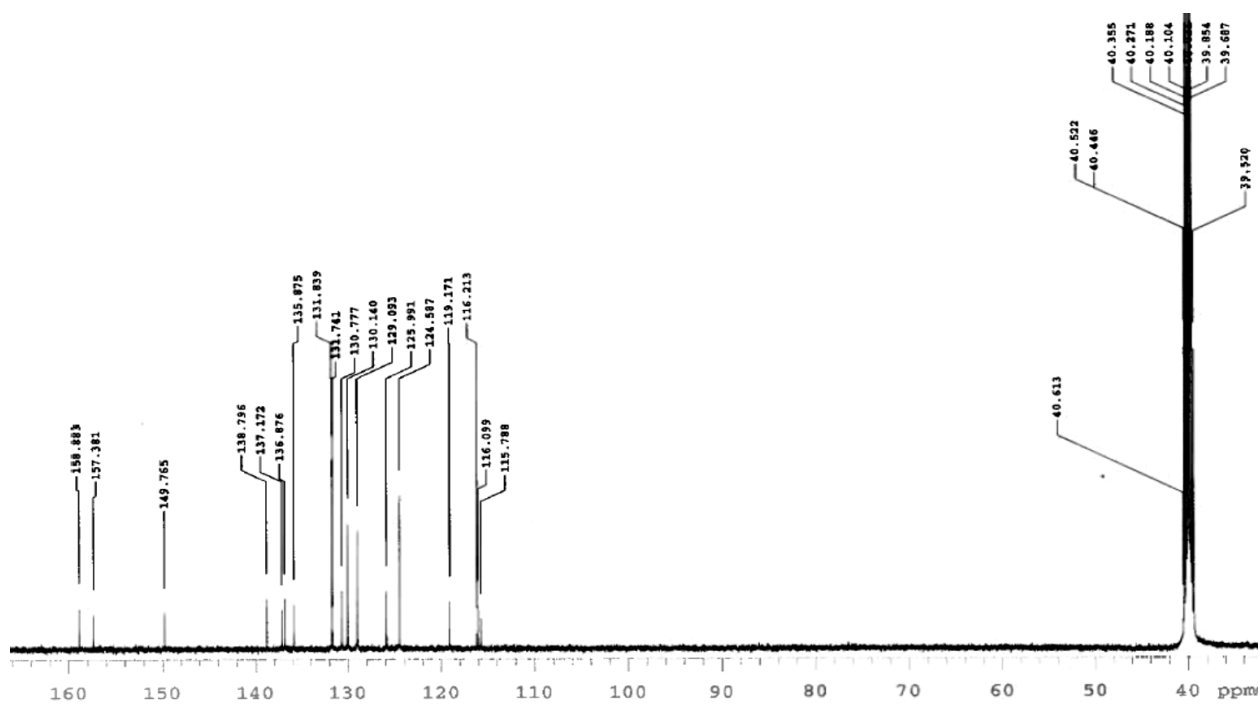

Figure 22.  $^{13}\text{C}$  NMR spectrum of 3k in  $\text{DMSO-}d_6$  at 125 MHz.

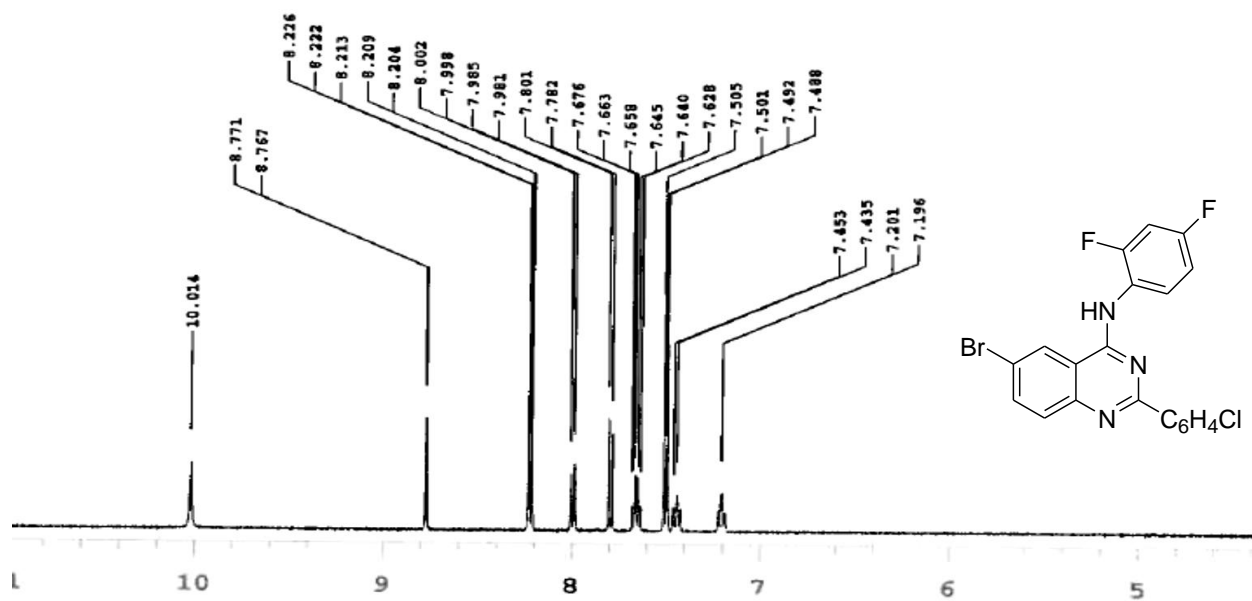

Figure 23.  $^1\text{H}$  NMR spectrum of 3l in  $\text{DMSO-}d_6$  at 500 MHz.

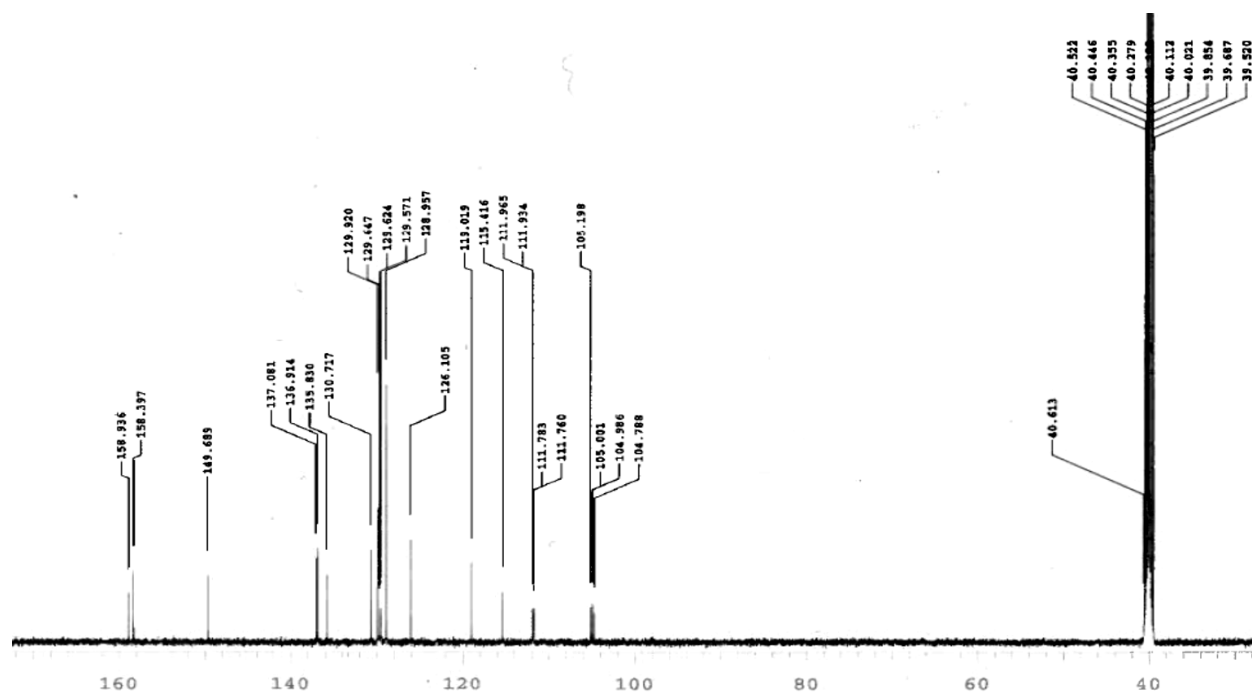

Figure 24.  $^{13}\text{C}$  NMR spectrum of 3l in  $\text{DMSO-}d_6$  at 125 MHz.

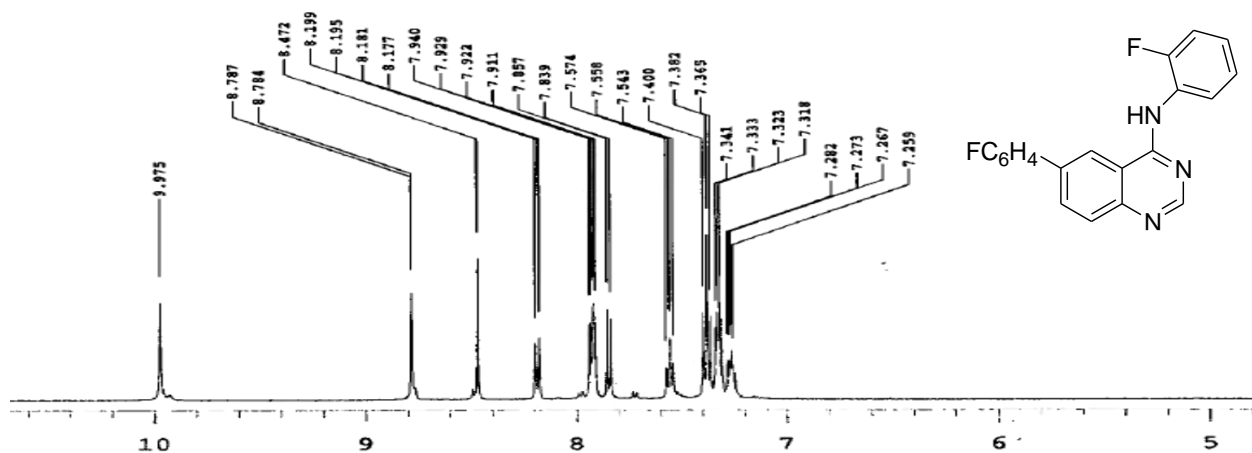

Figure 25.  $^1\text{H}$  NMR spectrum of 4a in  $\text{DMSO-}d_6$  at 500 MHz.

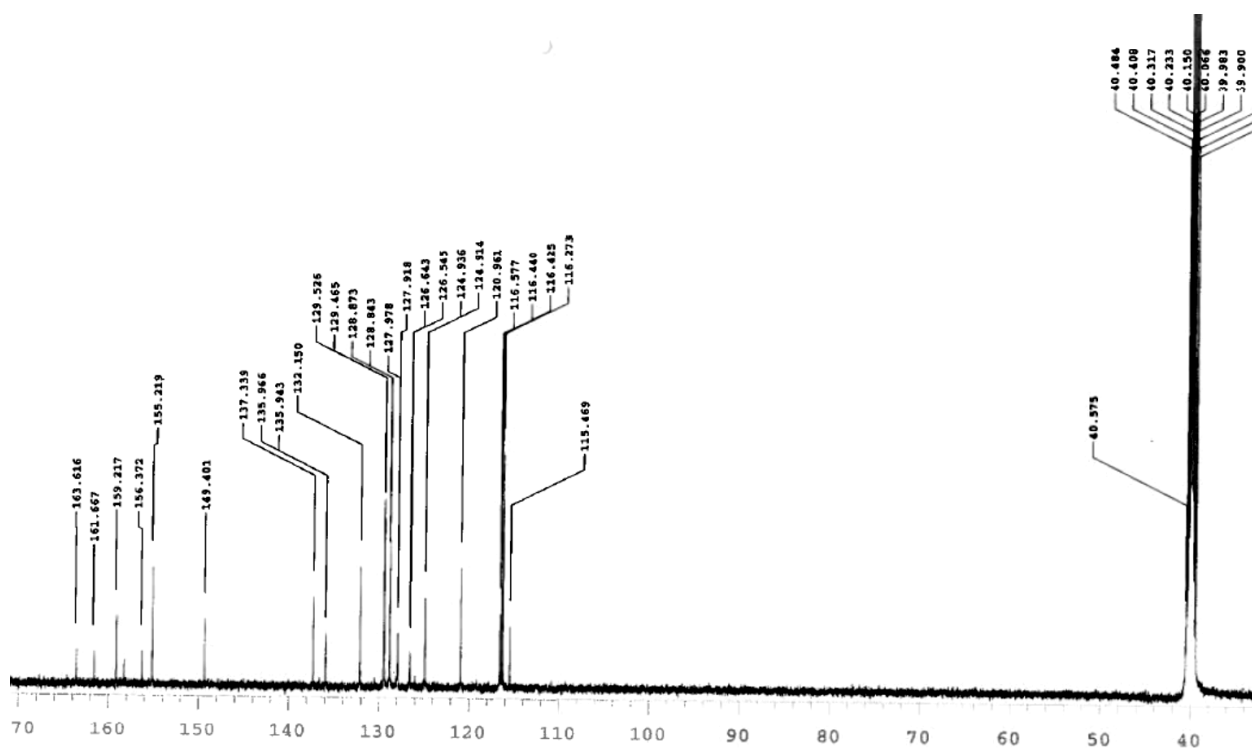

Figure 26.  $^{13}\text{C}$  NMR spectrum of 4a in  $\text{DMSO-}d_6$  at 125 MHz.

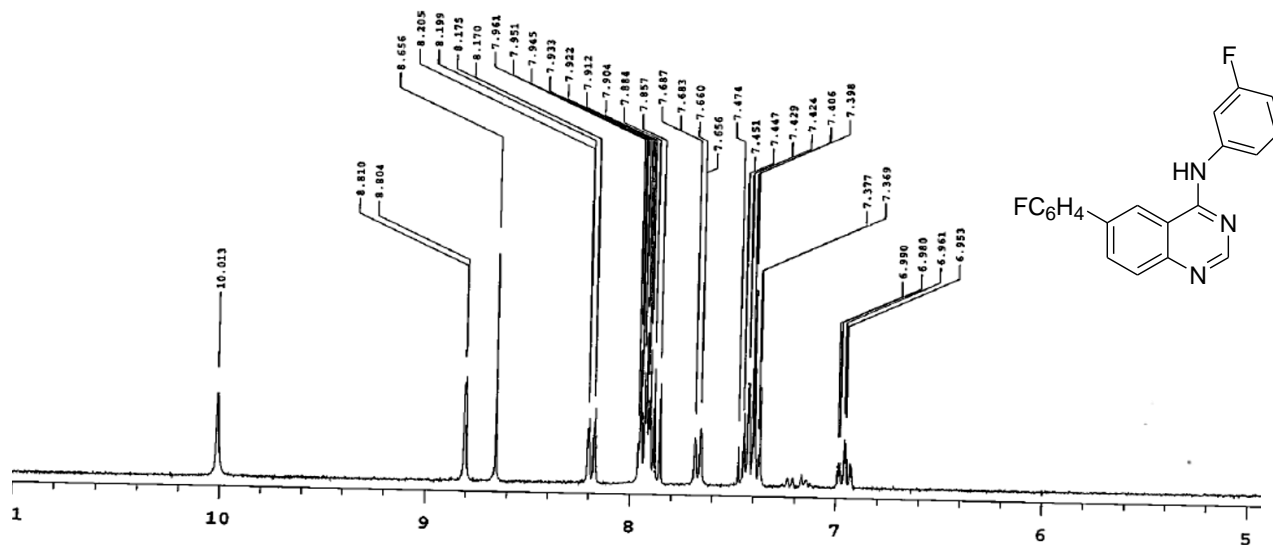

Figure 27.  $^1\text{H}$  NMR spectrum of 4b in  $\text{DMSO-}d_6$  at 500 MHz.

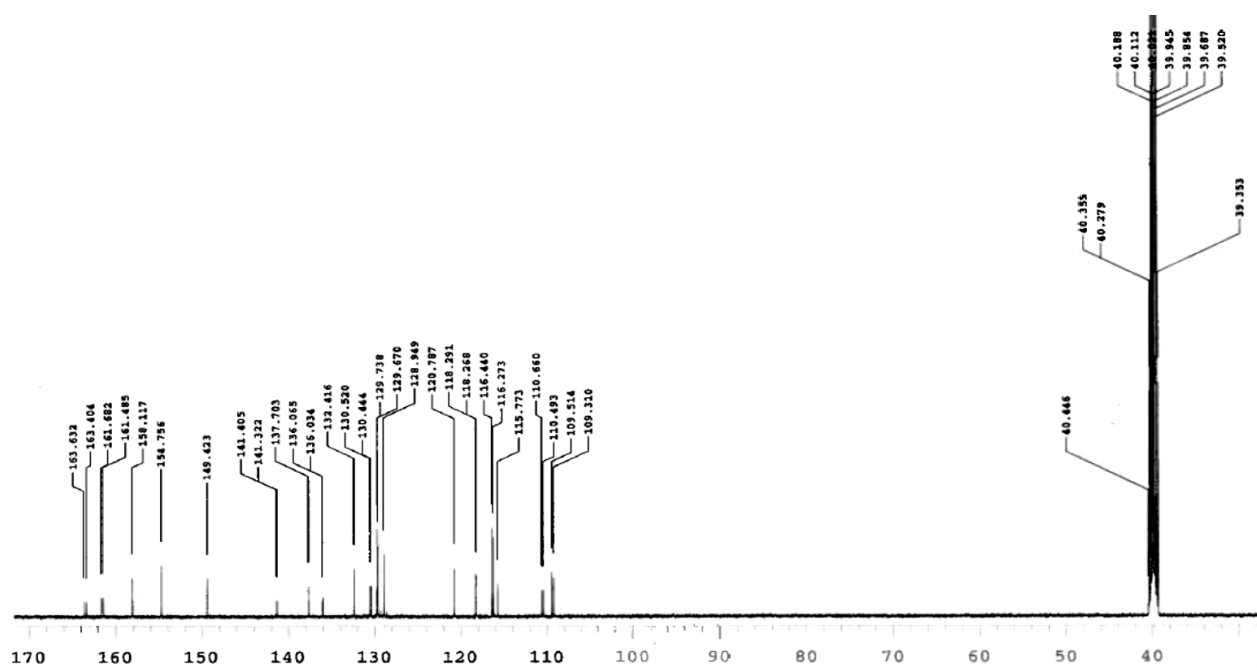

Figure 28.  $^{13}\text{C}$  NMR spectrum of 4b in  $\text{DMSO-}d_6$  at 125 MHz.

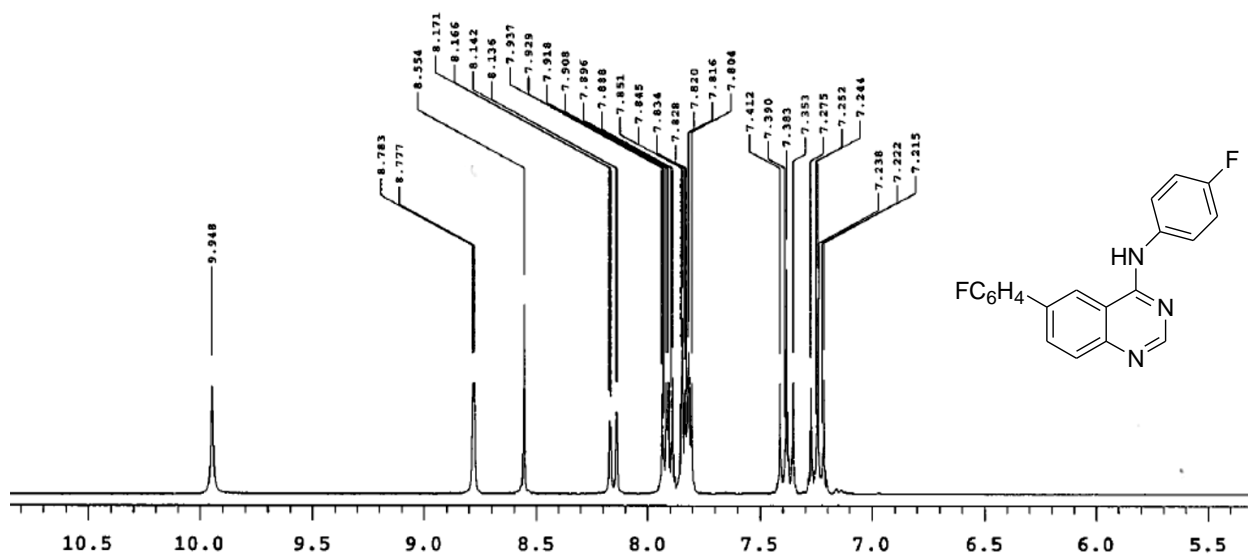

Figure 29.  $^1\text{H}$  NMR spectrum of 4c in  $\text{DMSO-}d_6$  at 500 MHz.

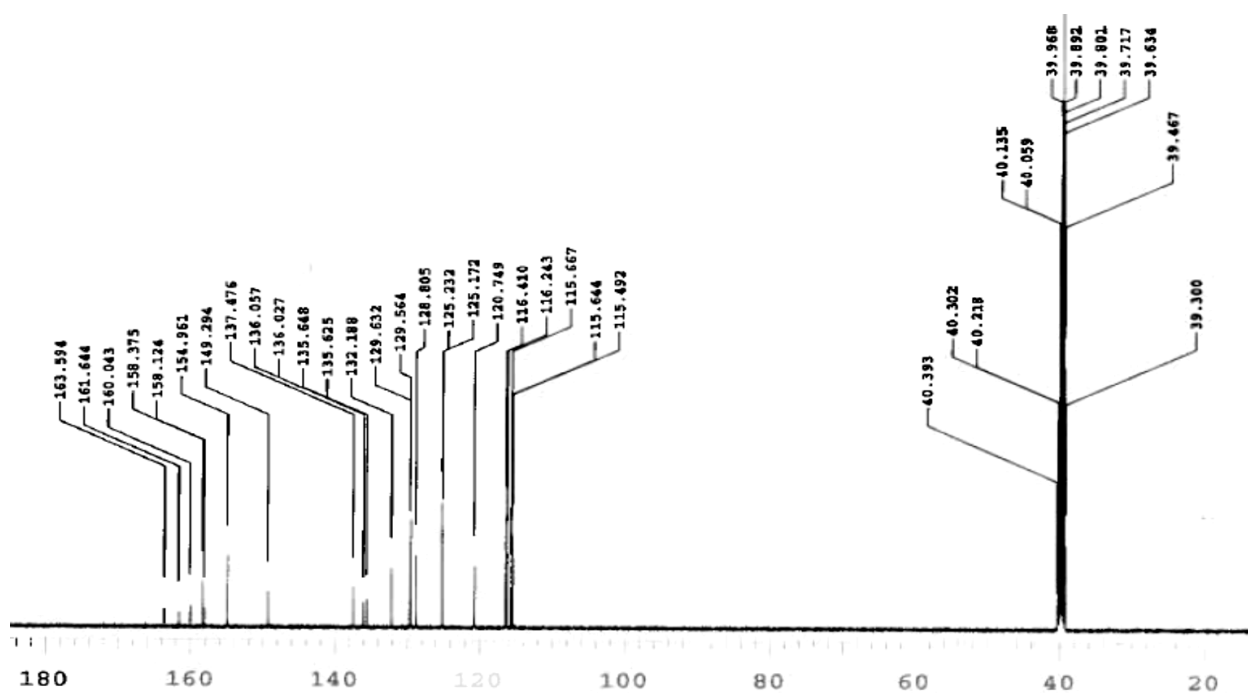

Figure 30.  $^{13}\text{C}$  NMR spectrum of 4c in  $\text{DMSO-}d_6$  at 125 MHz.

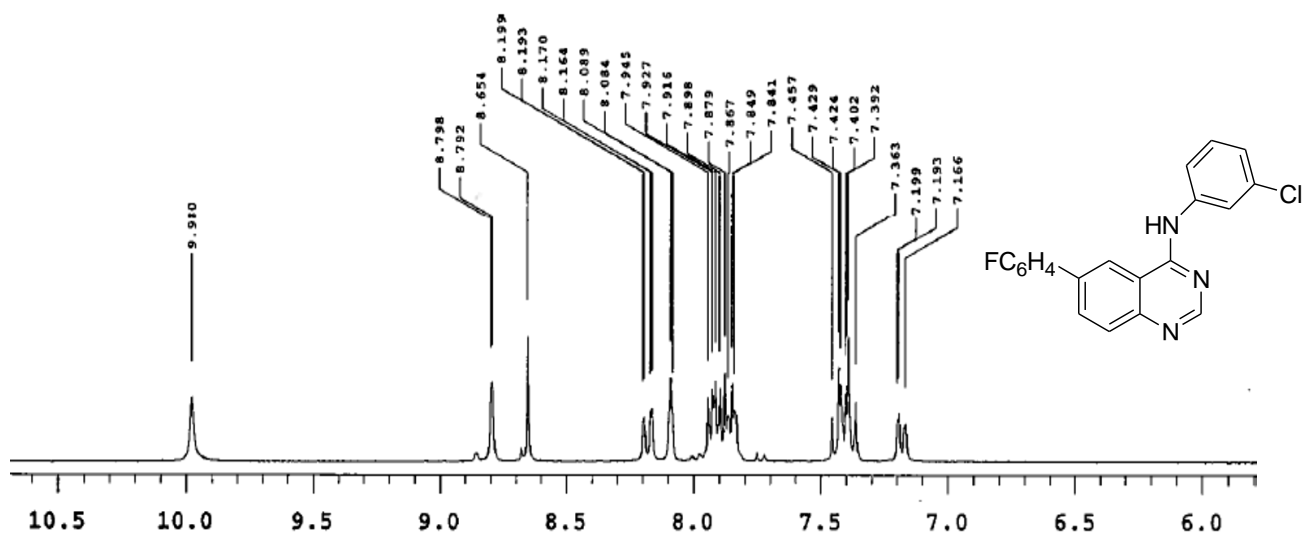

Figure 31.  $^1\text{H}$  NMR spectrum of 4d in  $\text{DMSO-}d_6$  at 500 MHz.

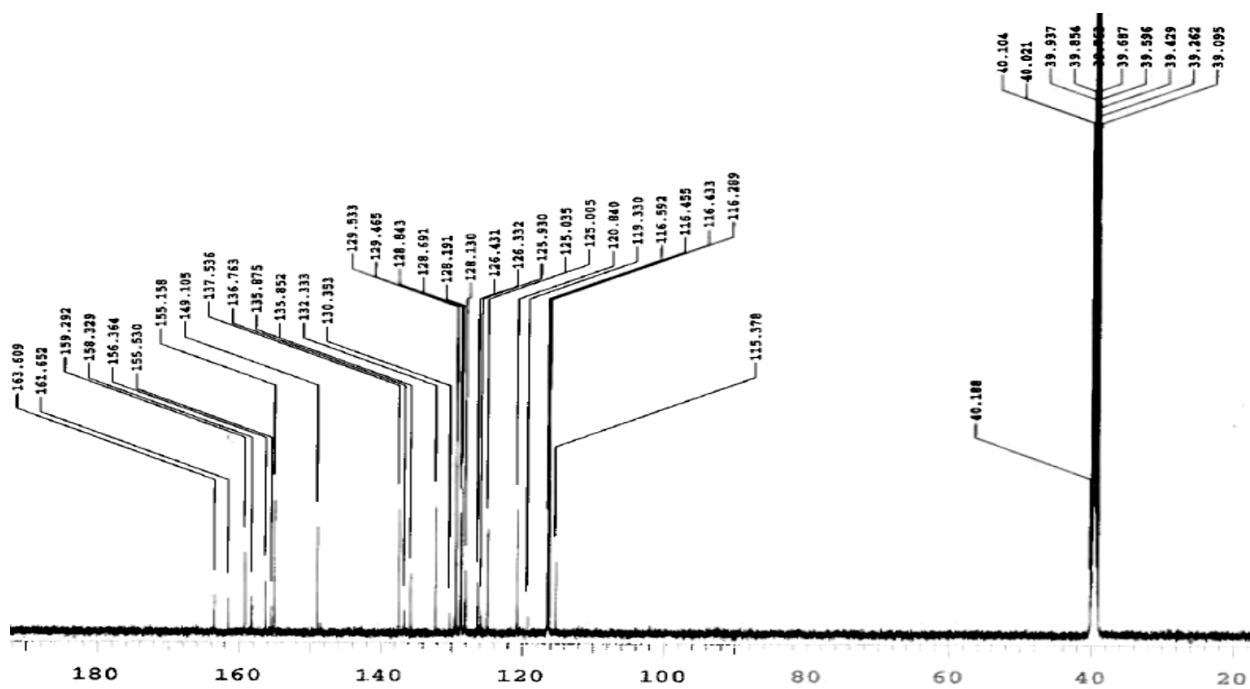

Figure 32.  $^{13}\text{C}$  NMR spectrum of 4d in  $\text{DMSO-}d_6$  at 125 MHz.



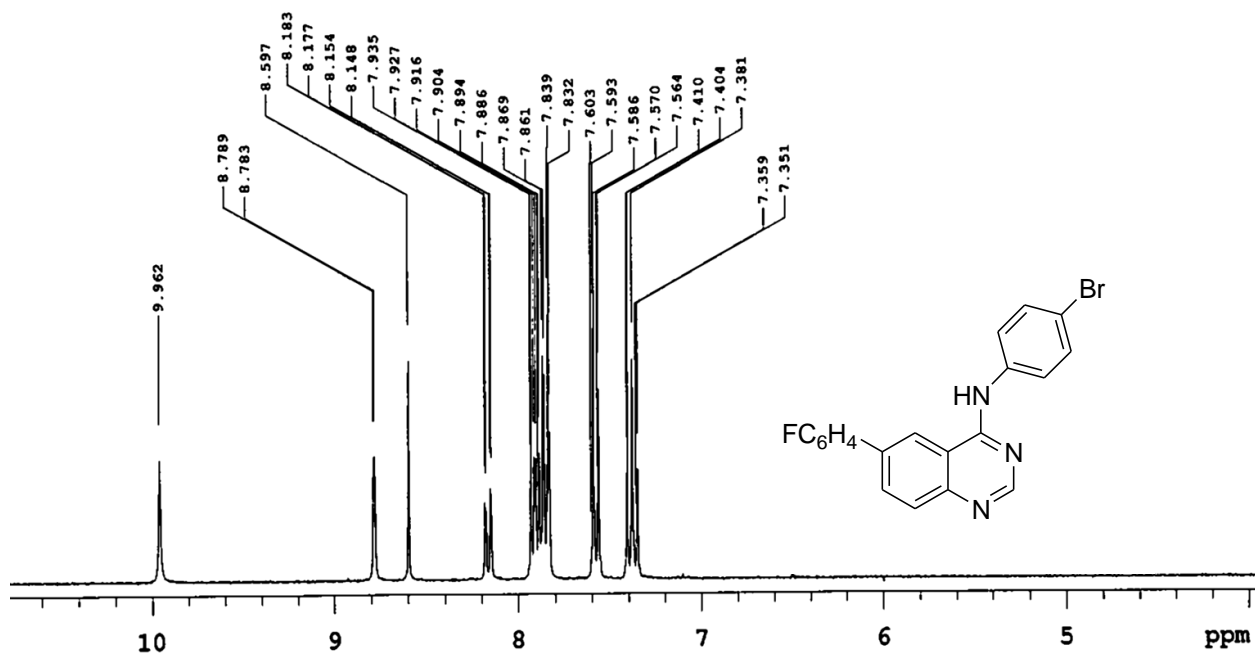

Figure 33. <sup>1</sup>H NMR spectrum of 4e in DMSO-*d*<sub>6</sub> at 500 MHz.

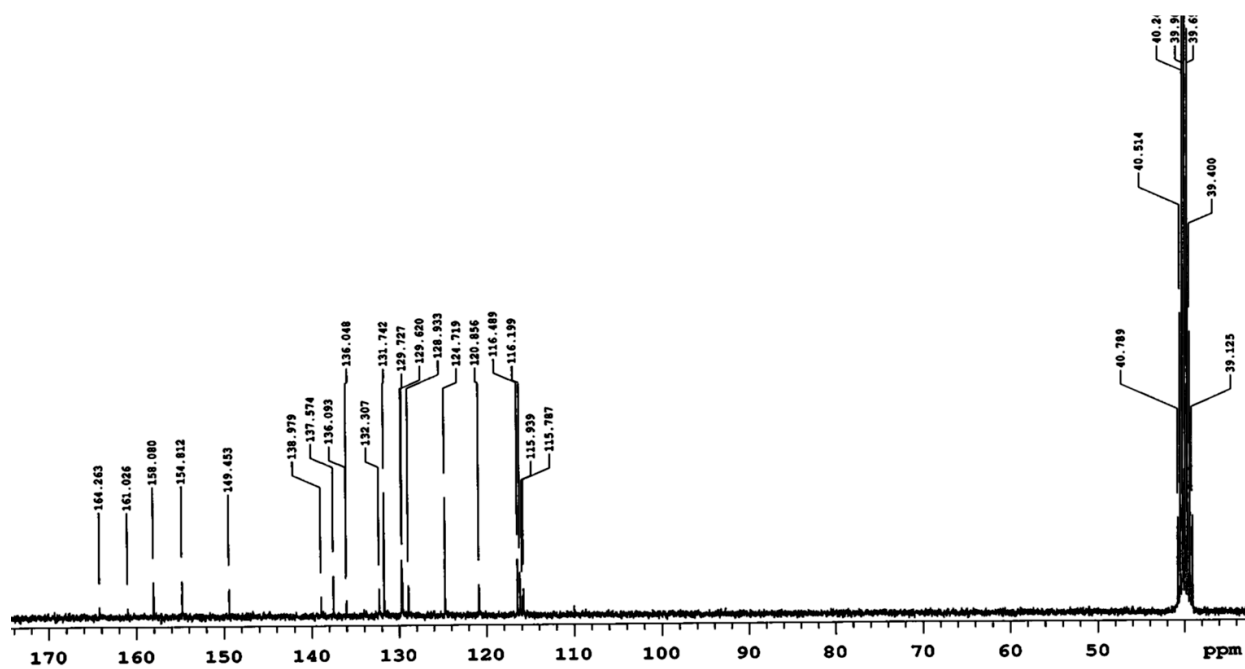

Figure 34. <sup>13</sup>C NMR spectrum of 4e in DMSO-*d*<sub>6</sub> at 125 MHz.

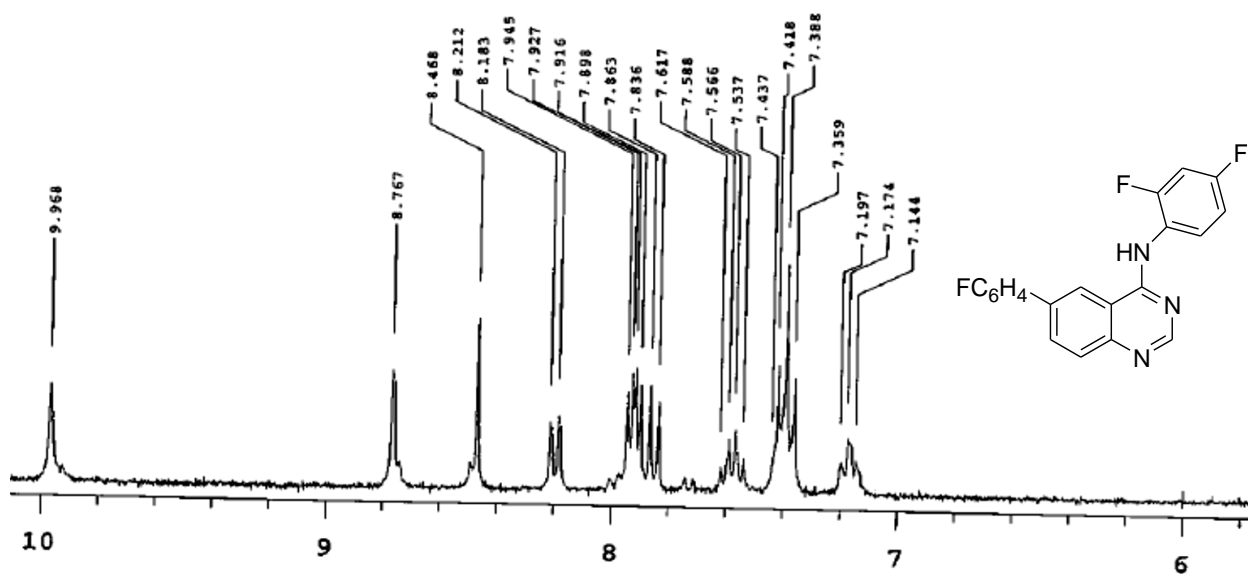

Figure 35.  $^1\text{H}$  NMR spectrum of 4f in  $\text{DMSO-}d_6$  at 500 MHz.

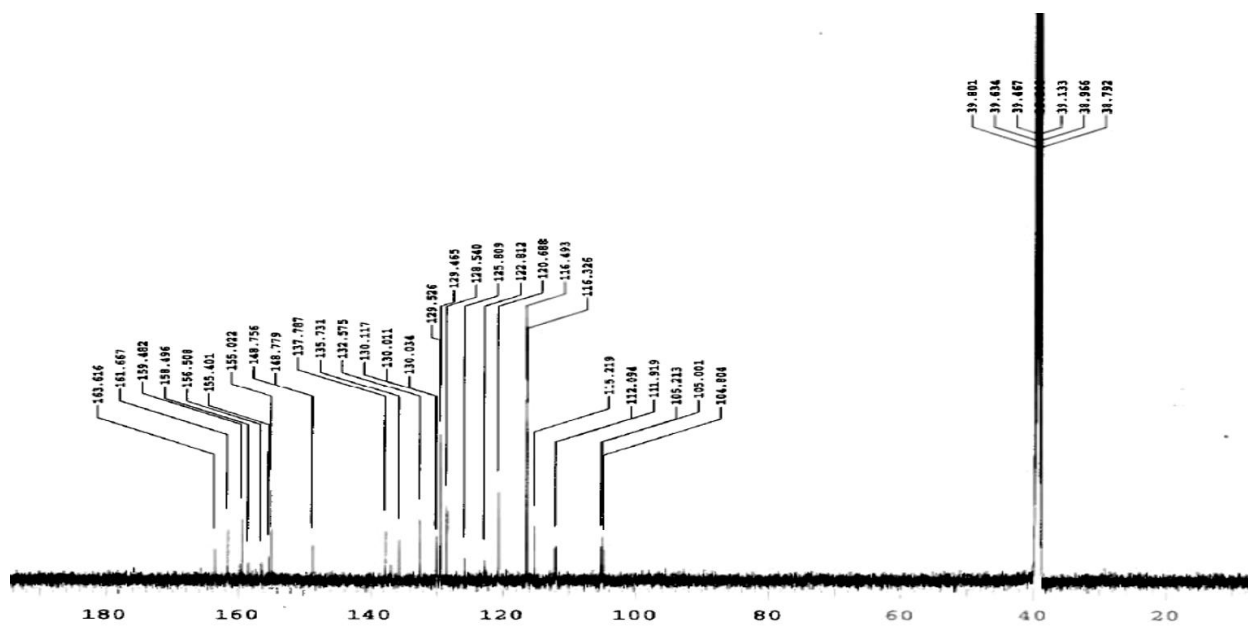

Figure 36.  $^{13}\text{C}$  NMR spectrum of 4f in  $\text{DMSO-}d_6$  at 125 MHz.

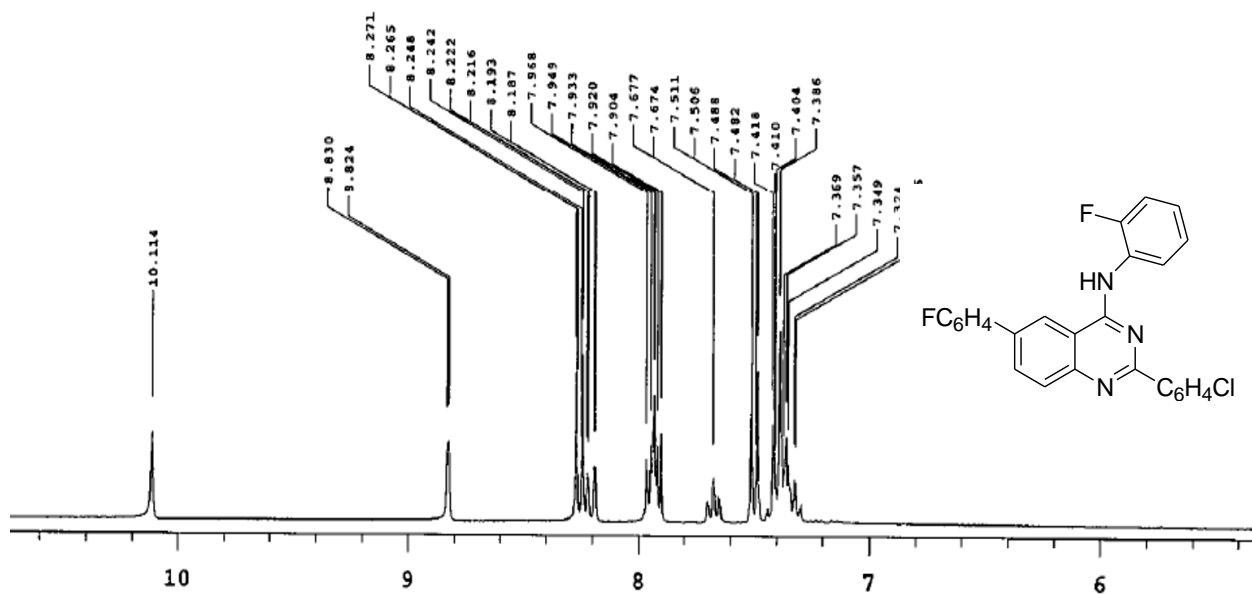

Figure 37.  $^1\text{H}$  NMR spectrum of 4g in  $\text{DMSO-}d_6$  at 500 MHz.

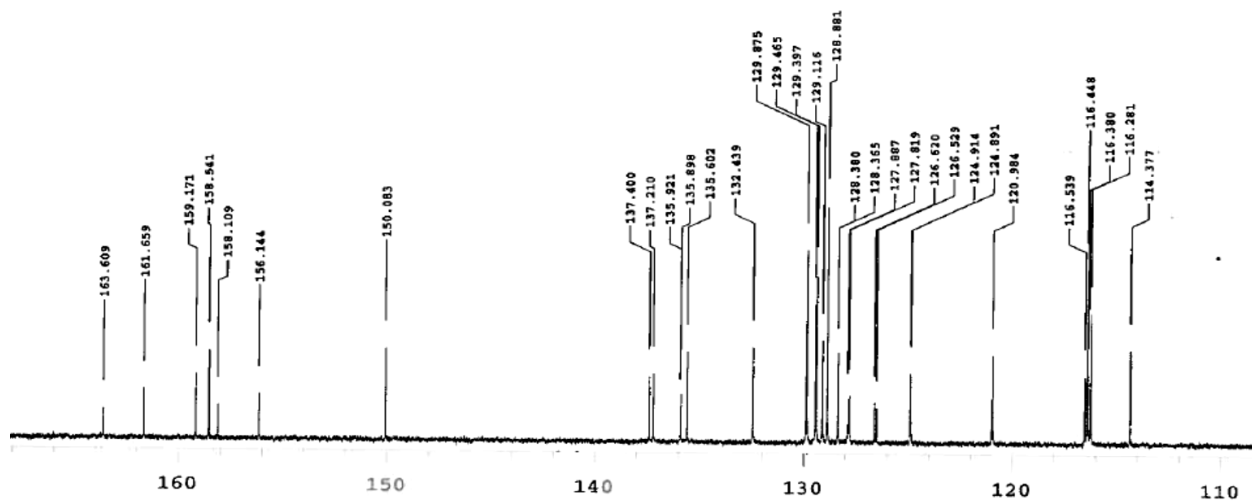

Figure 38.  $^{13}\text{C}$  NMR spectrum of 4g in  $\text{DMSO-}d_6$  at 125 MHz.

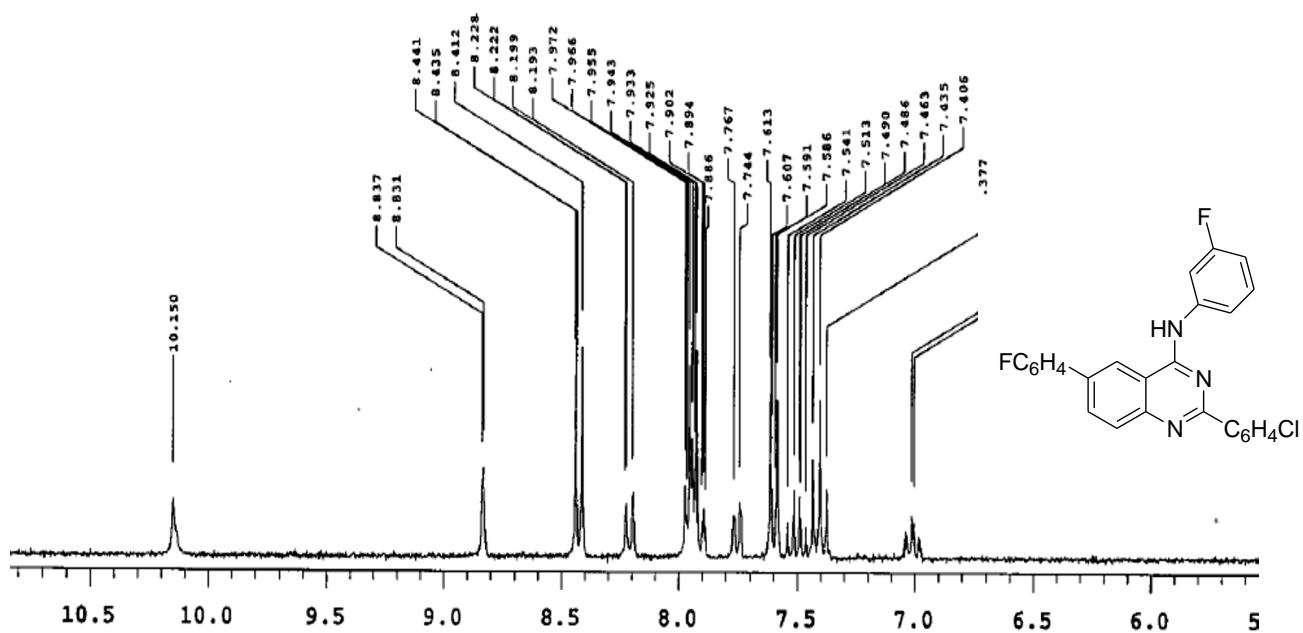

Figure 39. <sup>1</sup>H NMR spectrum of 4h in DMSO-*d*<sub>6</sub> at 500 MHz.

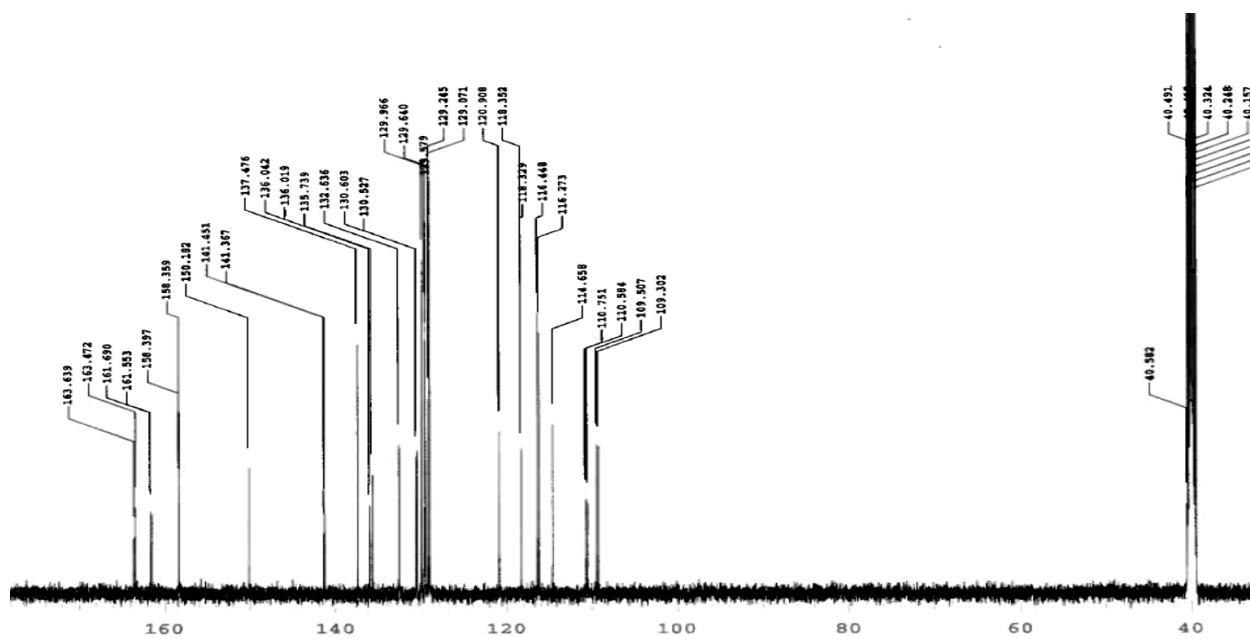

Figure 40. <sup>13</sup>C NMR spectrum of 4h in DMSO-*d*<sub>6</sub> at 125 MHz.

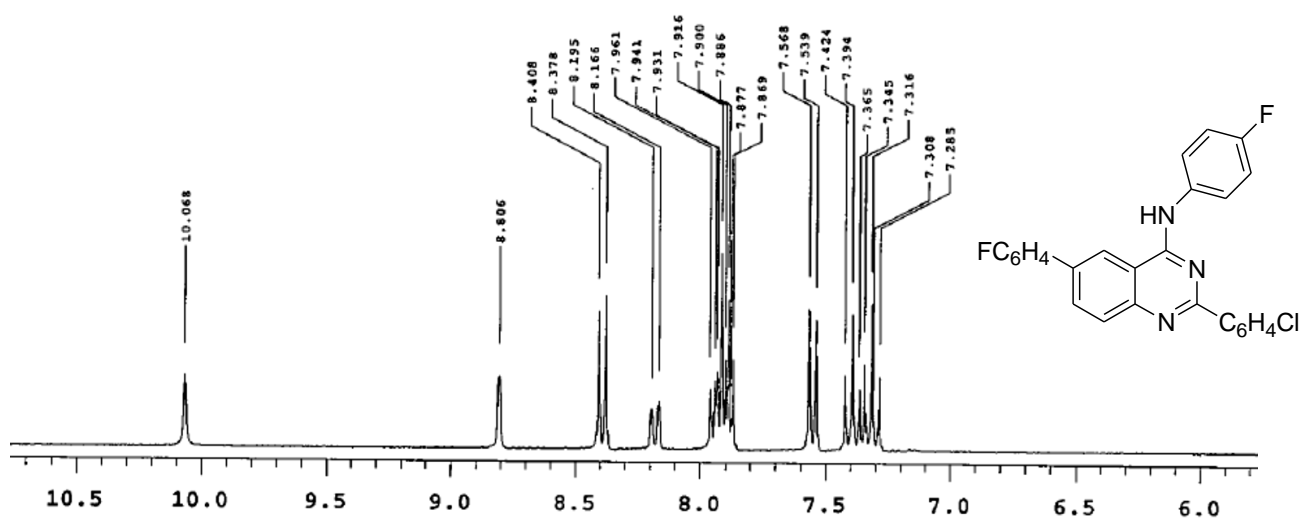

Figure 41.  $^1\text{H}$  NMR spectrum of 4i in  $\text{DMSO-}d_6$  at 500 MHz.

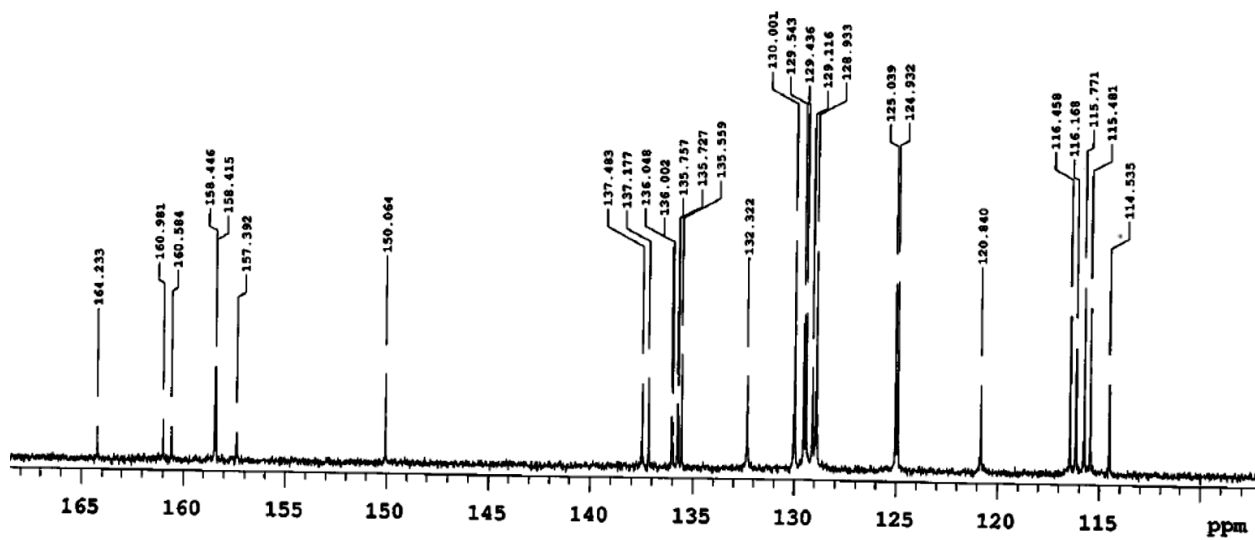

Figure 42.  $^{13}\text{C}$  NMR spectrum of 4i in  $\text{DMSO-}d_6$  at 125 MHz.

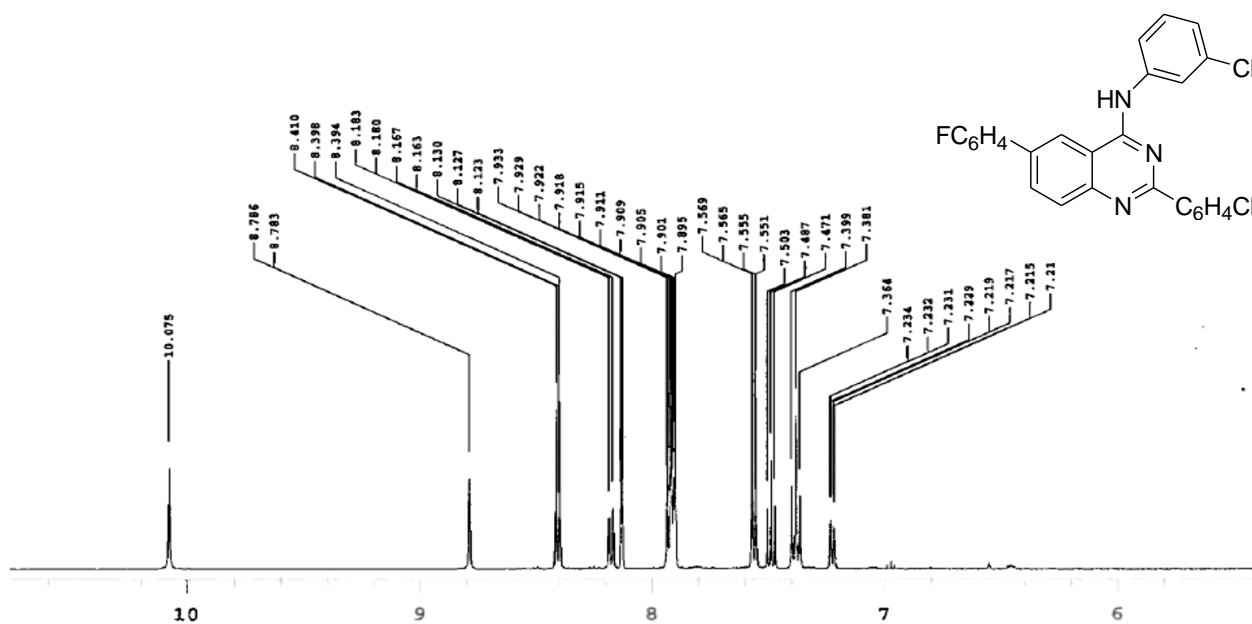

Figure 43. <sup>1</sup>H NMR spectrum of 4j in DMSO-*d*<sub>6</sub> at 500 MHz.

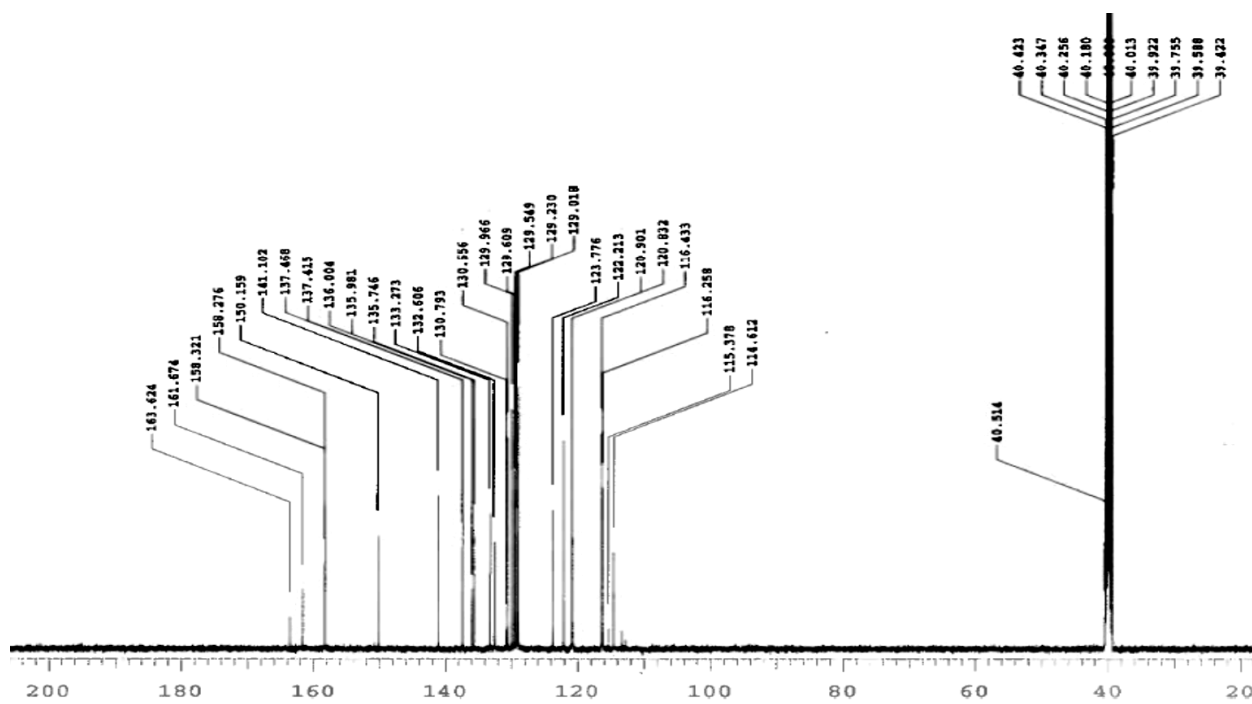

Figure 44. <sup>13</sup>C NMR spectrum of 4j in DMSO-*d*<sub>6</sub> at 125 MHz.

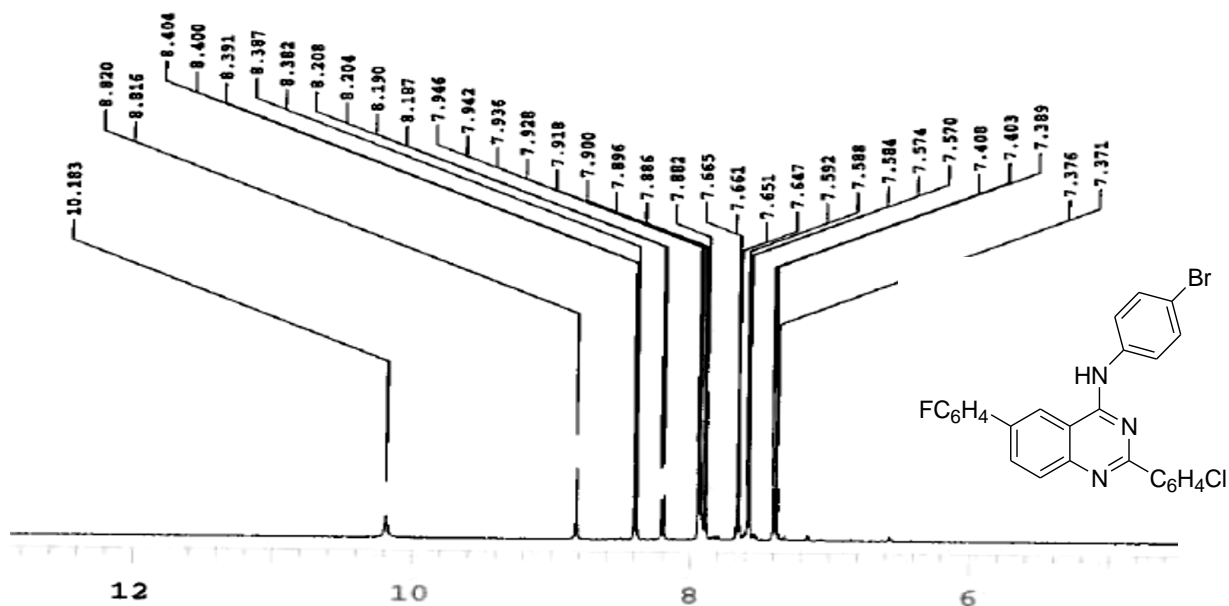

Figure 45.  $^1\text{H}$  NMR spectrum of 4k in  $\text{DMSO-}d_6$  at 500 MHz.

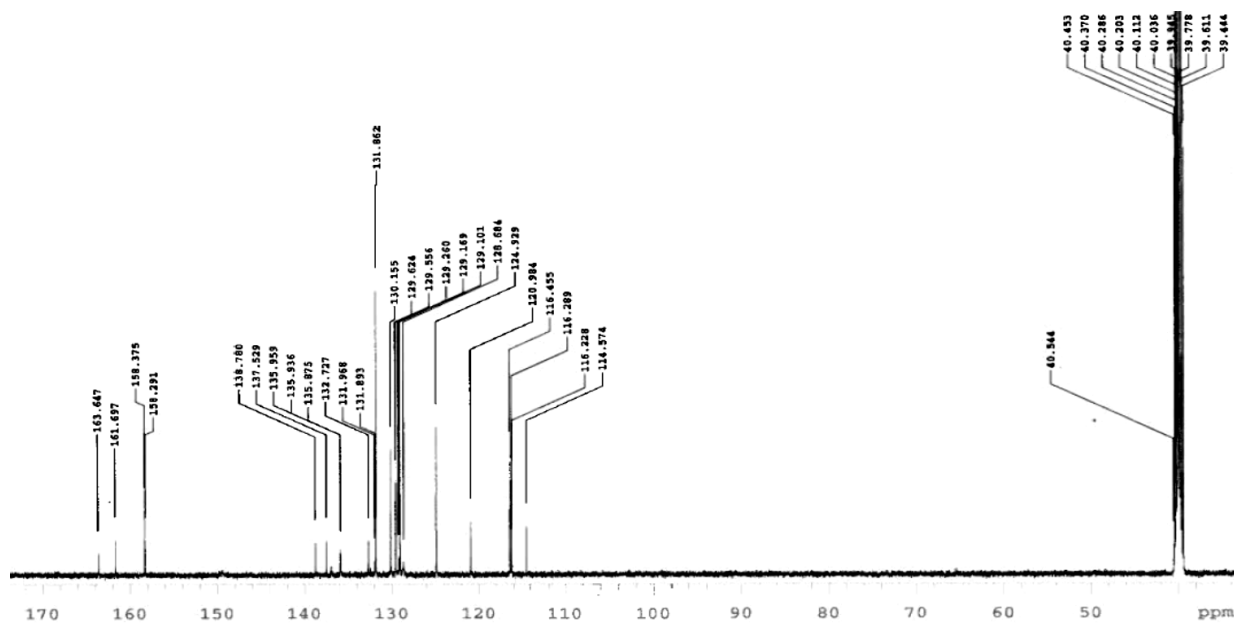

Figure 46.  $^{13}\text{C}$  NMR spectrum of 4k in  $\text{DMSO-}d_6$  at 125 MHz.

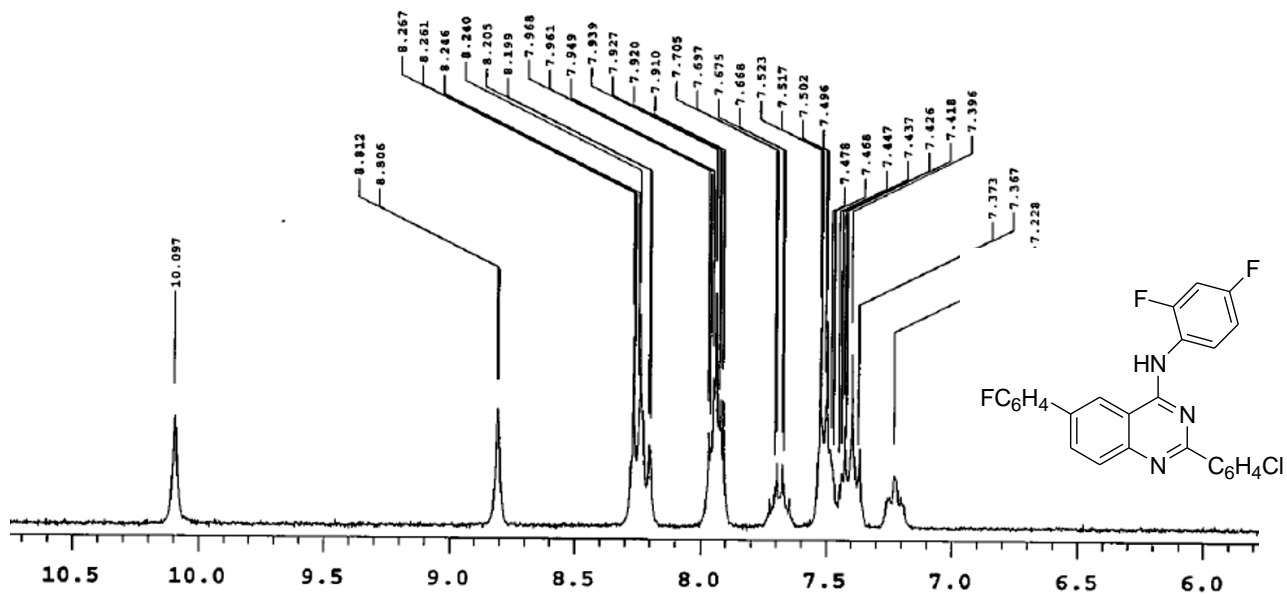

Figure 47.  $^1\text{H}$  NMR spectrum of 4l in  $\text{DMSO-}d_6$  at 500 MHz.

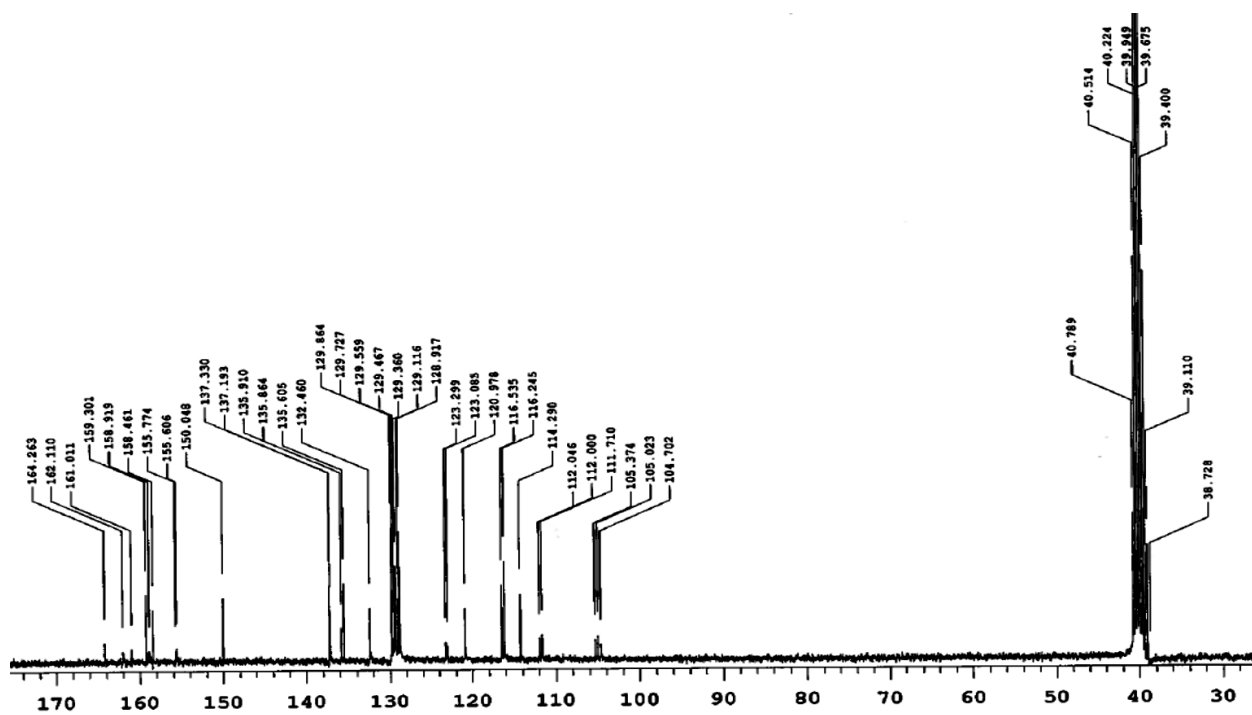

Figure 48.  $^{13}\text{C}$  NMR spectrum of 4l in  $\text{DMSO-}d_6$  at 125 MHz.



S2.

**% Cell Viability of HeLa and MCF-7 Cells Exposed to Gefitinib and Compounds 3a-l and 4a-l**

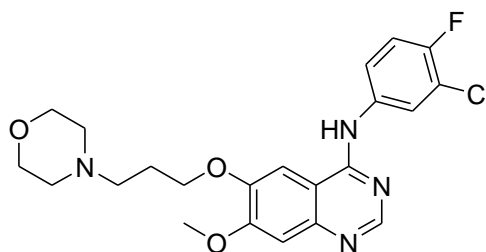

**Gefitinib**

**Table 1.** Percentage cell viability of HeLa and MCF-7 cells exposed to different concentrations of Gefitinib.

| Conc. ( $\mu\text{M}$ ) | %Viability HeLa | SD   | %Viability MCF-7 | SD   |
|-------------------------|-----------------|------|------------------|------|
| 100                     | 7.24            | 0.5  | 9.84             | 0.75 |
| 10                      | 53.75           | 1.47 | 42.26            | 1.92 |
| 1                       | 78.31           | 2.59 | 58.35            | 0.58 |
| 0.1                     | 89.57           | 1.55 | 62.15            | 0.88 |
| 0.01                    | 92.00           | 1.71 | 69.70            | 1.21 |
| 0.001                   | 99.00           | 0.92 | 72.03            | 1.83 |

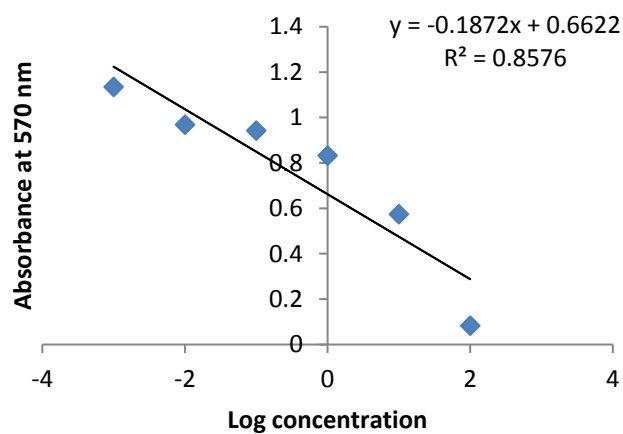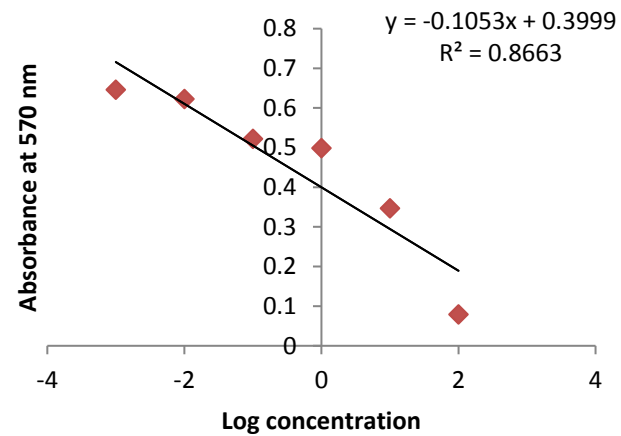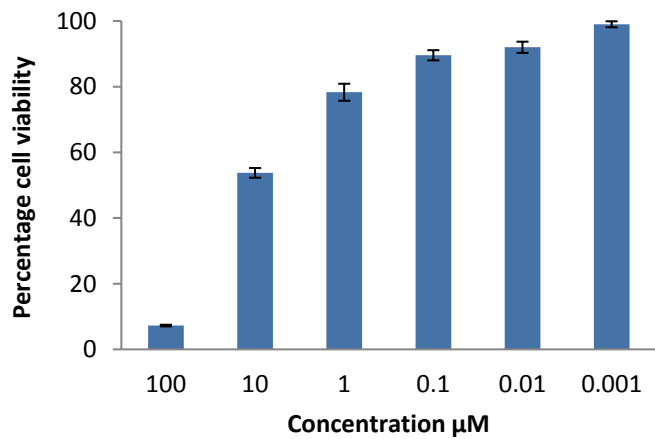

HeLa

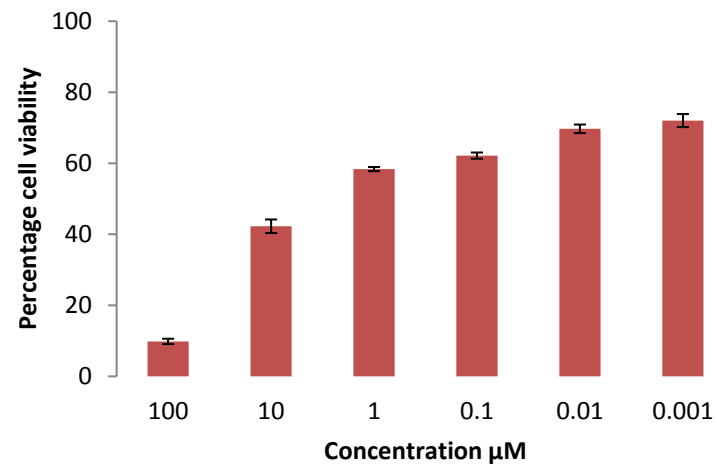

MCF-7

**Figure 49.** Linear regression plots and percentage cell viability graphs of HeLa and MCF-7 cells exposed to different concentrations of Getifinib.

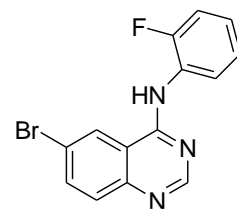

3a

**Table 2.** Percentage cell viability of HeLa and MCF-7 cells exposed to different concentrations of 3a.

| Conc. ( $\mu\text{M}$ ) | %Viability HeLa | SD   | %Viability MCF-7 | SD   |
|-------------------------|-----------------|------|------------------|------|
| 100                     | 7.26            | 0.41 | 12.82            | 0.04 |
| 10                      | 72.36           | 0.28 | 48.54            | 0.05 |
| 1                       | 75.85           | 0.66 | 55.84            | 3.13 |
| 0.1                     | 78.48           | 1.86 | 63.77            | 1.75 |

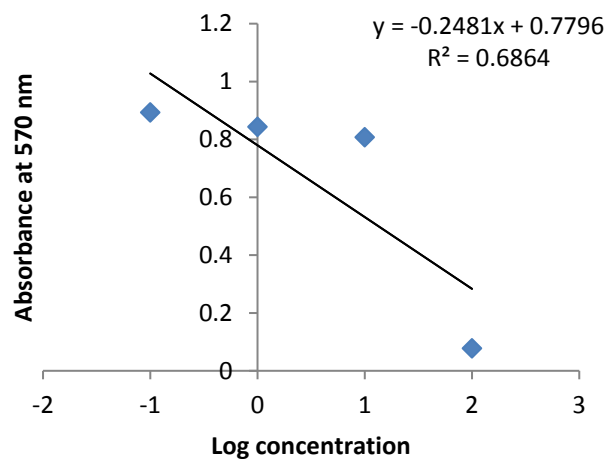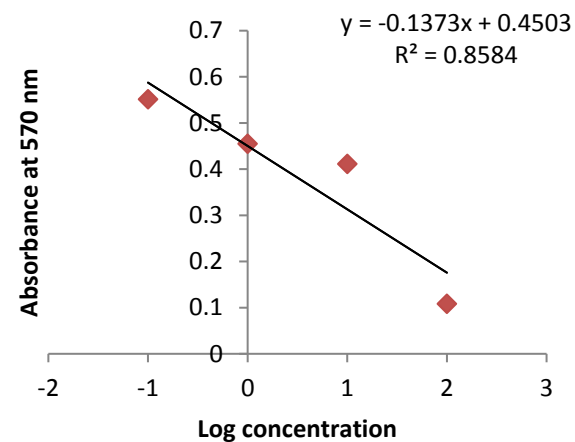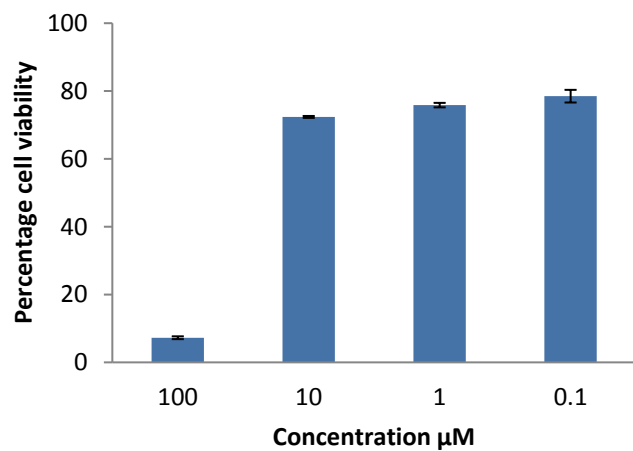

HeLa

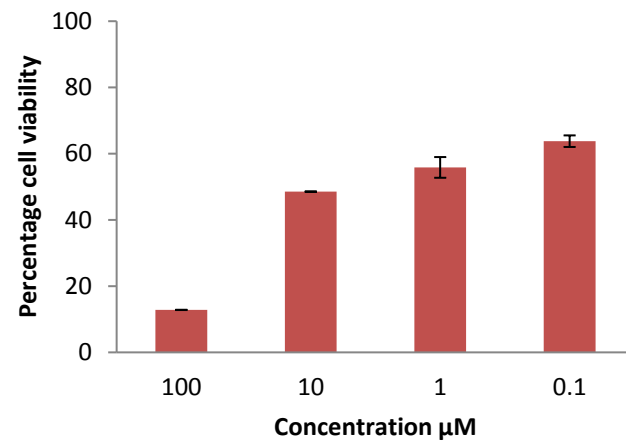

MCF-7

**Figure 50.** Linear regression plots and percentage cell viability graphs of HeLa and MCF-7 cells exposed to different concentrations of **3a**.

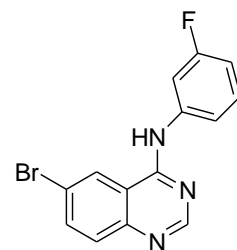

**3b**

**Table 3.** Percentage cell viability of HeLa and MCF-7 cells exposed to different concentrations of **3b**.

| Conc. ( $\mu\text{M}$ ) | %Viability HeLa | SD   | %Viability MCF-7 | SD   |
|-------------------------|-----------------|------|------------------|------|
| 100                     | 7.46            | 0.25 | 11.08            | 0.25 |
| 10                      | 61.82           | 1.29 | 53.49            | 0.21 |
| 1                       | 66.08           | 0.82 | 62.36            | 1.99 |
| 0.1                     | 72.16           | 1.04 | 67.63            | 2.54 |

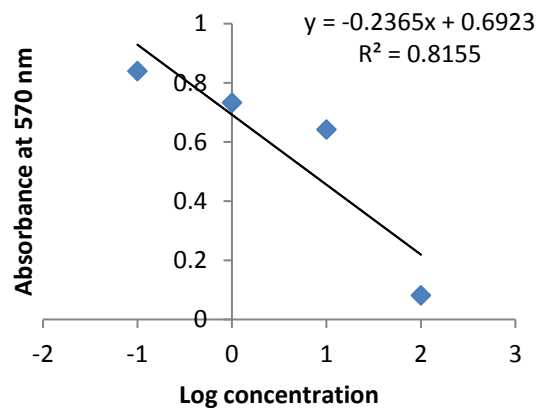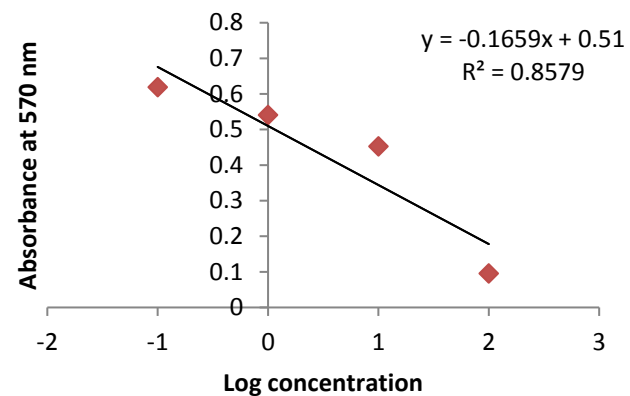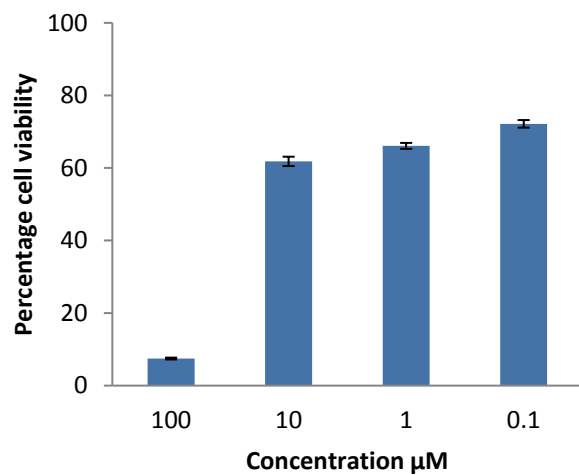

HeLa

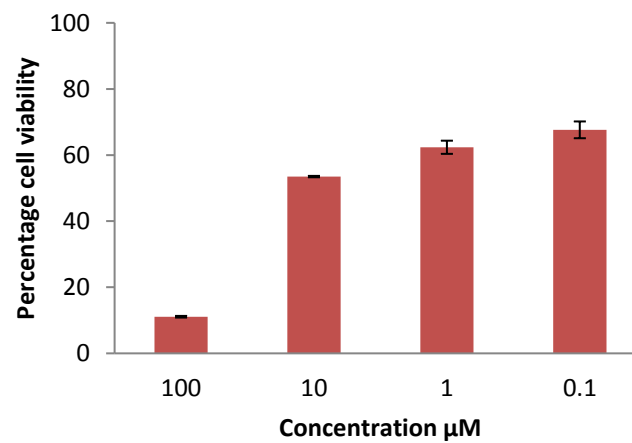

MCF-7

**Figure 51.** Linear regression plots and percentage cell viability graphs of HeLa and MCF-7 cells exposed to different concentrations of **3b**.

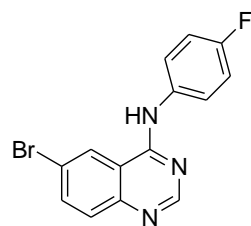

**3c**

**Table 4.** Percentage cell viability of HeLa and MCF-7 cells exposed to different concentrations of **3c**.

| Conc. ( $\mu\text{M}$ ) | %Viability HeLa | SD   | %Viability MCF-7 | SD   |
|-------------------------|-----------------|------|------------------|------|
| 100                     | 8.60            | 0.47 | 15.82            | 1.04 |
| 10                      | 48.10           | 2.37 | 41.23            | 0.80 |
| 1                       | 67.81           | 0.32 | 66.57            | 1.12 |
| 0.1                     | 76.50           | 2.18 | 80.27            | 2.74 |

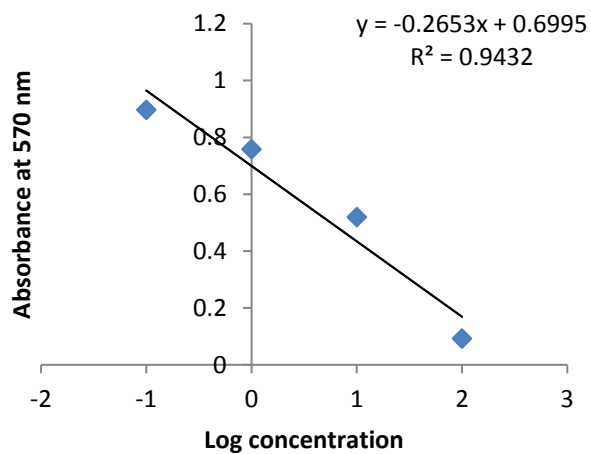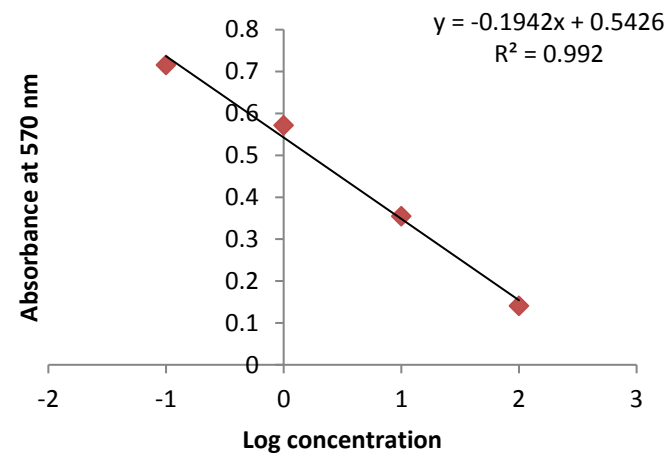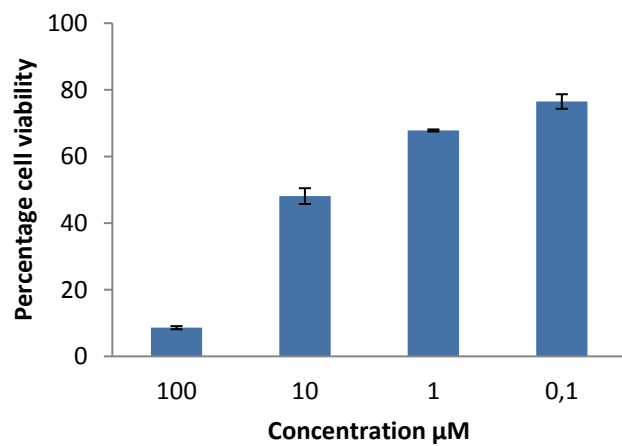

HeLa

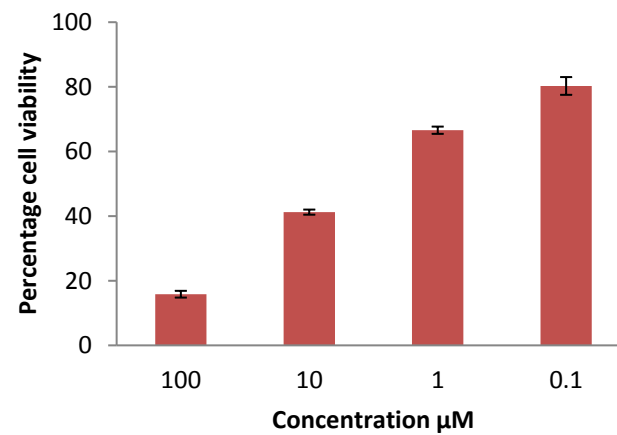

MCF-7

**Figure 52.** Linear regression plots and percentage cell viability graphs of HeLa and MCF-7 cells exposed to different concentrations of **3c**.



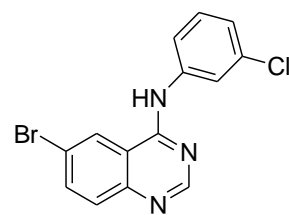

**3d**

**Table 5.** Percentage cell viability of HeLa and MCF-7 cells exposed to different concentrations of **3d**.

| Conc. ( $\mu\text{M}$ ) | %Viability HeLa | SD   | %Viability MCF-7 | SD   |
|-------------------------|-----------------|------|------------------|------|
| 100                     | 7.60            | 0.63 | 14.03            | 0.50 |
| 10                      | 56.88           | 1.58 | 58.26            | 2.12 |
| 1                       | 81.79           | 1.76 | 64.74            | 2.90 |
| 0.1                     | 92.05           | 0.69 | 72.32            | 2.91 |

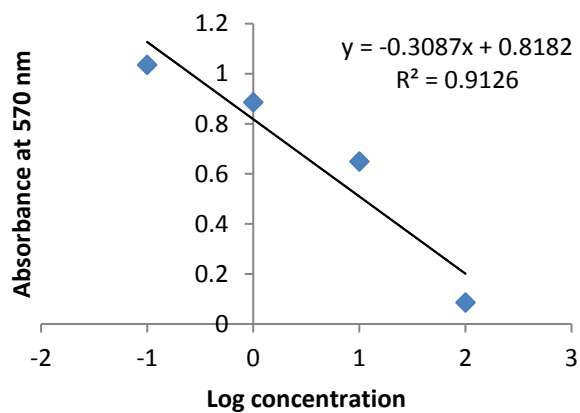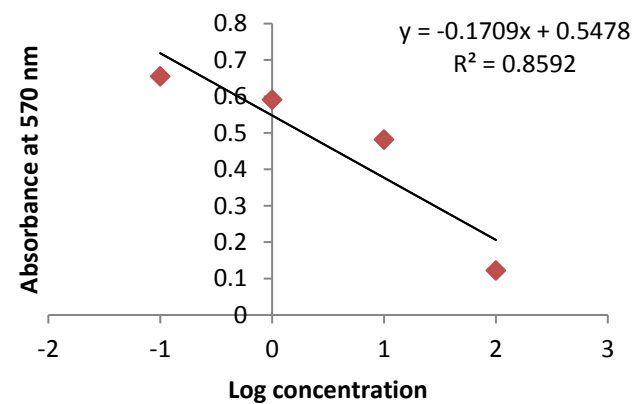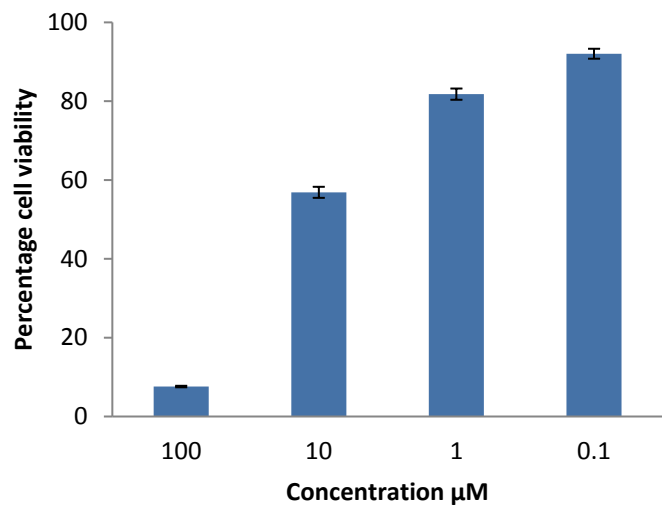

HeLa

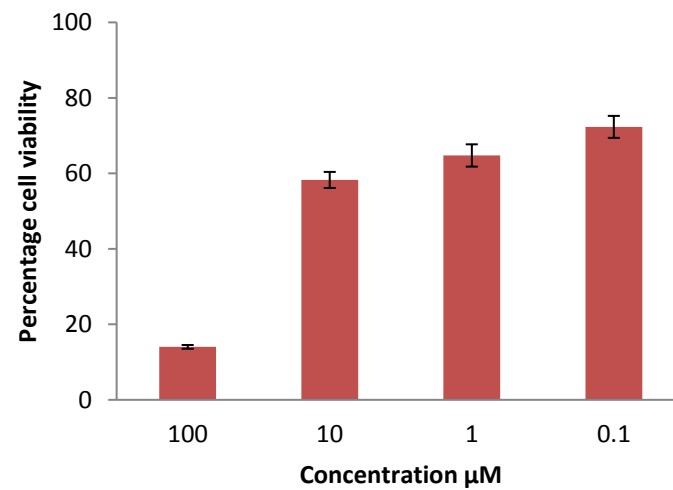

MCF-7

**Figure 53.** Linear regression plots and percentage cell viability graphs of HeLa and MCF-7 cells exposed to different concentrations of **3d**.

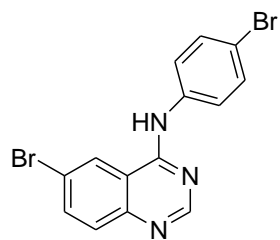

**3e**

**Table 6.** Percentage cell viability of HeLa and MCF-7 cells exposed to different concentrations of **3e**.

| Conc. ( $\mu\text{g/ml}$ ) | %Viability HeLa | SD   | %Viability MCF-7 | SD   |
|----------------------------|-----------------|------|------------------|------|
| 100                        | 7.06            | 0.20 | 11.20            | 0.33 |
| 10                         | 67.54           | 1.40 | 55.17            | 2.17 |
| 1                          | 94.28           | 1.42 | 84.78            | 1.70 |
| 0.1                        | 97.41           | 1.26 | 99.22            | 1.11 |

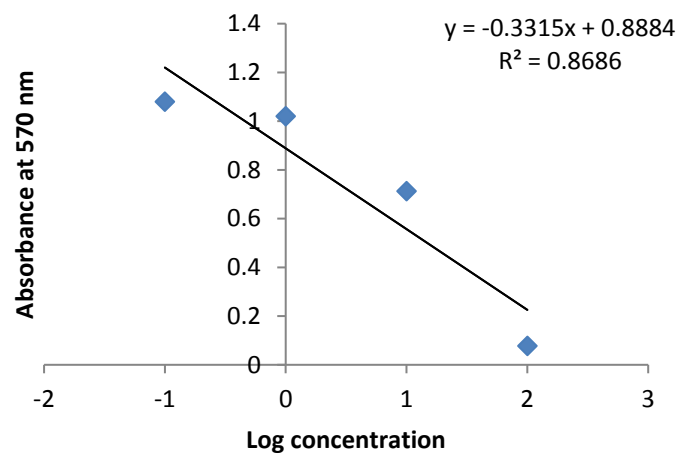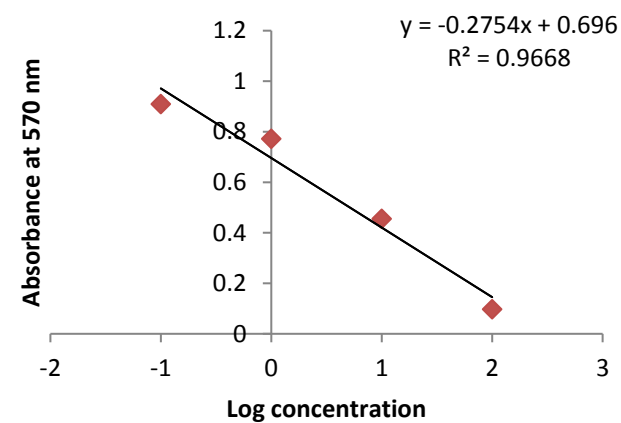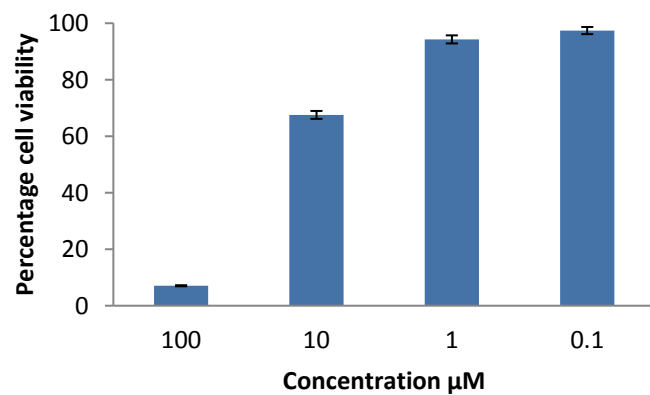

HeLa

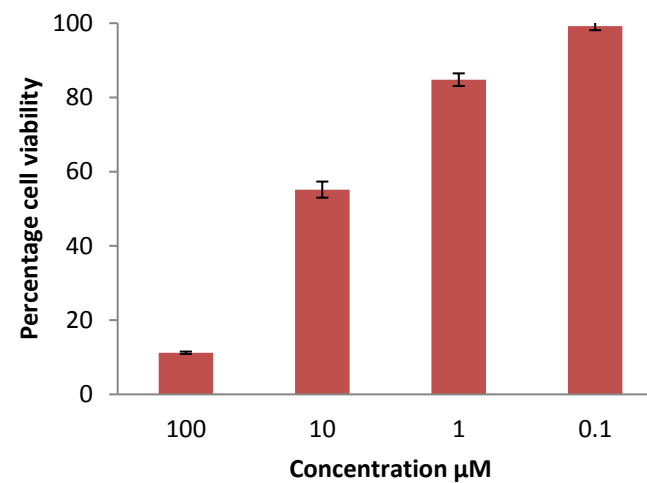

MCF-7

**Figure 54.** Linear regression plots and percentage cell viability graphs of HeLa and MCF-7 cells exposed to different concentrations of **3e**.

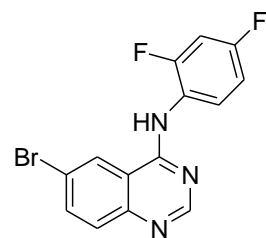

**3f**

**Table 7.** Percentage cell viability of HeLa and MCF-7 cells exposed to different concentrations of **3f**.

| Conc. ( $\mu\text{M}$ ) | %Viability HeLa | SD   | %Viability MCF-7 | SD   |
|-------------------------|-----------------|------|------------------|------|
| 100                     | 7.91            | 0.60 | 11.35            | 0.04 |
| 10                      | 65.86           | 0.38 | 43.62            | 0.02 |
| 1                       | 68.61           | 1.24 | 55.96            | 1.63 |
| 0.1                     | 79.91           | 2.35 | 66.57            | 0.21 |

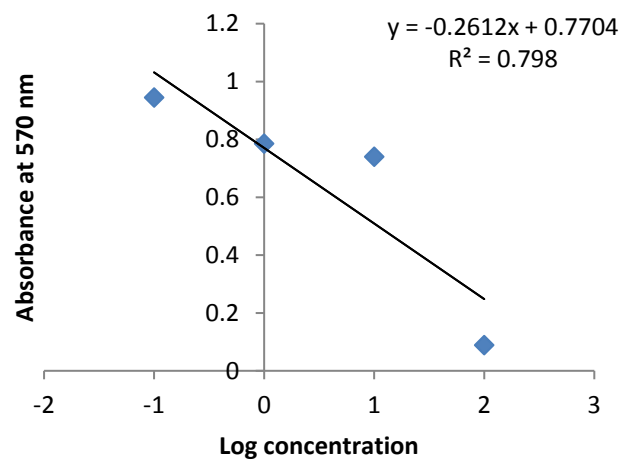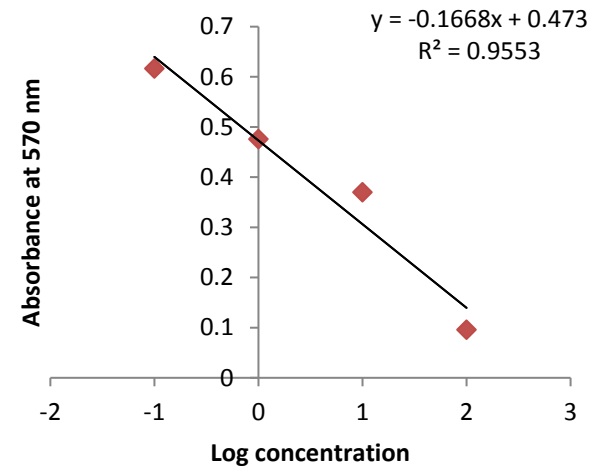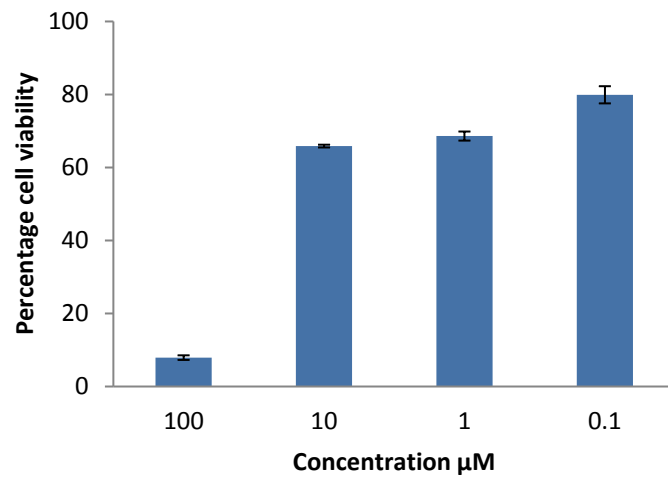

HeLa

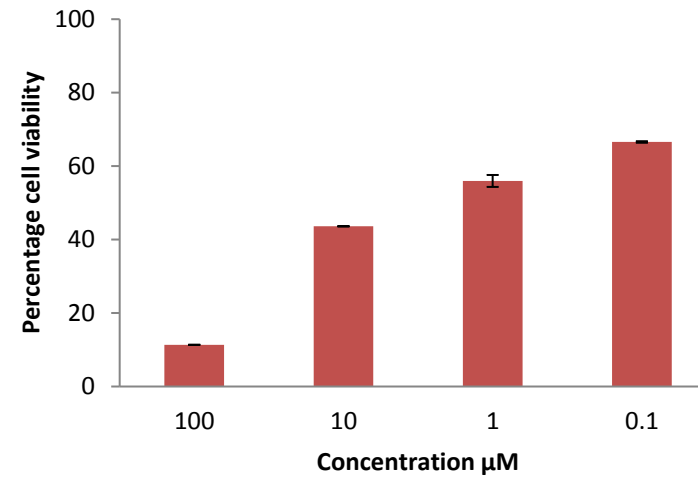

MCF-7

**Figure 55.** Linear regression plots and percentage cell viability graphs of HeLa and MCF-7 cells exposed to different concentrations of **3f**.

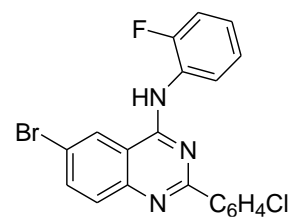

**3g**

**Table 8.** Percentage cell viability of HeLa and MCF-7 cells exposed to different concentrations of **3g**.

| Conc. ( $\mu\text{M}$ ) | %Viability HeLa | SD   | %Viability MCF-7 | SD   |
|-------------------------|-----------------|------|------------------|------|
| 100                     | 10.84           | 1.49 | 13.57            | 0.11 |
| 10                      | 33.76           | 1.94 | 35.28            | 0.71 |
| 1                       | 49.46           | 1.58 | 38.66            | 3.67 |
| 0.1                     | 58.50           | 1.45 | 50.57            | 1.08 |

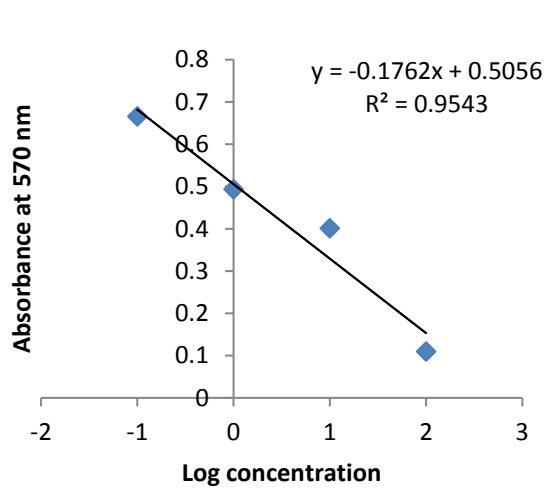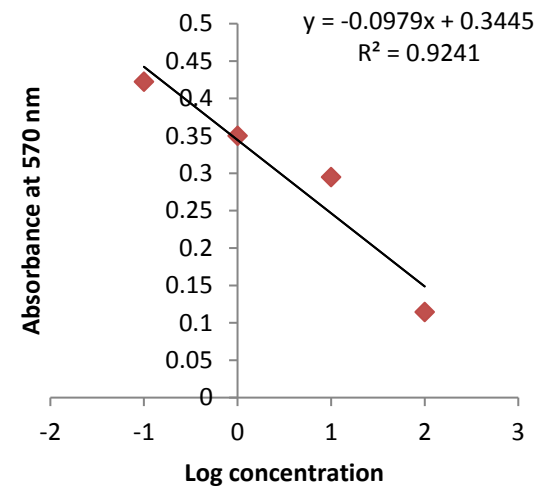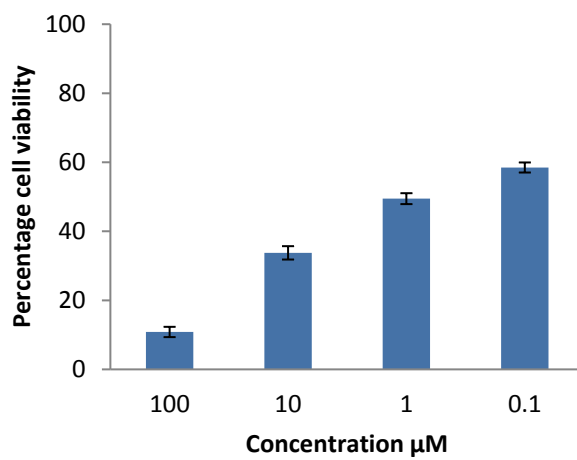

HeLa

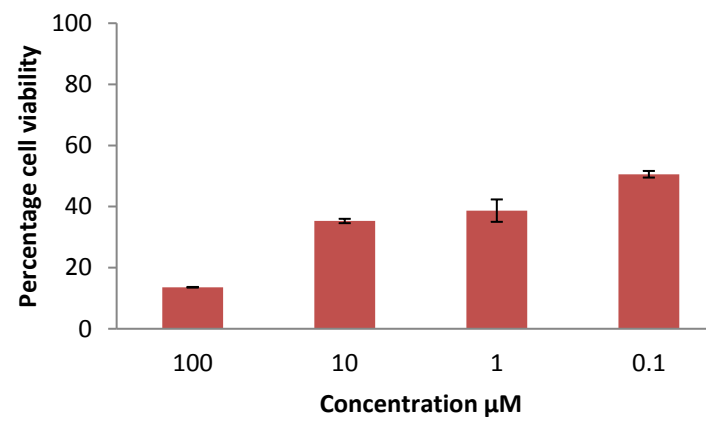

MCF-7

**Figure 56.** Linear regression plots and percentage cell viability graphs of HeLa and MCF-7 cells exposed to different concentrations of **3g**.



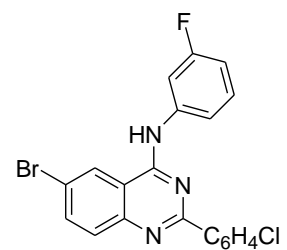

**3h**

**Table 9.** Percentage cell viability of HeLa and MCF-7 cells exposed to different concentrations of **3h**.

| Conc. ( $\mu\text{M}$ ) | %Viability HeLa | SD   | %Viability MCF-7 | SD   |
|-------------------------|-----------------|------|------------------|------|
| 100                     | 11.33           | 0.16 | 17.74            | 0.08 |
| 10                      | 31.05           | 1.55 | 31.92            | 1.62 |
| 1                       | 55.12           | 1.84 | 46.24            | 2.63 |
| 0.1                     | 73.86           | 1.18 | 63.10            | 0.63 |

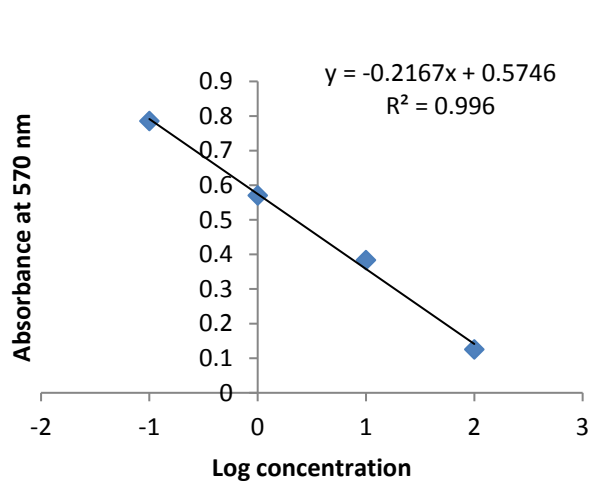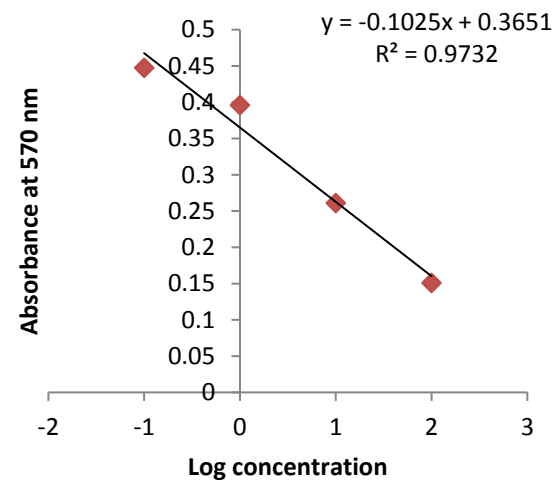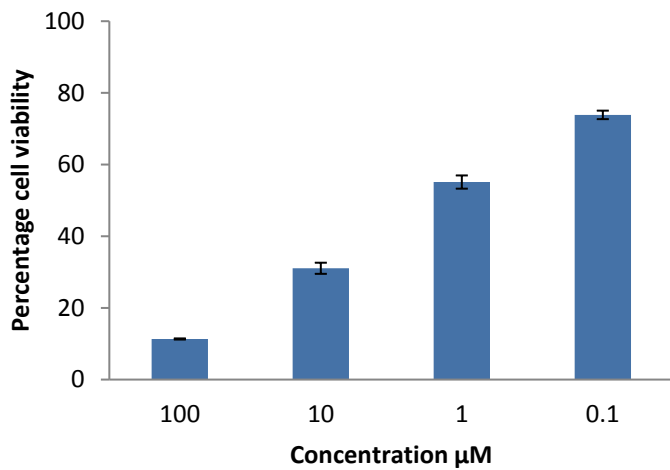

HeLa

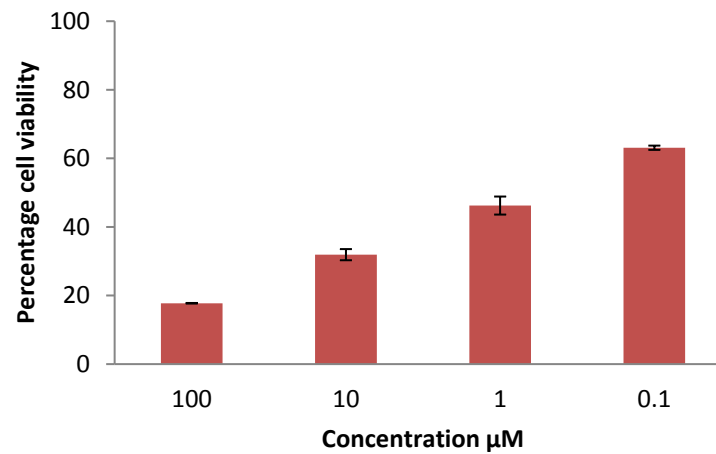

MCF-7

**Figure 57.** Linear regression plots and percentage cell viability graphs of HeLa and MCF-7 cells exposed to different concentrations of **3h**.

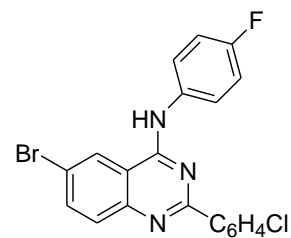

3i

**Table 10.** Percentage cell viability of HeLa and MCF-7 cells exposed to different concentrations of 3i.

| Conc. ( $\mu\text{M}$ ) | %Viability HeLa | SD   | %Viability MCF-7 | SD   |
|-------------------------|-----------------|------|------------------|------|
| 100                     | 11.51           | 0.95 | 12.55            | 3.00 |
| 10                      | 39.36           | 1.71 | 33.63            | 3.96 |
| 1                       | 81.30           | 1.56 | 50.31            | 3.30 |
| 0.1                     | 89.61           | 1.03 | 68.52            | 1.63 |

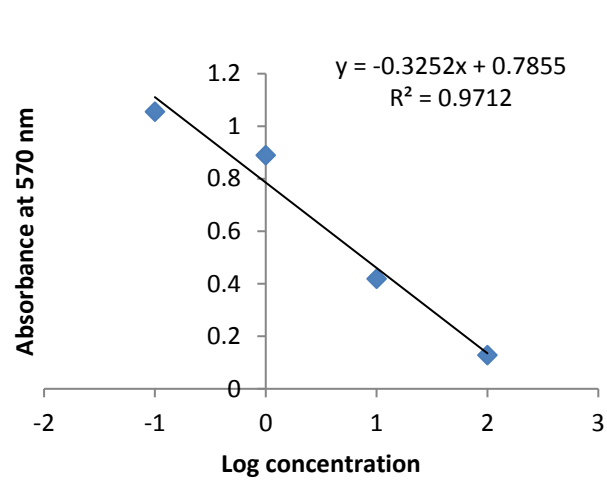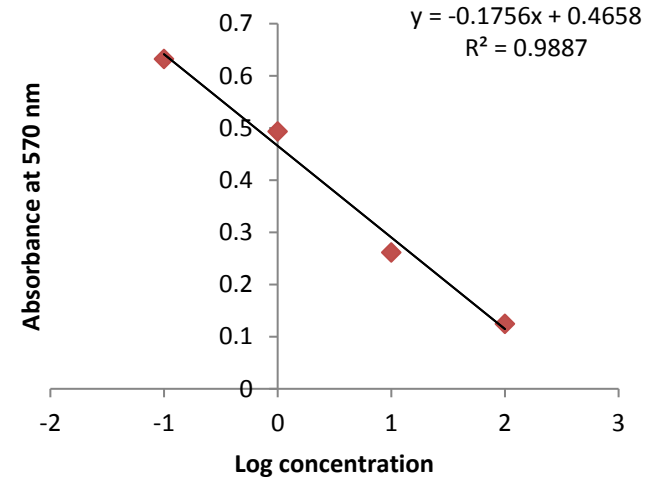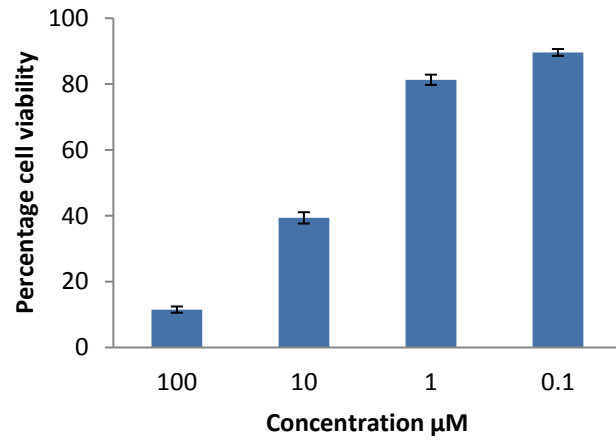

HeLa

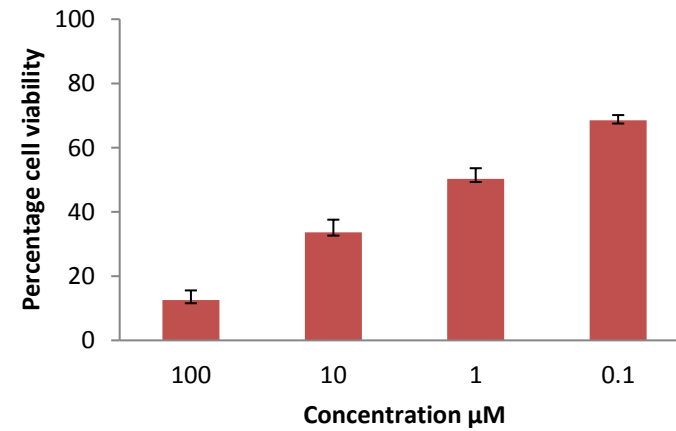

MCF-7

**Figure 58.** Linear regression plots and percentage cell viability graphs of HeLa and MCF-7 cells exposed to different concentrations of **3i**.

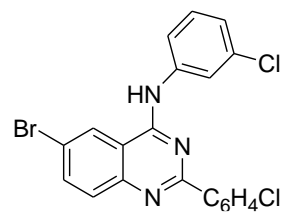

**3j**

**Table 11.** Percentage cell viability of HeLa and MCF-7 cells exposed to different concentrations of **3j**.

| Conc. ( $\mu\text{M}$ ) | %Viability HeLa | SD   | %Viability MCF-7 | SD   |
|-------------------------|-----------------|------|------------------|------|
| 100                     | 8.82            | 0.10 | 12.52            | 3.46 |
| 10                      | 33.02           | 0.50 | 33.69            | 3.13 |
| 1                       | 59.67           | 1.94 | 50.34            | 2.09 |
| 0.1                     | 92.18           | 2.86 | 69.79            | 2.25 |

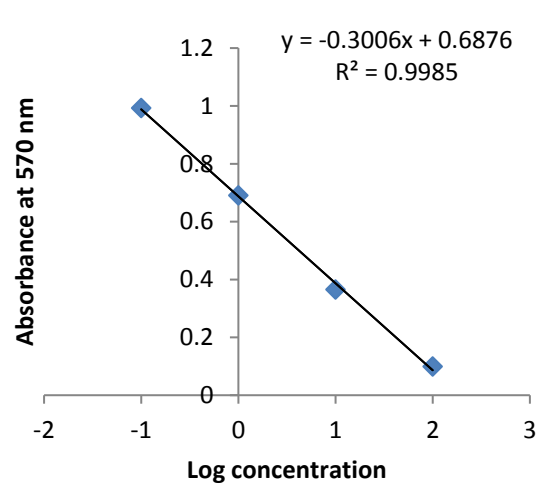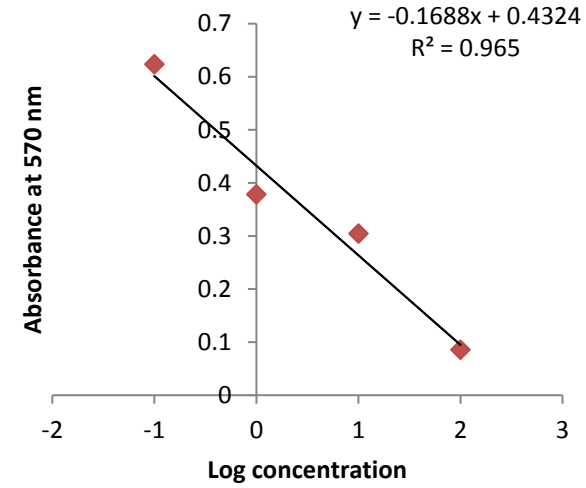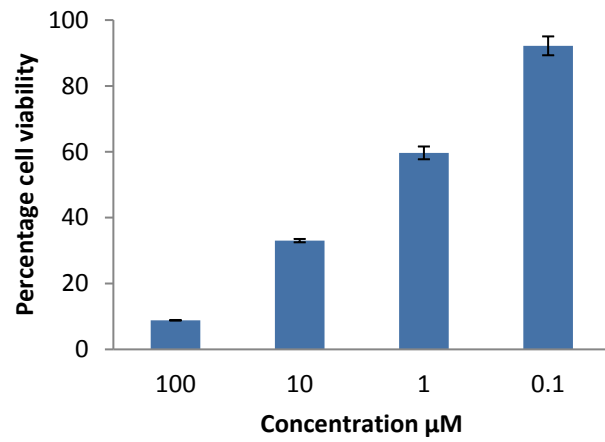

HeLa

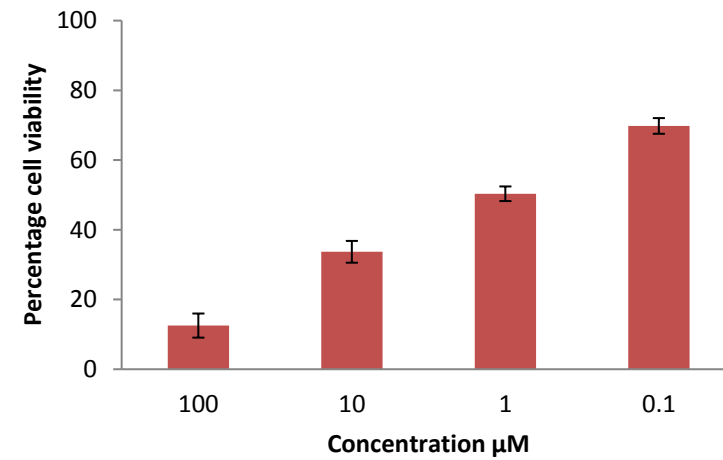

MCF-7

**Figure 59.** Linear regression plots and percentage cell viability graphs of HeLa and MCF-7 cells exposed to different concentrations of **3j**.

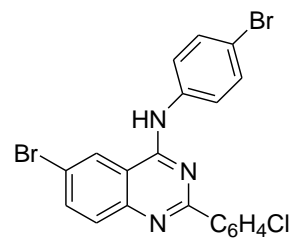

**3k**

**Table 12.** Percentage cell viability of HeLa and MCF-7 cells exposed to different concentrations of **3k**.

| Conc. ( $\mu\text{M}$ ) | %Viability HeLa | SD   | %Viability MCF-7 | SD   |
|-------------------------|-----------------|------|------------------|------|
| 100                     | 7.59            | 0.12 | 9.17             | 0.04 |
| 10                      | 41.22           | 1.13 | 38.70            | 1.88 |
| 1                       | 76.45           | 1.62 | 63.54            | 3.00 |
| 0.1                     | 82.28           | 1.17 | 72.17            | 3.54 |

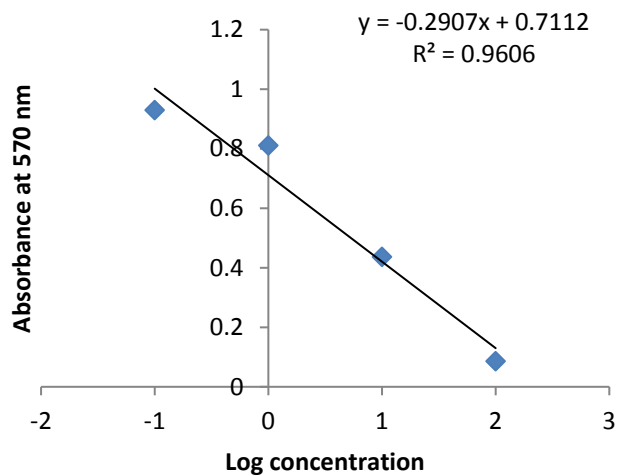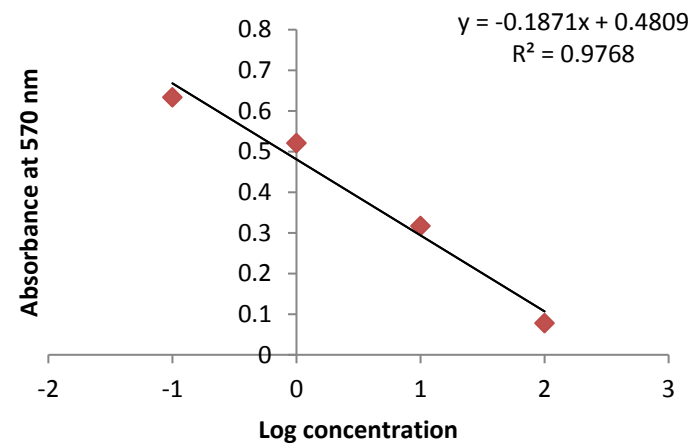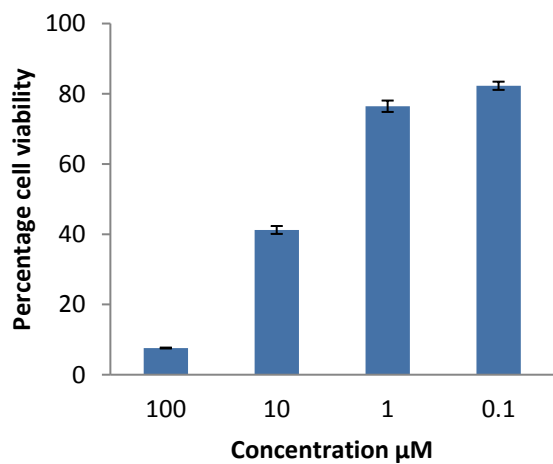

HeLa

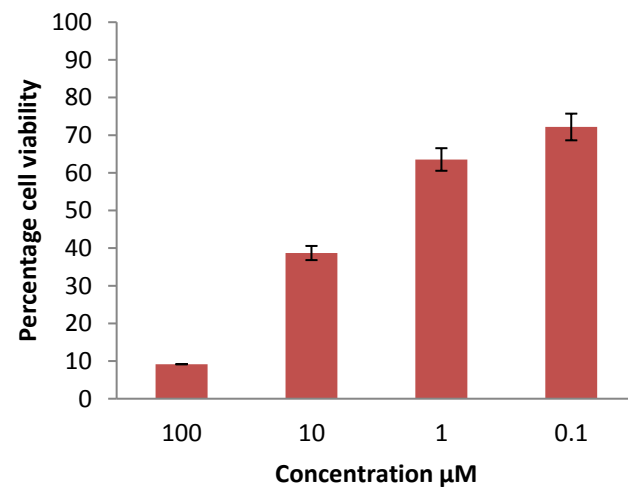

MCF-7

**Figure 60.** Linear regression plots and percentage cell viability graphs of HeLa and MCF-7 cells exposed to different concentrations of **3k**.



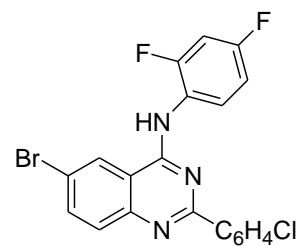

31

**Table 13.** Percentage cell viability of HeLa and MCF-7 cells exposed to different concentrations of 31.

| Conc. ( $\mu\text{M}$ ) | %Viability HeLa | SD   | %Viability MCF-7 | SD   |
|-------------------------|-----------------|------|------------------|------|
| 100                     | 10.99           | 0.25 | 16.71            | 0.54 |
| 10                      | 31.19           | 0.30 | 39.93            | 0.79 |
| 1                       | 38.36           | 0.54 | 44.20            | 1.00 |
| 0.1                     | 53.28           | 0.80 | 47.24            | 1.38 |

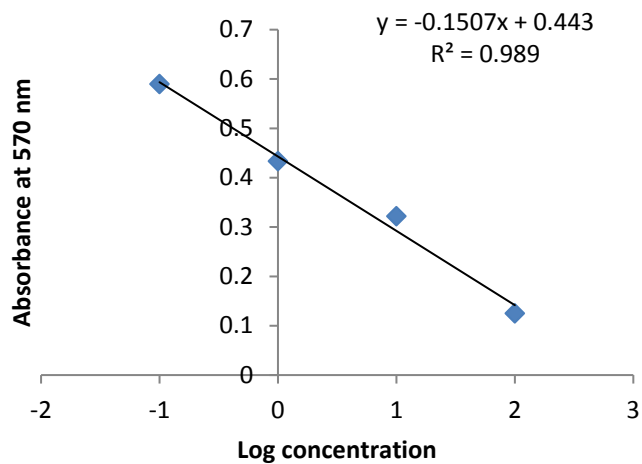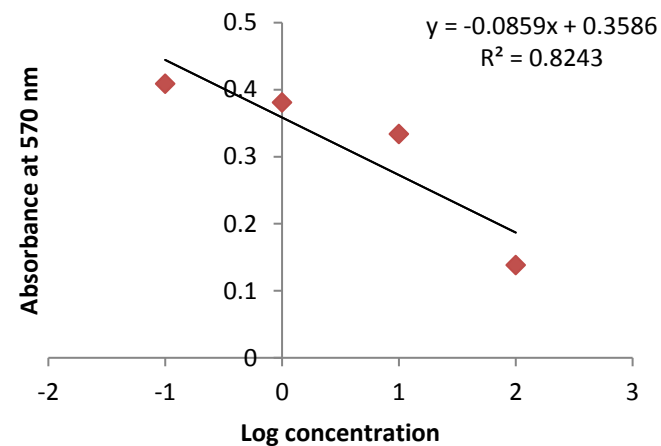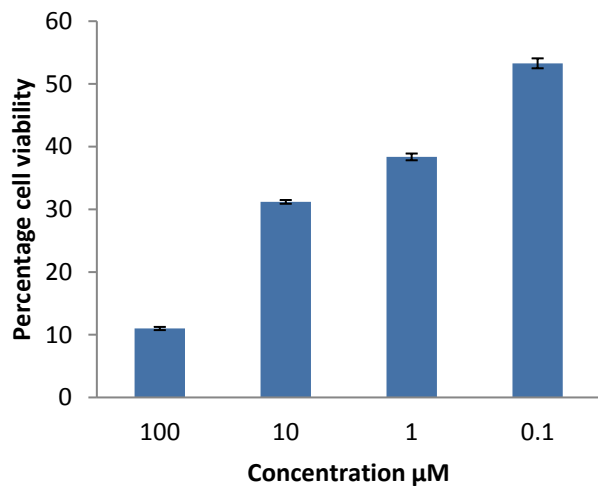

HeLa

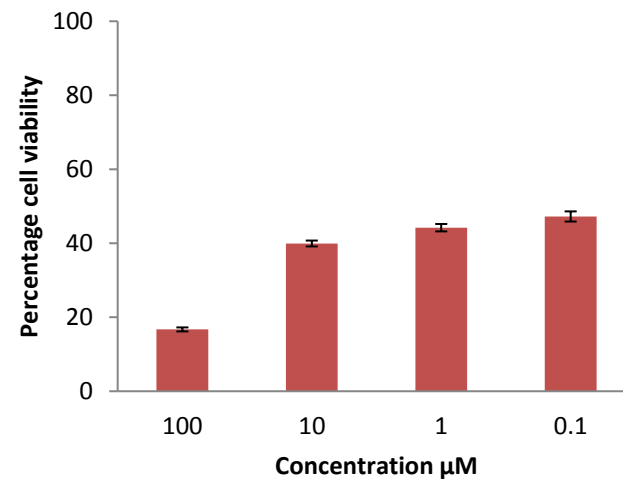

MCF-7

**Figure 61.** Linear regression plots and percentage cell viability graphs of HeLa and MCF-7 cells exposed to different concentrations of **31**.

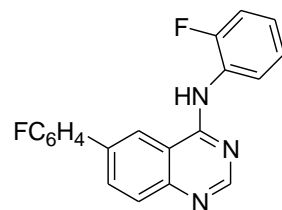

**4a**

**Table 14.** Percentage cell viability of HeLa and MCF-7 cells exposed to different concentrations of **4a**.

| Conc. (μM) | %Viability HeLa | SD   | %Viability MCF-7 | SD   |
|------------|-----------------|------|------------------|------|
| 100        | 9.34            | 0.50 | 15.59            | 0.13 |
| 10         | 52.17           | 0.54 | 54.34            | 2.34 |
| 1          | 60.79           | 1.64 | 55.02            | 2.04 |
| 0.1        | 64.14           | 0.60 | 57.53            | 2.92 |

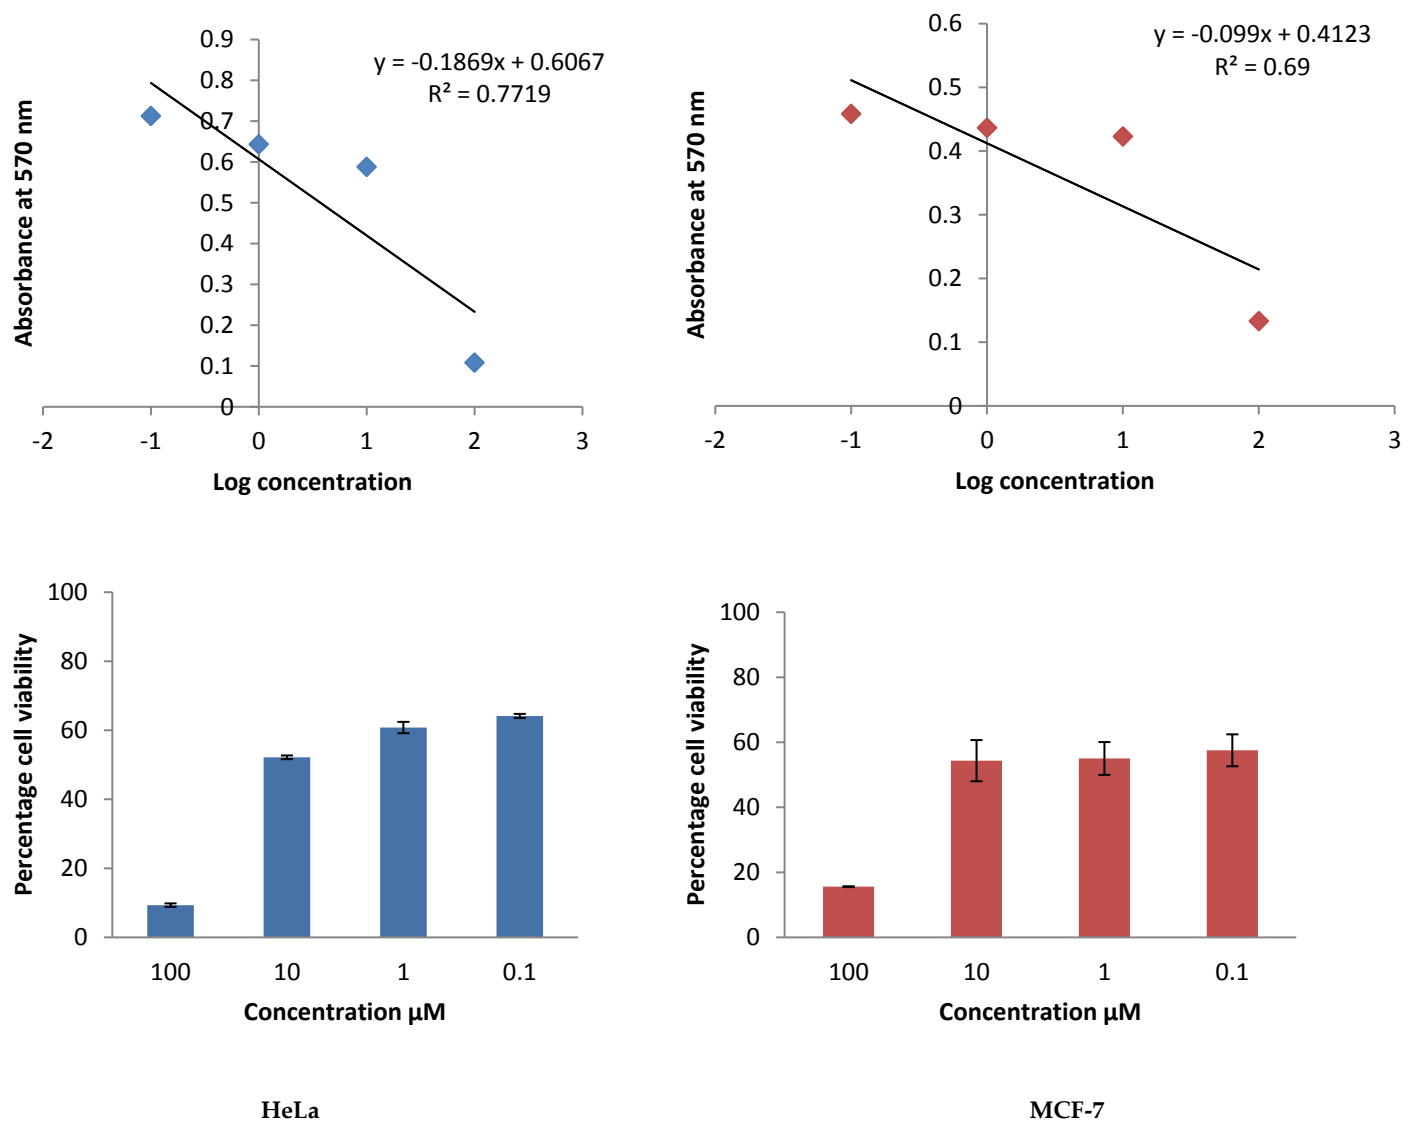

**Figure 62.** Linear regression plots and percentage cell viability graphs of HeLa and MCF-7 cells exposed to different concentrations of **4a**.

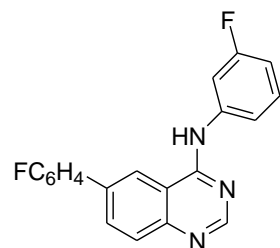

**4b**

**Table 15.** Percentage cell viability of HeLa and MCF-7 cells exposed to different concentrations of **4b**.

| Conc. ( $\mu\text{M}$ ) | %Viability HeLa | SD   | %Viability MCF-7 | SD   |
|-------------------------|-----------------|------|------------------|------|
| 100                     | 10.30           | 0.66 | 16.92            | 0.08 |
| 10                      | 42.16           | 1.23 | 43.47            | 2.29 |
| 1                       | 55.14           | 1.55 | 51.98            | 2.71 |
| 0.1                     | 63.85           | 2.59 | 56.67            | 2.76 |

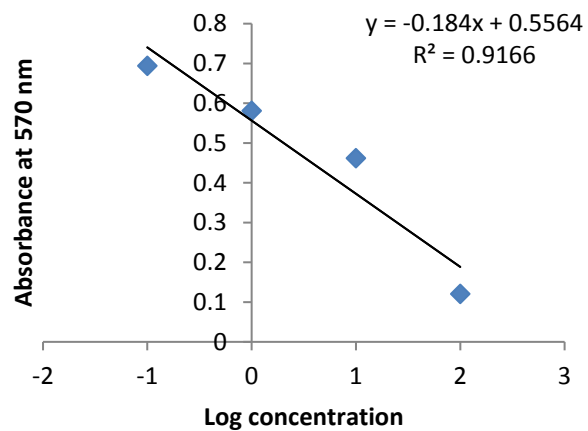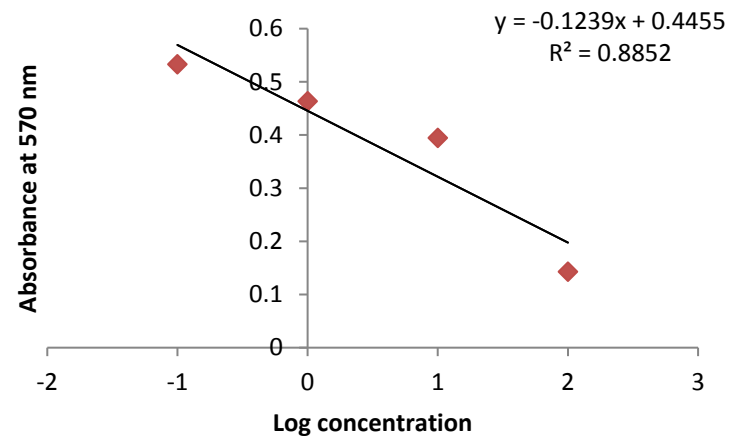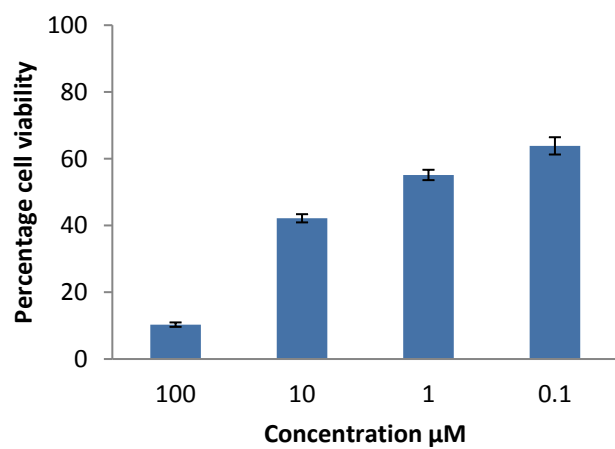

HeLa

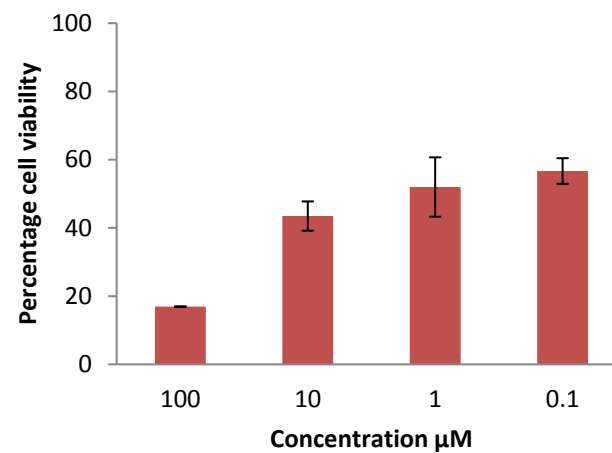

MCF-7

**Figure 63.** Linear regression plots and percentage cell viability graphs of HeLa and MCF-7 cells exposed to different concentrations of **4b**.

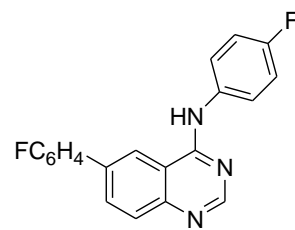

**4c**

**Table 16.** Percentage cell viability of HeLa and MCF-7 cells exposed to different concentrations of **4c**.

| Conc. ( $\mu\text{M}$ ) | %Viability HeLa | SD   | %Viability MCF-7 | SD   |
|-------------------------|-----------------|------|------------------|------|
| 100                     | 9.81            | 0.47 | 15.86            | 1.25 |
| 10                      | 31.19           | 1.20 | 45.50            | 3.25 |
| 1                       | 57.44           | 1.10 | 65.27            | 2.13 |
| 0.1                     | 57.28           | 1.61 | 66.69            | 2.79 |

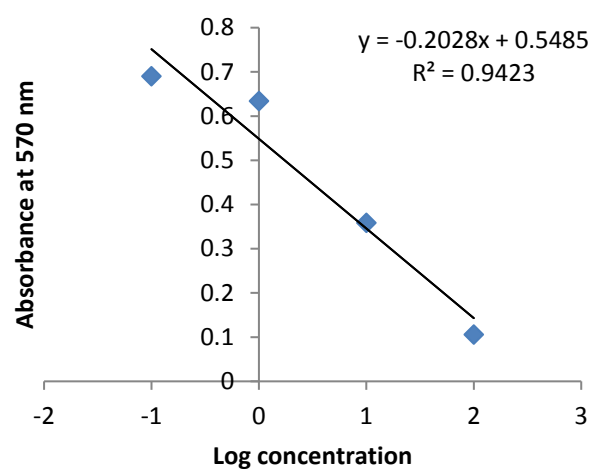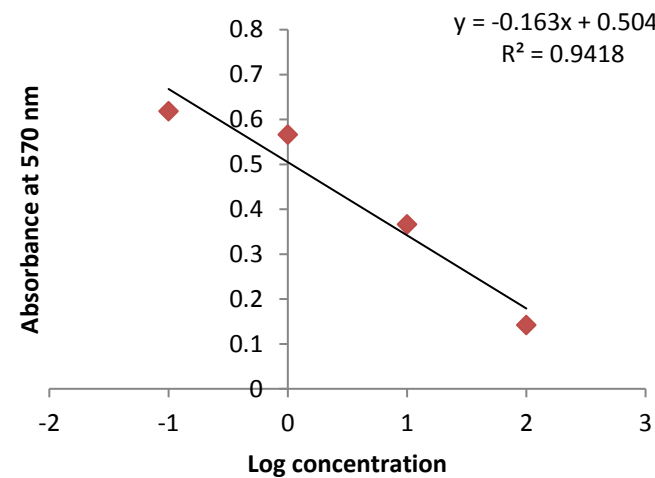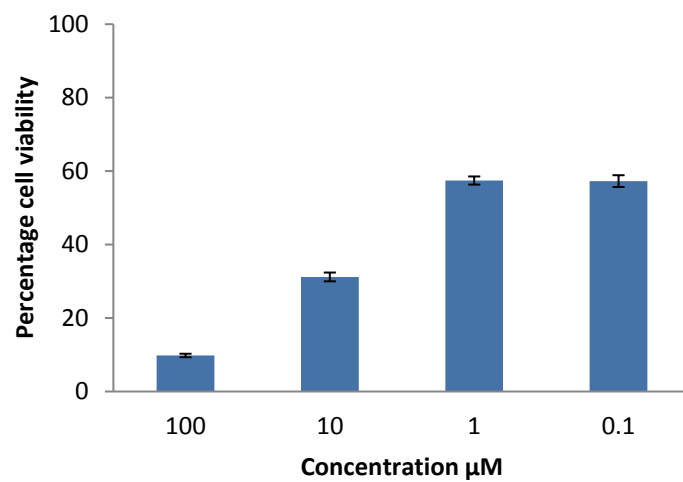

HeLa

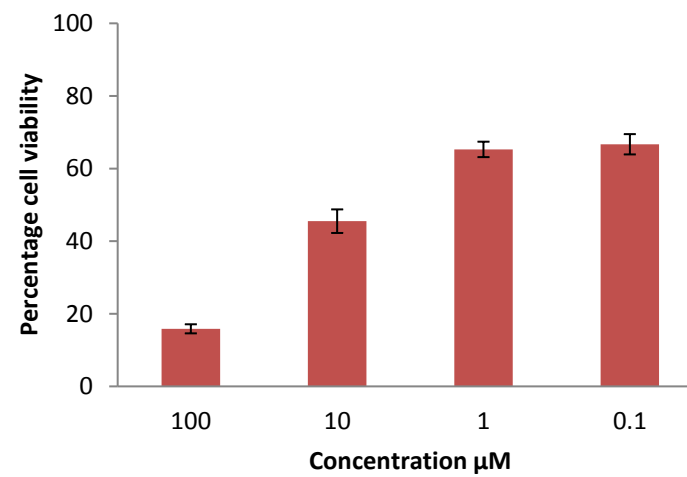

MCF-7

**Figure 64.** Linear regression plots and percentage cell viability graphs of HeLa and MCF-7 cells exposed to different concentrations of **4c**.



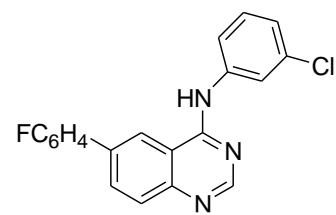

**4d**

**Table 17.** Percentage cell viability of HeLa and MCF-7 cells exposed to different concentrations of **4d**.

| Conc. (μM) | %Viability HeLa | SD   | %Viability MCF-7 | SD   |
|------------|-----------------|------|------------------|------|
| 100        | 9.54            | 0.41 | 17.03            | 1.17 |
| 10         | 54.89           | 0.92 | 63.39            | 2.04 |
| 1          | 59.54           | 0.85 | 64.63            | 1.46 |
| 0.1        | 64.68           | 1.90 | 86.47            | 0.50 |

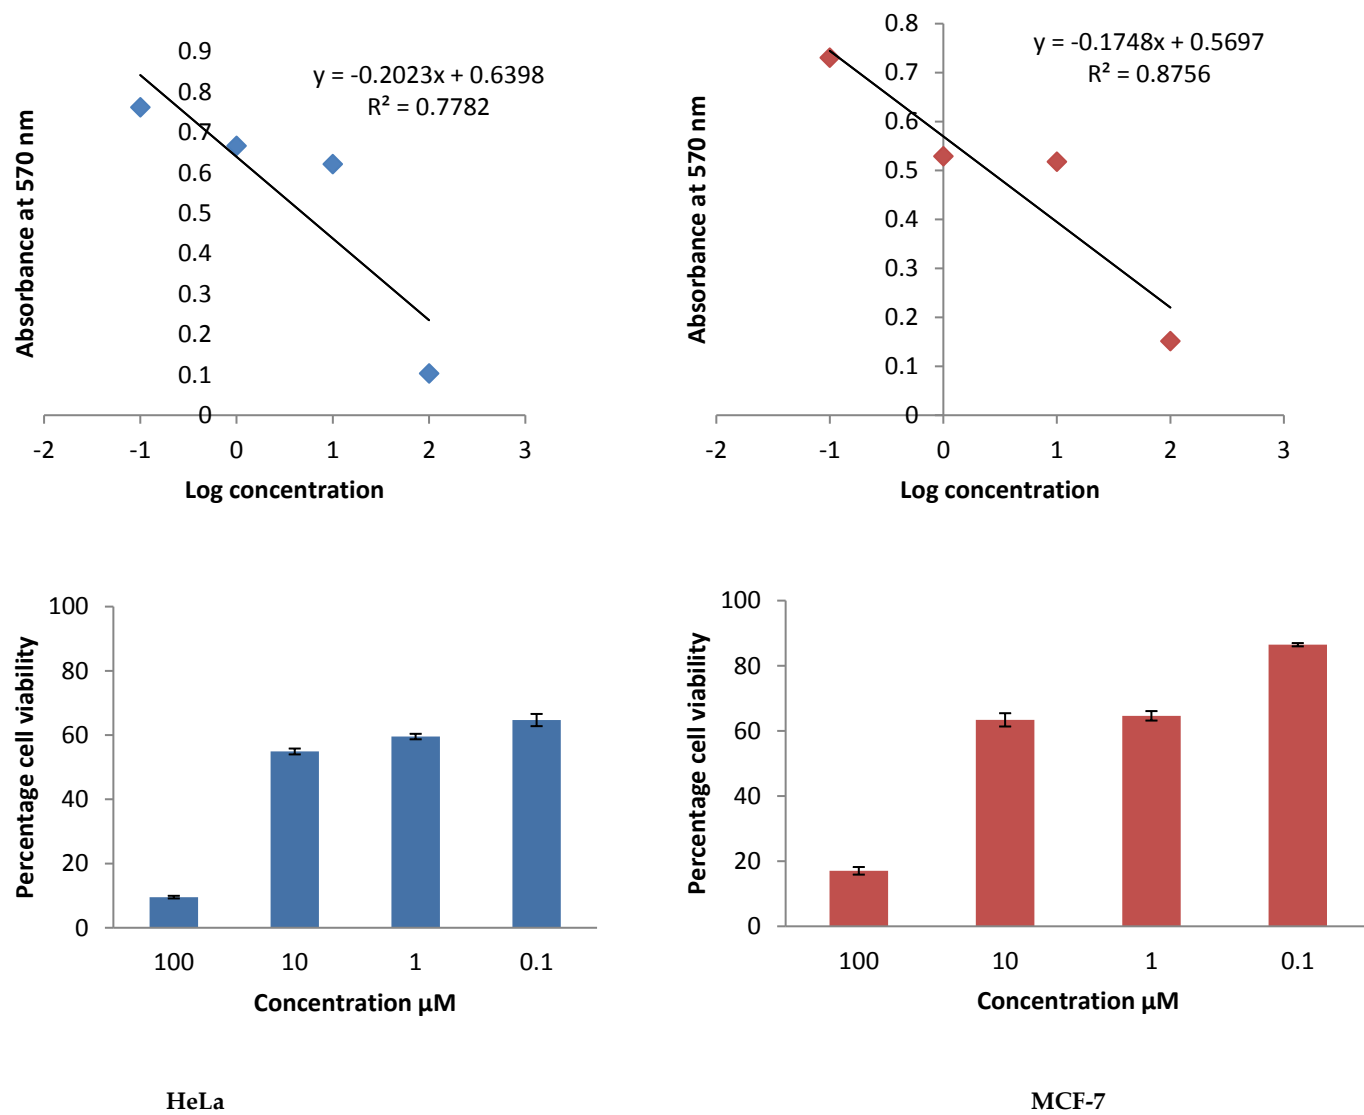

**Figure 65.** Linear regression plots and percentage cell viability graphs of HeLa and MCF-7 cells exposed to different concentrations of **4d**.

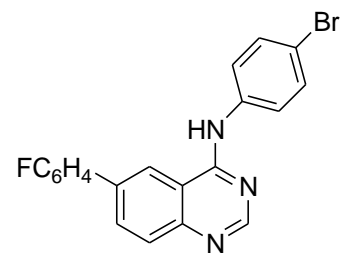

**4e**

**Table 18.** Percentage cell viability of HeLa and MCF-7 cells exposed to different concentrations of **4e**.

| Conc. ( $\mu\text{M}$ ) | %Viability HeLa | SD   | %Viability MCF-7 | SD   |
|-------------------------|-----------------|------|------------------|------|
| 100                     | 9.16            | 0.50 | 14.62            | 0.42 |
| 10                      | 52.26           | 1.26 | 60.83            | 1.09 |
| 1                       | 68.12           | 0.22 | 66.19            | 1.50 |
| 0.1                     | 70.35           | 2.56 | 76.27            | 1.17 |

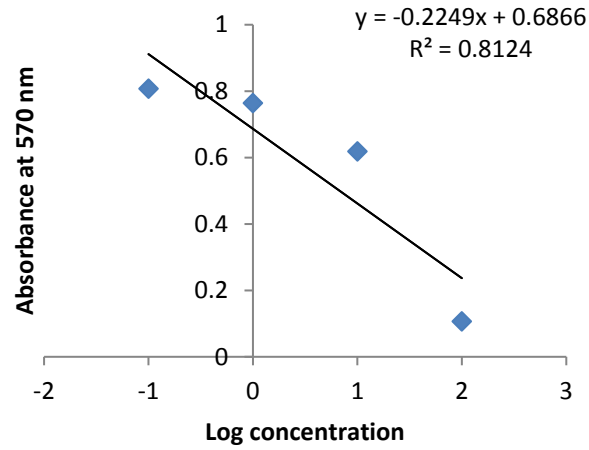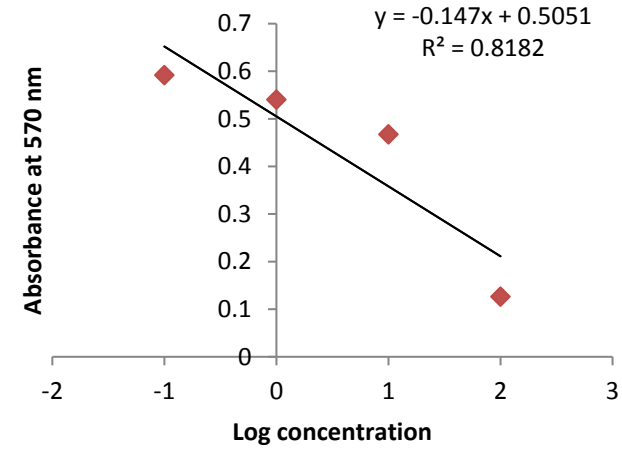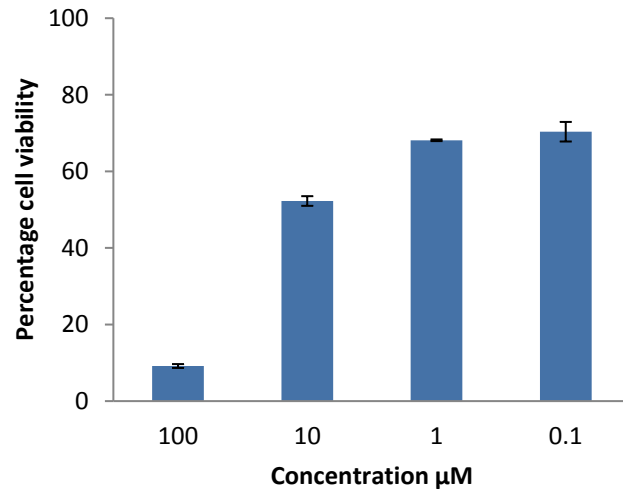

HeLa

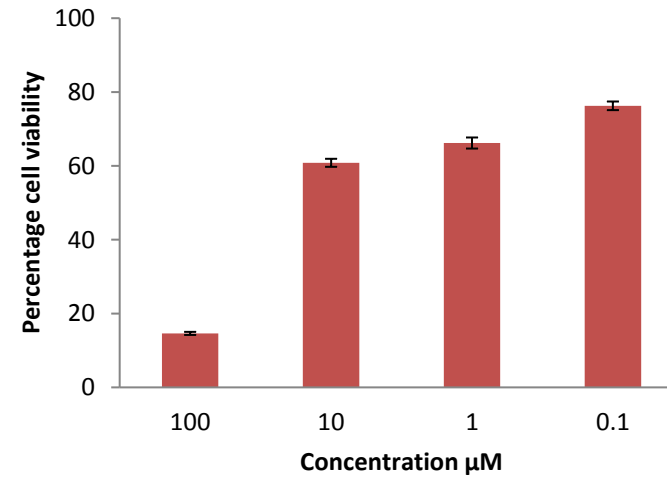

MCF-7

**Figure 66.** Linear regression plots and percentage cell viability graphs of HeLa and MCF-7 cells exposed to different concentrations of **4e**.

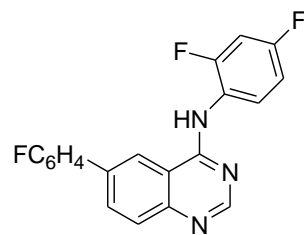

**4f**

**Table 19.** Percentage cell viability of HeLa and MCF-7 cells exposed to different concentrations of **4f**.

| Conc. ( $\mu\text{M}$ ) | %Viability HeLa | SD   | %Viability MCF-7 | SD   |
|-------------------------|-----------------|------|------------------|------|
| 100                     | 9.27            | 0.16 | 14.79            | 0.33 |
| 10                      | 52.75           | 1.40 | 48.92            | 1.17 |
| 1                       | 55.16           | 1.03 | 53.75            | 0.33 |
| 0.1                     | 68.43           | 1.30 | 69.32            | 1.50 |

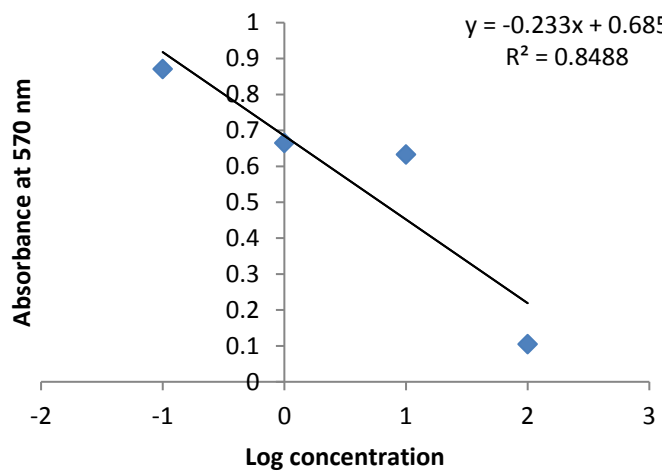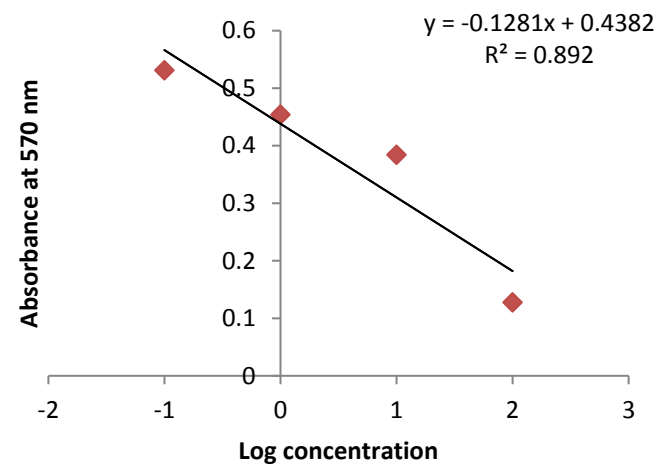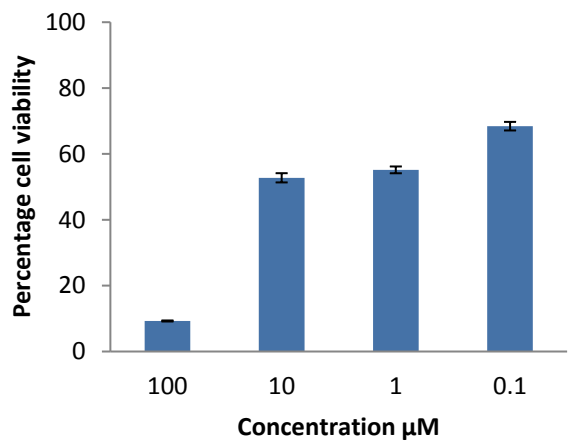

HeLa

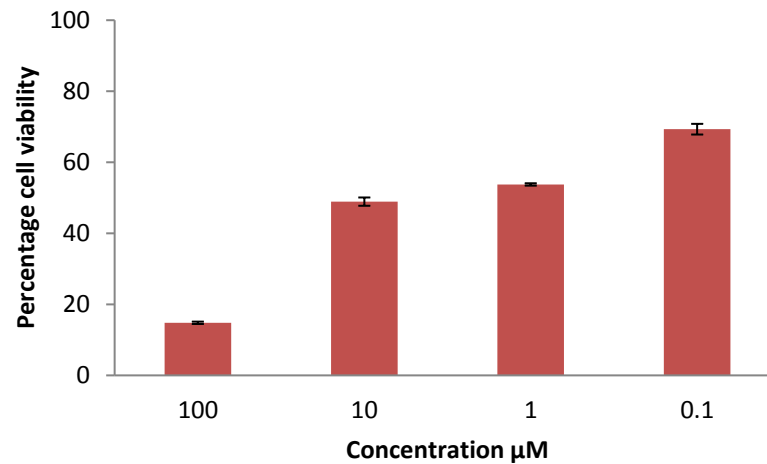

MCF-7

**Figure 67.** Linear regression plots and percentage cell viability graphs of HeLa and MCF-7 cells exposed to different concentrations of **4f**.

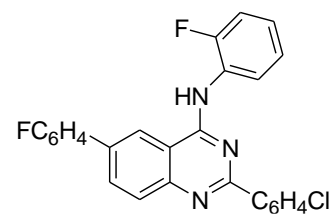

4g

**Table 20.** Percentage cell viability of HeLa and MCF-7 cells exposed to different concentrations of **4g**.

| Conc. ( $\mu\text{M}$ ) | %Viability HeLa | SD   | %Viability MCF-7 | SD   |
|-------------------------|-----------------|------|------------------|------|
| 100                     | 10.14           | 0.13 | 15.97            | 0.08 |
| 10                      | 29.09           | 1.77 | 45.33            | 1.25 |
| 1                       | 49.49           | 1.28 | 52.61            | 1.29 |
| 0.1                     | 64.03           | 1.98 | 62.60            | 1.34 |

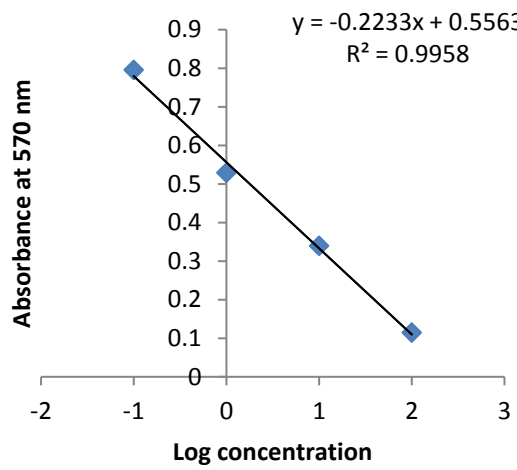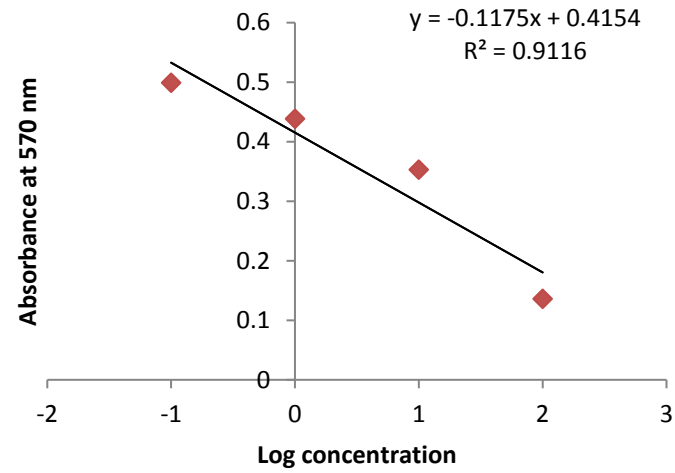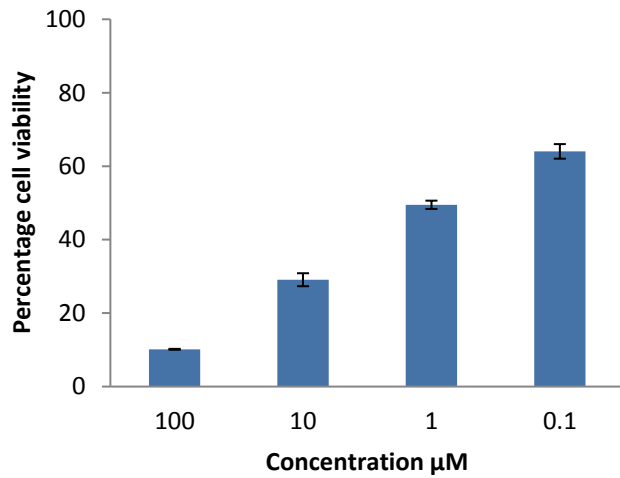

HeLa

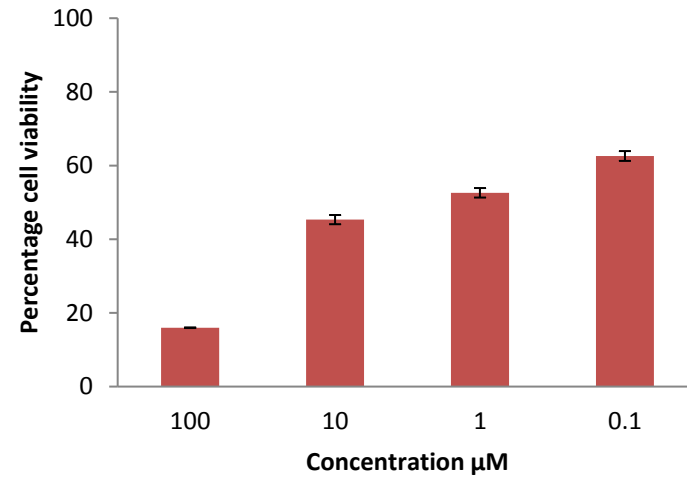

MCF-7

**Figure 68.** Linear regression plots and percentage cell viability graphs of HeLa and MCF-7 cells exposed to different concentrations of **4g**.



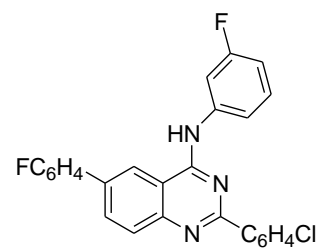

**4h**

**Table 21.** Percentage cell viability of HeLa and MCF-7 cells exposed to different concentrations of **4h**.

| Conc. ( $\mu\text{M}$ ) | %Viability HeLa | SD   | %Viability MCF-7 | SD   |
|-------------------------|-----------------|------|------------------|------|
| 100                     | 10.08           | 0.16 | 12.79            | 0.67 |
| 10                      | 49.87           | 0.88 | 54.05            | 1.75 |
| 1                       | 52.99           | 0.31 | 59.00            | 1.08 |
| 0.1                     | 55.74           | 1.00 | 64.66            | 1.92 |

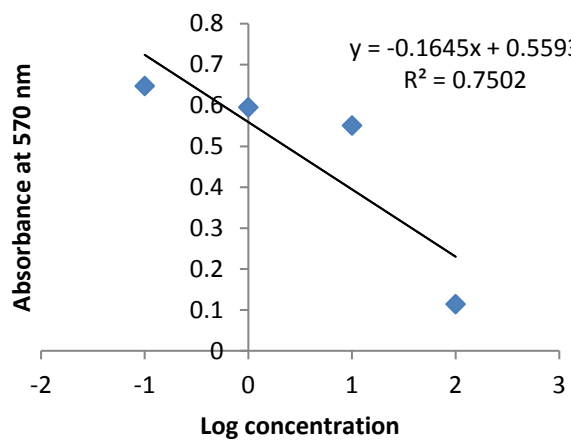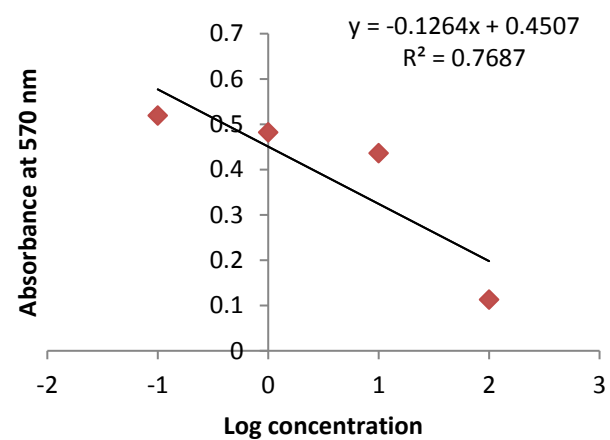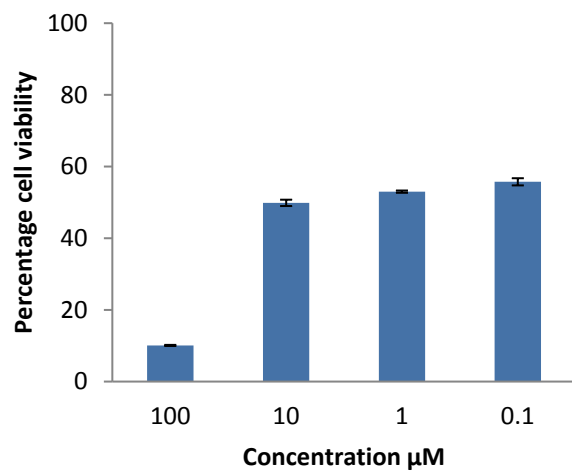

HeLa

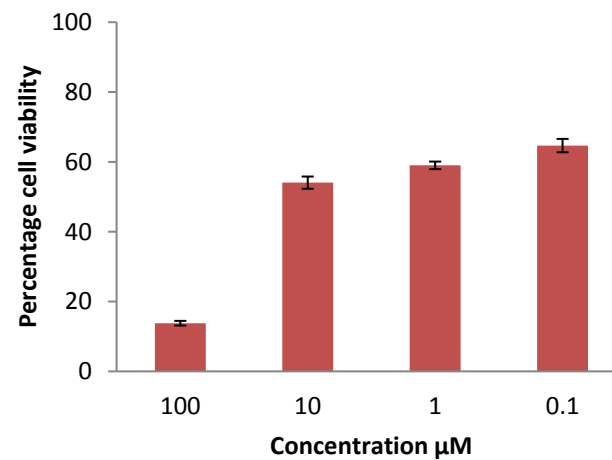

MCF-7

**Figure 69.** Linear regression plots and percentage cell viability graphs of HeLa and MCF-7 cells exposed to different concentrations of **4h**.

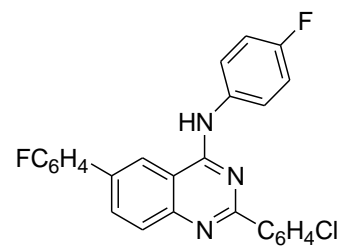

**4i**

**Table 22.** Percentage cell viability of HeLa and MCF-7 cells exposed to different concentrations of **4i**.

| Conc. ( $\mu\text{M}$ ) | %Viability HeLa | SD   | %Viability MCF-7 | SD   |
|-------------------------|-----------------|------|------------------|------|
| 100                     | 8.18            | 0.63 | 10.43            | 0.25 |
| 10                      | 50.98           | 1.58 | 55.40            | 1.00 |
| 1                       | 54.33           | 1.43 | 60.33            | 1.58 |
| 0.1                     | 62.51           | 0.69 | 66.01            | 1.00 |

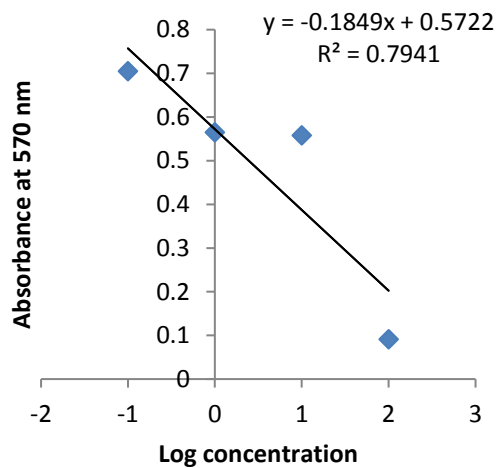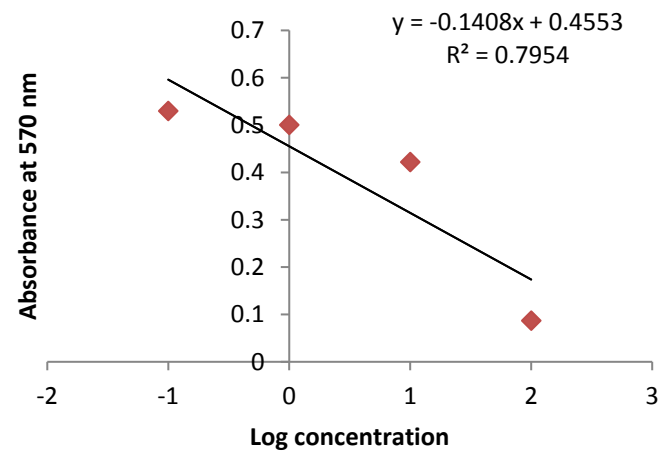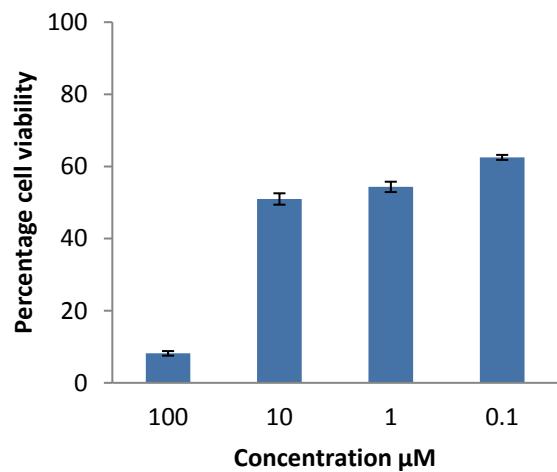

HeLa

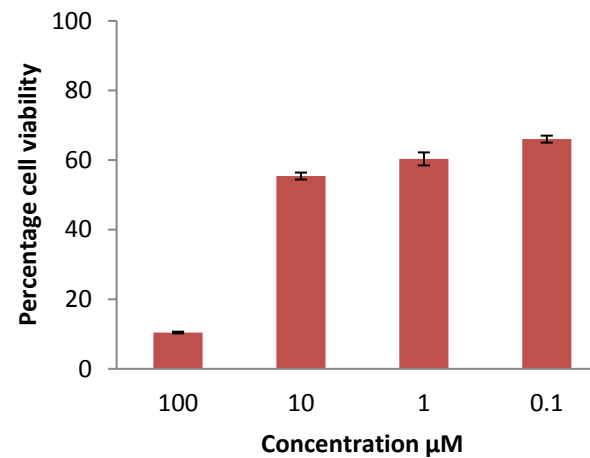

MCF-7

**Figure 70.** Linear regression plots and percentage cell viability graphs of HeLa and MCF-7 cells exposed to different concentrations of **4i**.

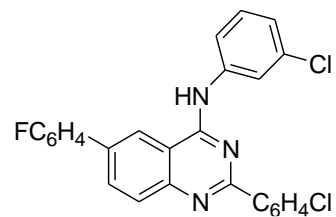

4j

**Table 23.** Percentage cell viability of HeLa and MCF-7 cells exposed to different concentrations of 4j.

| Conc. ( $\mu\text{M}$ ) | %Viability HeLa | SD   | %Viability MCF-7 | SD   |
|-------------------------|-----------------|------|------------------|------|
| 100                     | 7.24            | 1.00 | 10.02            | 1.17 |
| 10                      | 54.71           | 1.75 | 46.27            | 1.92 |
| 1                       | 74.66           | 2.46 | 66.49            | 0.80 |
| 0.1                     | 85.21           | 1.80 | 75.95            | 1.29 |

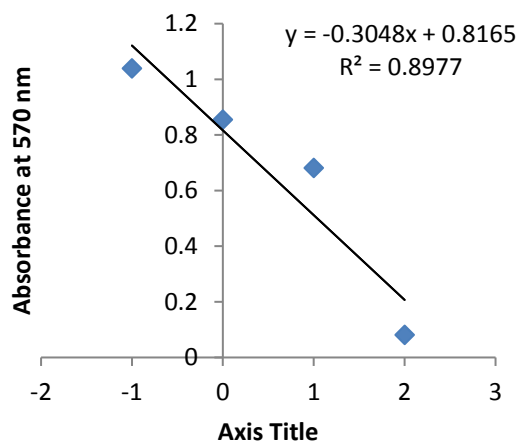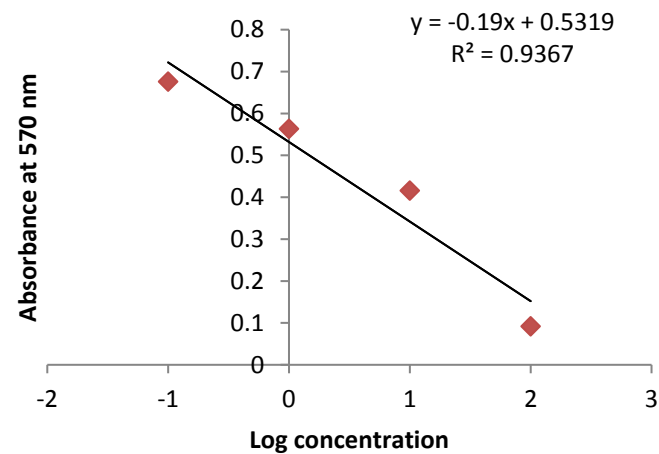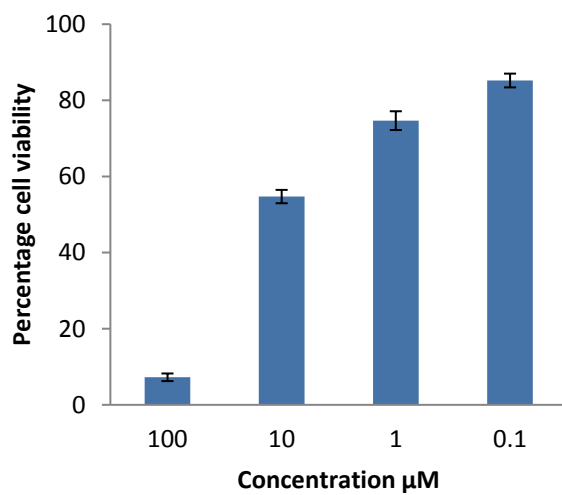

HeLa

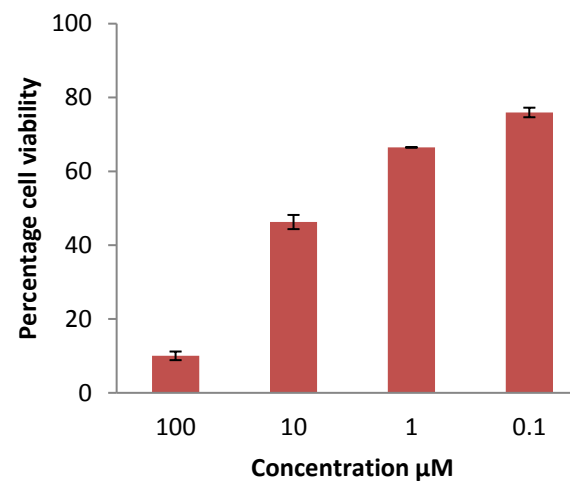

MCF-7

**Figure 71**, Linear regression plots and percentage cell viability graphs of HeLa and MCF-7 cells exposed to different concentrations of 4j.

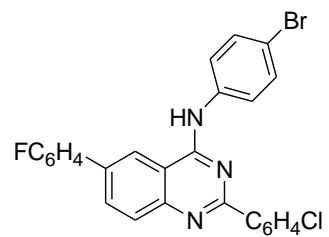

4k

**Table 24.** Percentage cell viability of HeLa and MCF-7 cells exposed to different concentrations of 4k.

| Conc. ( $\mu\text{M}$ ) | %Viability HeLa | SD   | %Viability MCF-7 | SD   |
|-------------------------|-----------------|------|------------------|------|
| 100                     | 11.79           | 0.50 | 12.85            | 0.75 |
| 10                      | 38.20           | 2.15 | 51.93            | 1.58 |
| 1                       | 47.63           | 1.26 | 56.11            | 0.08 |
| 0.1                     | 54.44           | 1.54 | 69.32            | 1.68 |

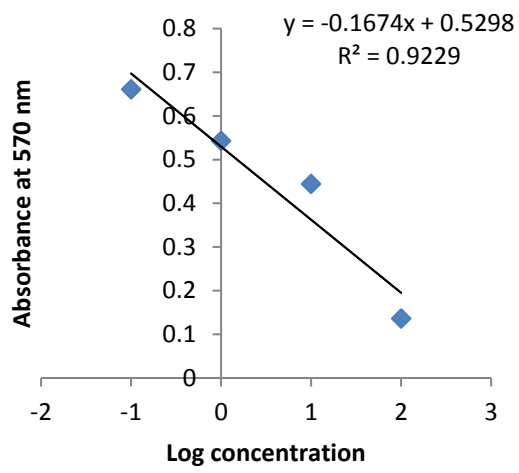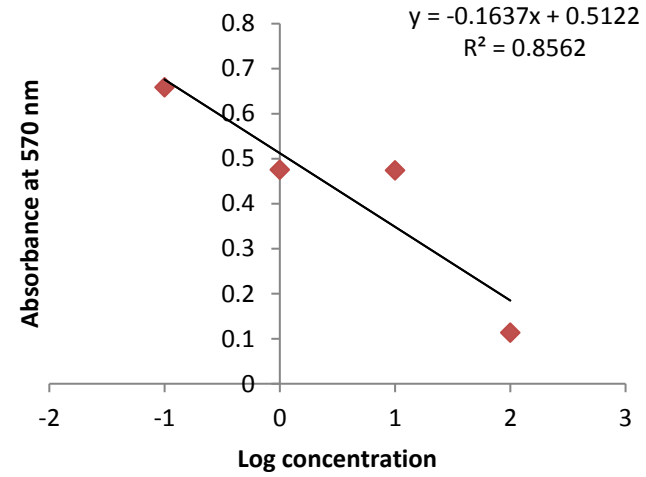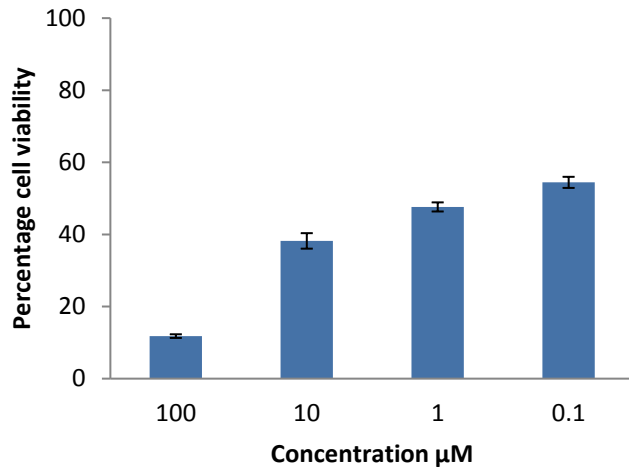

HeLa

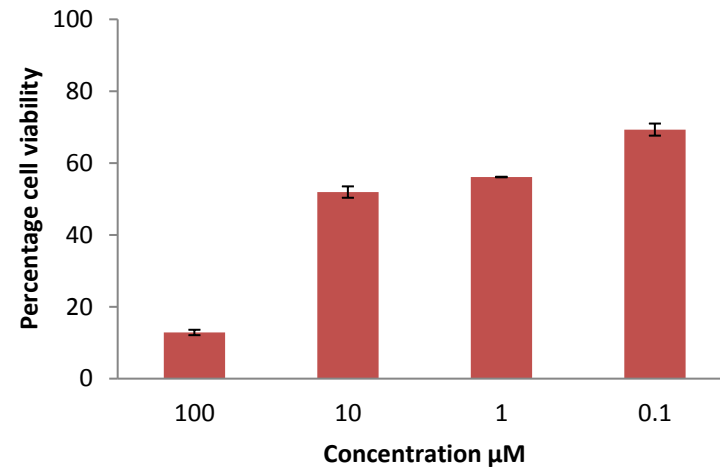

MCF-7

**Figure 72.** Linear regression plots and percentage cell viability graphs of HeLa and MCF-7 cells exposed to different concentrations of **4k**.



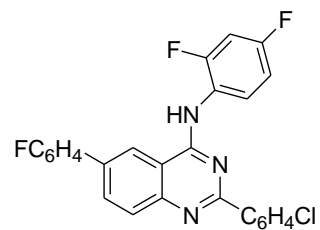

41

**Table 25.** Percentage cell viability of HeLa and MCF-7 cells exposed to different concentrations of 41.

| Conc. ( $\mu\text{M}$ ) | %Viability HeLa | SD   | %Viability MCF-7 | SD   |
|-------------------------|-----------------|------|------------------|------|
| 100                     | 8.71            | 0.13 | 10.52            | 0.54 |
| 10                      | 26.16           | 1.42 | 24.67            | 1.46 |
| 1                       | 47.83           | 0.47 | 50.75            | 0.67 |
| 0.1                     | 59.02           | 1.25 | 60.68            | 1.04 |

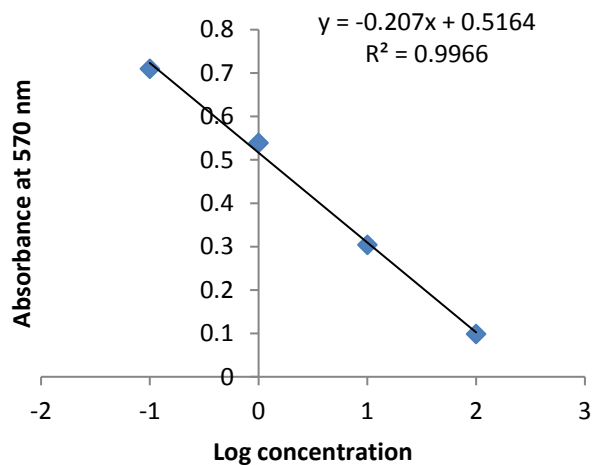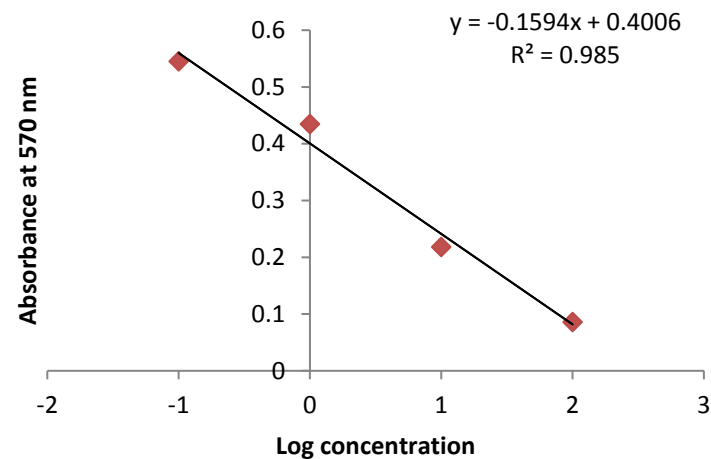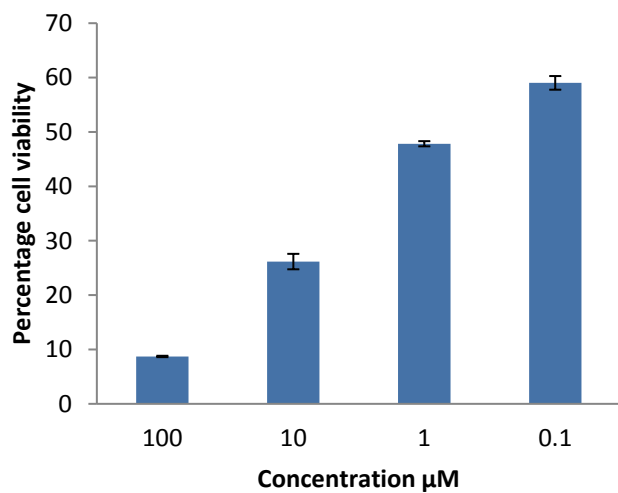

HeLa

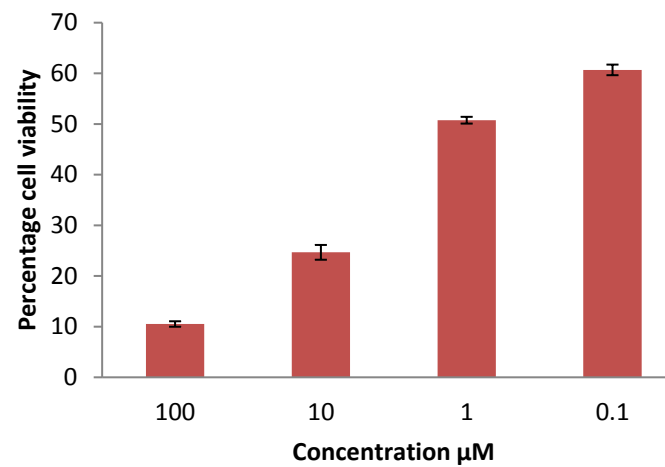

MCF-7

**Figure 73.** Linear regression plots and percentage cell viability graphs of HeLa and MCF-7 cells exposed to different concentrations of **41**.

**S3. Percentage Inhibition Curves of 3g, 3l, 4l, and Gefitinib (S3)**
